# Supplementary material for: Infection Exposure Is a Causal Factor in B-cell Precursor Acute Lymphoblastic Leukemia as a Result of Pax5 -Inherited Susceptibility
Source: Oxford University Press journal article supplement (doi:10.1158/2159-8290.cd-15-0892), 2015-09-25
Supplement: 21598290cd150892-sup-153083_1_supp_3134885_ny982l.xlsx [file 21598290cd150892-sup-153083_1_supp_3134885_ny982l.xlsx]

## Sheet: Hoja1
CONVENTIONAL FACILITY HEALTH MONITORING REPORT					SPF FACILITY HEALTH MONITORING REPORT
Timeline	When mice are moved to the conventional facility	1 year later	2 years later
VIRUSES
MAD (Adenovirus type 1 and 2)	NEG	NEG	NEG		NEG
MCMV (Mouse cytomegalovirus)	NEG	NEG	NEG		NEG
LCMV (Lymph choriomeningitis)	NEG	NEG	NEG		NEG
Ectromelia	NEG	NEG	NEG		NEG
EDIM	NEG	NEG	NEG		NEG
Hantaan virus	NEG	NEG	NEG		NEG
MHV (Mouse hepatitis virus)	POS	POS	POS		NEG
MVM (Minute virus)	NEG	NEG	NEG		NEG
MPV (Parvovirus type 1 and 2)	NEG	NEG	NEG		NEG
PVM (Pneumonia virus)	NEG	NEG	NEG		NEG
Reovirus type 3	NEG	NEG	NEG		NEG
Sendai	NEG	NEG	NEG		NEG
TMEV (Theiler´s murine encephalomyel)	NEG	NEG	NEG		NEG
K virus	NEG	NEG	NEG		NEG
Polyoma virus	NEG	NEG	NEG		NEG
MNV (Norovirus)	POS	POS	POS		NEG
BACTERIA
Bordetella bronchiseptica	NEG	NEG	NEG		NEG
Car-bacillus	NEG	NEG	NEG		NEG
Citrobacter rodentium	NEG	NEG	NEG		NEG
Clostridium piliforme (Tyzzer´ disease)	NEG	NEG	NEG		NEG
Corynebacterium kutscheri	NEG	NEG	NEG		NEG
Mycoplasma pulmonis	NEG	NEG	NEG		NEG
Pasteurella pneumotropica	NEG	NEG	NEG		NEG
Pasteurella multocida	NEG	NEG	NEG		NEG
Salmonella spp	NEG	NEG	NEG		NEG
Streptobacillus moniliformis	NEG	NEG	NEG		NEG
Streptococci beta hemolíticos (A,G)	NEG	NEG	NEG		NEG
Streptococcus pneumoniae	NEG	NEG	NEG		NEG
Helicobacter spp	POS	POS	POS		NEG
PARASITES
Ectoparasites	NEG	NEG	NEG		NEG
Helminth (A.tetraptrera, Syphacia spp)	NEG	NEG	NEG		NEG
Cestods (Hymenolepis spp)	NEG	NEG	NEG		NEG
Eimeria spp	NEG	NEG	NEG		NEG
Entamoeba muris	NEG	NEG	NEG		NEG
Giardia spp	NEG	NEG	NEG		NEG
Trichomonas muris	POS	POS	NEG		NEG
Spironucleus spp	NEG	NEG	NEG		NEG
Encephalitozoon cuniculi	NEG	NEG	NEG		NEG
NECROPSY	No gross lesion.	No gross lesion.	No gross lesion.		No gross lesion.
NEG: Negative
POS: Positive
