# Supplementary material for: Infection Exposure Is a Causal Factor in B-cell Precursor Acute Lymphoblastic Leukemia as a Result of Pax5 -Inherited Susceptibility
Source: Oxford University Press journal article supplement (doi:10.1158/2159-8290.cd-15-0892), 2015-09-25
Supplement: 21598290cd150892-sup-153083_1_supp_3134886_nl982l.xlsx [file 21598290cd150892-sup-153083_1_supp_3134886_nl982l.xlsx]

## Sheet: PAX5_vs_WT_FDR005_8440g
Supplementary Table S2: Differentially expressed genes in bone marrow tumors from Pax5+/- mice compared to wild-type B220+ bone marrow B cells. (8840 genes-probesets with FDR = 0.005)
nº	probeset ID	d.value	p.value	q.value	R.fold	Genename	Description
1	10384020	-54.6601	2.81246e-07	0.00294623	0.0427198	Polm	polymerase (DNA directed), mu
2	10403011	-39.1295	5.62493e-07	0.00294623	0.0370794	NA	NA
3	10528385	-33.5545	8.43739e-07	0.00294623	0.0398664	Reln	reelin
4	10350646	-30.6524	1.12499e-06	0.00294623	0.251952	Edem3	ER degradation enhancer, mannosidase alpha-like 3
5	10607848	-30.3723	1.40623e-06	0.00294623	0.100305	Egfl6	EGF-like-domain, multiple 6
6	10545245	-29.6479	1.68748e-06	0.00294623	0.0680119	NA	NA
7	10583316	29.1294	1.96873e-06	0.00294623	2.1894	Taf1d	TATA box binding protein (Tbp)-associated factor, RNA polymerase I, D
8	10353192	-28.2128	2.24997e-06	0.00294623	0.0596318	Eya1	eyes absent 1 homolog (Drosophila)
9	10437698	-28.0865	2.53122e-06	0.00294623	0.246235	Txndc11	thioredoxin domain containing 11
10	10369252	27.0487	2.81246e-06	0.00294623	4.27116	40422	septin 10
11	10600284	-25.2903	3.09371e-06	0.00294623	0.150612	Srpk3	serine/arginine-rich protein specific kinase 3
12	10403006	-23.975	3.37496e-06	0.00294623	0.172175	NA	NA
13	10468533	-23.9509	3.6562e-06	0.00294623	0.152372	Gpam	glycerol-3-phosphate acyltransferase, mitochondrial
14	10501608	23.2901	3.93745e-06	0.00294623	19.6079	Vcam1	vascular cell adhesion molecule 1
15	10402986	-22.578	4.2187e-06	0.00294623	0.116375	NA	NA
16	10537246	22.4287	4.49994e-06	0.00294623	2.36708	Nup205	nucleoporin 205
17	10428232	-22.292	4.78119e-06	0.00294623	0.199195	Rrm2b	ribonucleotide reductase M2 B (TP53 inducible)
18	10545224	-22.1017	5.06244e-06	0.00294623	0.178574	NA	NA
19	10440929	22.089	5.34368e-06	0.00294623	2.92889	Gart	phosphoribosylglycinamide formyltransferase
20	10494306	-21.9111	5.62493e-06	0.00294623	0.414448	Mcl1	myeloid cell leukemia sequence 1
21	10517421	-21.845	5.90618e-06	0.00294623	0.549035	Pnrc2	proline-rich nuclear receptor coactivator 2
22	10413640	21.6203	6.18742e-06	0.00294623	1.81228	Nek4	NIMA (never in mitosis gene a)-related expressed kinase 4
23	10504056	-21.5583	6.46867e-06	0.00294623	0.562431	Ubap1	ubiquitin-associated protein 1
24	10437272	21.5175	6.74992e-06	0.00294623	5.90149	Nlrc3	NLR family, CARD domain containing 3
25	10381049	-21.1933	7.03116e-06	0.00294623	0.0837882	Rapgefl1	Rap guanine nucleotide exchange factor (GEF)-like 1
26	10475544	21.1754	7.31241e-06	0.00294623	21.8915	Sema6d	sema domain, transmembrane domain (TM), and cytoplasmic domain, (semaphorin) 6D
27	10492671	21.0799	7.59366e-06	0.00294623	1.80757	Ppid	peptidylprolyl isomerase D (cyclophilin D)
28	10558961	20.9378	7.8749e-06	0.00294623	8.52694	Tspan4	tetraspanin 4
29	10396849	20.9316	8.15615e-06	0.00294623	3.45859	Rad51b	RAD51 homolog B
30	10594609	-20.8917	8.43739e-06	0.00294623	0.379509	Fbxl22	F-box and leucine-rich repeat protein 22
31	10509023	-20.8283	8.71864e-06	0.00294623	0.525394	Syf2	SYF2 homolog, RNA splicing factor (S. cerevisiae)
32	10419559	20.6831	8.99989e-06	0.00294623	95.2184	Rnase12	ribonuclease, RNase A family, 12 (non-active)
33	10361007	20.5642	9.28113e-06	0.00294623	11.9374	Smyd2	SET and MYND domain containing 2
34	10494137	-20.3258	9.56238e-06	0.00294623	0.525078	Pi4kb	phosphatidylinositol 4-kinase, catalytic, beta polypeptide
35	10538887	-20.1759	9.84363e-06	0.00294623	0.120637	NA	NA
36	10563338	-20.1155	1.01249e-05	0.00294623	0.211688	Ppp1r15a	protein phosphatase 1, regulatory (inhibitor) subunit 15A
37	10545202	-20.1065	1.04061e-05	0.00294623	0.223743	NA	NA
38	10469358	20.0586	1.06874e-05	0.00294623	6.14508	Mrc1	mannose receptor, C type 1
39	10385665	-19.8374	1.09686e-05	0.00294623	0.330723	Zfp354b	zinc finger protein 354B
40	10349782	-19.5804	1.12499e-05	0.00294623	0.230219	Nuak2	NUAK family, SNF1-like kinase, 2
41	10461439	19.5165	1.15311e-05	0.00294623	3.26846	NA	NA
42	10481845	19.5098	1.18124e-05	0.00294623	10.4135	Mvb12b	multivesicular body subunit 12B
43	10417070	19.4494	1.20936e-05	0.00294623	2.58703	Ipo5	importin 5
44	10596812	19.3918	1.23748e-05	0.00294623	3.26523	Fam212a	family with sequence similarity 212, member A
45	10359849	19.3317	1.26561e-05	0.00294623	5.66902	Uck2	uridine-cytidine kinase 2
46	10381154	-19.3107	1.29373e-05	0.00294623	0.255177	Cnp	2',3'-cyclic nucleotide 3' phosphodiesterase
47	10457787	-19.2467	1.32186e-05	0.00294623	0.054264	Klhl14	kelch-like 14
48	10379740	-19.1529	1.34998e-05	0.00294623	0.391637	Heatr6	HEAT repeat containing 6
49	10346840	19.1468	1.37811e-05	0.00294623	1.40029	NA	NA
50	10359386	19.1323	1.40623e-05	0.00294623	2.09768	Dars2	aspartyl-tRNA synthetase 2 (mitochondrial)
51	10529979	-18.8722	1.43436e-05	0.00294623	0.28861	Ppargc1a	peroxisome proliferative activated receptor, gamma, coactivator 1 alpha
52	10568217	18.771	1.46248e-05	0.00294623	2.35625	Dctpp1	dCTP pyrophosphatase 1
53	10355806	18.6914	1.49061e-05	0.00294623	2.48428	Tuba4a	tubulin, alpha 4A
54	10354286	18.6512	1.51873e-05	0.00294623	3.45117	Kdelc1	KDEL (Lys-Asp-Glu-Leu) containing 1
55	10538408	-18.3794	1.54686e-05	0.00294623	0.228693	Mturn	maturin, neural progenitor differentiation regulator homolog (Xenopus)
56	10512640	-18.3685	1.57498e-05	0.00294623	0.42706	Gne	glucosamine (UDP-N-acetyl)-2-epimerase/N-acetylmannosamine kinase
57	10387222	18.3572	1.6031e-05	0.00294623	2.71667	Pfas	phosphoribosylformylglycinamidine synthase (FGAR amidotransferase)
58	10365971	-18.3339	1.63123e-05	0.00294623	0.215038	Btg1	B cell translocation gene 1, anti-proliferative
59	10361292	-18.3234	1.65935e-05	0.00294623	0.0560171	Cr2	complement receptor 2
60	10520553	-18.3207	1.68748e-05	0.00294623	0.576261	Tmem214	transmembrane protein 214
61	10377927	-18.2026	1.7156e-05	0.00294623	0.390953	Rnf167	ring finger protein 167
62	10393866	-18.1908	1.74373e-05	0.00294623	0.469385	Sirt7	sirtuin 7
63	10501282	-18.1805	1.77185e-05	0.00294623	0.466134	Cyb561d1	cytochrome b-561 domain containing 1
64	10344561	-18.0757	1.79998e-05	0.00294623	0.506981	NA	NA
65	10572800	-17.7465	1.8281e-05	0.00294623	0.141829	Klf2	Kruppel-like factor 2 (lung)
66	10568997	17.7209	1.85623e-05	0.00294623	2.80189	NA	NA
67	10555087	17.7121	1.88435e-05	0.00294623	2.18192	NA	NA
68	10456046	17.6882	1.91248e-05	0.00294623	4.2891	Pdgfrb	platelet derived growth factor receptor, beta polypeptide
69	10386058	17.6323	1.9406e-05	0.00294623	25.4373	Sparc	secreted acidic cysteine rich glycoprotein
70	10469571	-17.5906	1.96873e-05	0.00294623	0.192801	Otud1	OTU domain containing 1
71	10353844	-17.5328	1.99685e-05	0.00294623	0.143228	Neurl3	neuralized homolog 3 homolog (Drosophila)
72	10365344	-17.5138	2.02497e-05	0.00294623	0.221506	Tcp11l2	t-complex 11 (mouse) like 2
73	10582275	17.4859	2.0531e-05	0.00294623	4.34835	Slc7a5	solute carrier family 7 (cationic amino acid transporter, y+ system), member 5
74	10560983	-17.2138	2.08122e-05	0.00294623	0.531689	Dedd2	death effector domain-containing DNA binding protein 2
75	10399430	17.2127	2.10935e-05	0.00294623	2.05408	Ddx1	DEAD (Asp-Glu-Ala-Asp) box polypeptide 1
76	10356859	17.1325	2.13747e-05	0.00294623	1.92648	Dtymk	deoxythymidylate kinase
77	10392135	-16.9619	2.1656e-05	0.00294623	0.186695	Gh	growth hormone
78	10481383	16.9293	2.19372e-05	0.00294623	2.95132	Wdr34	WD repeat domain 34
79	10523802	16.9275	2.22185e-05	0.00294623	3.2259	Cdc7	cell division cycle 7 (S. cerevisiae)
80	10357875	-16.9082	2.24997e-05	0.00294623	0.196209	Btg2	B cell translocation gene 2, anti-proliferative
81	10573451	16.8988	2.2781e-05	0.00294623	3.94056	Syce2	synaptonemal complex central element protein 2
82	10570556	16.7293	2.30622e-05	0.00294623	2.608	Mcph1	microcephaly, primary autosomal recessive 1
83	10443199	-16.6561	2.33435e-05	0.00294623	0.455989	C130040N14Rik	RIKEN cDNA C130040N14 gene
84	10450365	16.5407	2.36247e-05	0.00294623	5.38329	NA	NA
85	10339779	-16.5401	2.3906e-05	0.00294623	0.563407	NA	NA
86	10522668	16.5329	2.41872e-05	0.00294623	1.88699	Paics	phosphoribosylaminoimidazole carboxylase, phosphoribosylaminoribosylaminoimidazole, succinocarboxamide synthetase
87	10347193	16.5304	2.44684e-05	0.00294623	2.78558	Atic	5-aminoimidazole-4-carboxamide ribonucleotide formyltransferase/IMP cyclohydrolase
88	10576056	-16.4772	2.47497e-05	0.00294623	0.476461	Map1lc3b	microtubule-associated protein 1 light chain 3 beta
89	10592067	-16.4395	2.50309e-05	0.00294623	0.509159	Fli1	Friend leukemia integration 1
90	10407159	-16.3996	2.53122e-05	0.00294623	0.187354	Ankrd55	ankyrin repeat domain 55
91	10463836	16.3801	2.55934e-05	0.00294623	5.02366	NA	NA
92	10538871	-16.3772	2.58747e-05	0.00294623	0.121249	NA	NA
93	10412298	16.3512	2.61559e-05	0.00294623	4.33817	Itga1	integrin alpha 1
94	10545897	-16.341	2.64372e-05	0.00294623	0.58164	Dusp11	dual specificity phosphatase 11 (RNA/RNP complex 1-interacting)
95	10459844	16.3084	2.67184e-05	0.00294623	3.18272	Haus1	HAUS augmin-like complex, subunit 1
96	10520734	-16.303	2.69997e-05	0.00294623	0.608002	Nrbp1	nuclear receptor binding protein 1
97	10449315	16.2971	2.72809e-05	0.00294623	2.17207	Uqcc2	ubiquinol-cytochrome c reductase complex assembly factor 2
98	10447589	16.186	2.75622e-05	0.00294623	2.02978	NA	NA
99	10530841	16.1271	2.78434e-05	0.00294623	20.5225	Igfbp7	insulin-like growth factor binding protein 7
100	10523297	-16.1009	2.81246e-05	0.00294623	0.381117	Ccng2	cyclin G2
101	10533945	-16.098	2.84059e-05	0.00294623	0.706272	Ubc	ubiquitin C
102	10354897	-16.0978	2.86871e-05	0.00294623	0.428205	Trak2	trafficking protein, kinesin binding 2
103	10458226	16.0962	2.89684e-05	0.00294623	2.74696	Hspa9	heat shock protein 9
104	10357371	-16.0673	2.92496e-05	0.00294623	0.119598	Tmem163	transmembrane protein 163
105	10542310	-16.0532	2.95309e-05	0.00294623	0.365472	Cdkn1b	cyclin-dependent kinase inhibitor 1B
106	10601755	16.0472	2.98121e-05	0.00294623	1.57679	NA	NA
107	10494170	-16.039	3.00934e-05	0.00294623	0.630233	Lysmd1	LysM, putative peptidoglycan-binding, domain containing 1
108	10342910	15.9989	3.03746e-05	0.00294623	7.73303	NA	NA
109	10390103	-15.9192	3.06559e-05	0.00294623	0.176686	Pdk2	pyruvate dehydrogenase kinase, isoenzyme 2
110	10487208	15.8516	3.09371e-05	0.00294623	11.8779	Atp8b4	ATPase, class I, type 8B, member 4
111	10355567	15.8513	3.12184e-05	0.00294623	4.62463	Tmbim1	transmembrane BAX inhibitor motif containing 1
112	10533659	15.7679	3.14996e-05	0.00294623	2.19901	Clip1	CAP-GLY domain containing linker protein 1
113	10565018	-15.7582	3.17809e-05	0.00294623	0.490422	Iqgap1	IQ motif containing GTPase activating protein 1
114	10386604	15.7309	3.20621e-05	0.00294623	3.90967	Shmt1	serine hydroxymethyltransferase 1 (soluble)
115	10583314	15.7023	3.23433e-05	0.00294623	1.87453	Taf1d	TATA box binding protein (Tbp)-associated factor, RNA polymerase I, D
116	10521709	15.6343	3.26246e-05	0.00294623	4.42443	Lap3	leucine aminopeptidase 3
117	10513666	-15.5934	3.29058e-05	0.00294623	0.531914	Akna	AT-hook transcription factor
118	10591281	-15.5534	3.31871e-05	0.00294623	0.528063	Col5a3	collagen, type V, alpha 3
119	10367179	15.5069	3.34683e-05	0.00294623	2.42297	Timeless	timeless circadian clock 1
120	10439762	15.5032	3.37496e-05	0.00294623	2.9635	NA	NA
121	10579313	15.4759	3.40308e-05	0.00294623	2.27688	Ssbp4	single stranded DNA binding protein 4
122	10370242	-15.4295	3.43121e-05	0.00294623	0.520325	Pcbp3	poly(rC) binding protein 3
123	10375499	15.416	3.45933e-05	0.00294623	2.27852	NA	NA
124	10469404	15.4136	3.48746e-05	0.00294623	8.93749	Cacnb2	calcium channel, voltage-dependent, beta 2 subunit
125	10416251	-15.3935	3.51558e-05	0.00294623	0.292925	Egr3	early growth response 3
126	10570573	15.3915	3.54371e-05	0.00294623	2.66885	Agpat5	1-acylglycerol-3-phosphate O-acyltransferase 5 (lysophosphatidic acid acyltransferase, epsilon)
127	10433996	-15.3761	3.57183e-05	0.00294623	0.343387	Snap29	synaptosomal-associated protein 29
128	10579335	-15.3666	3.59996e-05	0.00294623	0.443004	Pgpep1	pyroglutamyl-peptidase I
129	10594426	15.305	3.62808e-05	0.00294623	5.19648	Zwilch	zwilch kinetochore protein
130	10517689	-15.2613	3.6562e-05	0.00294623	0.399678	Pqlc2	PQ loop repeat containing 2
131	10361065	15.2152	3.68433e-05	0.00294623	2.62501	Mfsd7b	major facilitator superfamily domain containing 7B
132	10488816	15.2026	3.71245e-05	0.00294623	2.84952	Ahcy	S-adenosylhomocysteine hydrolase
133	10551891	-15.1828	3.74058e-05	0.00294623	0.133032	Nfkbid	nuclear factor of kappa light polypeptide gene enhancer in B cells inhibitor, delta
134	10507872	15.1758	3.7687e-05	0.00294623	3.27704	NA	NA
135	10383365	-15.1748	3.79683e-05	0.00294623	0.562037	Hgs	HGF-regulated tyrosine kinase substrate
136	10344713	15.1294	3.82495e-05	0.00294623	2.84259	NA	NA
137	10418480	15.0938	3.85308e-05	0.00294623	3.30456	Gnl3	guanine nucleotide binding protein-like 3 (nucleolar)
138	10460146	-14.9702	3.8812e-05	0.00294623	0.155706	NA	NA
139	10546010	-14.9453	3.90933e-05	0.00294623	0.404051	Arhgap25	Rho GTPase activating protein 25
140	10594879	-14.9102	3.93745e-05	0.00294623	0.560768	Tcf12	transcription factor 12
141	10475264	-14.9047	3.96558e-05	0.00294623	0.525001	Ccndbp1	cyclin D-type binding-protein 1
142	10377286	14.8709	3.9937e-05	0.00294623	6.6865	Pik3r6	phosphoinositide-3-kinase, regulatory subunit 6
143	10350504	14.8633	4.02182e-05	0.00294623	1.7195	NA	NA
144	10363575	14.8483	4.04995e-05	0.00294623	4.35715	Dna2	DNA replication helicase 2 homolog (yeast)
145	10575213	14.8377	4.07807e-05	0.00294623	3.62245	Zfhx3	zinc finger homeobox 3
146	10447461	14.7994	4.1062e-05	0.00294623	5.21406	Ston1	stonin 1
147	10362581	14.7843	4.13432e-05	0.00294623	1.88911	Tube1	epsilon-tubulin 1
148	10583318	14.7723	4.24682e-05	0.00294623	5.28578	Taf1d	TATA box binding protein (Tbp)-associated factor, RNA polymerase I, D
149	10409988	14.7723	4.24682e-05	0.00294623	5.28578	NA	NA
150	10405739	14.7723	4.24682e-05	0.00294623	5.28578	NA	NA
151	10391985	14.7723	4.24682e-05	0.00294623	5.28578	NA	NA
152	10562812	-14.6595	4.27495e-05	0.00294623	0.263364	Spib	Spi-B transcription factor (Spi-1/PU.1 related)
153	10413086	14.6468	4.30307e-05	0.00294623	3.56553	Adk	adenosine kinase
154	10508797	-14.6021	4.3312e-05	0.00294623	0.483361	Ahdc1	AT hook, DNA binding motif, containing 1
155	10493726	-14.559	4.35932e-05	0.00294623	0.406313	Dennd4b	DENN/MADD domain containing 4B
156	10520650	14.545	4.38745e-05	0.00294623	2.70682	Cad	carbamoyl-phosphate synthetase 2, aspartate transcarbamylase, and dihydroorotase
157	10545394	-14.5209	4.41557e-05	0.00294623	0.638151	Rnf181	ring finger protein 181
158	10405158	14.503	4.44369e-05	0.00294623	2.43239	NA	NA
159	10482802	-14.4832	4.47182e-05	0.00294623	0.309559	Cytip	cytohesin 1 interacting protein
160	10496735	14.4791	4.49994e-05	0.00294623	1.53899	NA	NA
161	10528507	14.4703	4.52807e-05	0.00294623	3.53236	Pus7	pseudouridylate synthase 7 homolog (S. cerevisiae)
162	10350046	-14.4576	4.55619e-05	0.00294623	0.104443	Kdm5b	lysine (K)-specific demethylase 5B
163	10433929	14.4208	4.58432e-05	0.00294623	2.57523	Ppm1f	protein phosphatase 1F (PP2C domain containing)
164	10522303	14.4179	4.61244e-05	0.00294623	1.76337	Guf1	GUF1 GTPase homolog (S. cerevisiae)
165	10384725	-14.4171	4.64057e-05	0.00294623	0.396882	Rel	reticuloendotheliosis oncogene
166	10588707	14.4005	4.66869e-05	0.00294623	2.7765	Ifrd2	interferon-related developmental regulator 2
167	10507870	14.3904	4.69682e-05	0.00294623	3.19156	NA	NA
168	10435581	14.3739	4.72494e-05	0.00294623	2.69863	Polq	polymerase (DNA directed), theta
169	10525591	14.3625	4.75307e-05	0.00294623	3.67308	Kntc1	kinetochore associated 1
170	10524105	-14.2916	4.78119e-05	0.00294623	0.580826	Chfr	checkpoint with forkhead and ring finger domains
171	10414537	14.2908	4.80931e-05	0.00294623	6.59266	NA	NA
172	10443836	14.2864	4.83744e-05	0.00294623	3.94056	Rrp1b	ribosomal RNA processing 1 homolog B (S. cerevisiae)
173	10581495	14.2693	4.86556e-05	0.00294623	1.61299	NA	NA
174	10486552	-14.249	4.89369e-05	0.00294623	0.481412	Lrrc57	leucine rich repeat containing 57
175	10461176	-14.231	4.92181e-05	0.00294623	0.540598	Stx5a	syntaxin 5A
176	10562480	14.2113	4.94994e-05	0.00294623	2.48672	Nudt19	nudix (nucleoside diphosphate linked moiety X)-type motif 19
177	10363178	14.1914	4.97806e-05	0.00294623	1.66288	Npm1	nucleophosmin 1
178	10588294	14.1609	5.00619e-05	0.00294623	1.68792	Topbp1	topoisomerase (DNA) II binding protein 1
179	10339860	14.1556	5.03431e-05	0.00294623	4.63542	NA	NA
180	10500677	-14.1532	5.06244e-05	0.00294623	0.0504872	Cd2	CD2 antigen
181	10409014	14.143	5.09056e-05	0.00294623	3.46645	NA	NA
182	10360957	-14.1289	5.11869e-05	0.00294623	0.223113	Kctd3	potassium channel tetramerisation domain containing 3
183	10357833	14.1004	5.14681e-05	0.00294623	6.85566	Atp2b4	ATPase, Ca++ transporting, plasma membrane 4
184	10435024	14.0957	5.17494e-05	0.00294623	1.712	Rnf168	ring finger protein 168
185	10594802	-14.0848	5.20306e-05	0.00294623	0.192721	Fam63b	family with sequence similarity 63, member B
186	10571752	14.0504	5.23118e-05	0.00294623	9.38919	Dctd	dCMP deaminase
187	10480999	-14.0386	5.25931e-05	0.00294623	0.650184	Sdccag3	serologically defined colon cancer antigen 3
188	10594840	-14.038	5.28743e-05	0.00294623	0.186506	Myzap	myocardial zonula adherens protein
189	10600169	14.0164	5.31556e-05	0.00294623	20.7202	Bgn	biglycan
190	10588642	-14.0139	5.34368e-05	0.00294623	0.433313	Nprl2	nitrogen permease regulator-like 2
191	10387545	14.0139	5.37181e-05	0.00294623	1.45806	NA	NA
192	10478487	-13.9987	5.39993e-05	0.00294623	0.519059	Sys1	SYS1 Golgi-localized integral membrane protein homolog (S. cerevisiae)
193	10583573	-13.9824	5.42806e-05	0.00294623	0.505023	Atg4d	autophagy related 4D, cysteine peptidase
194	10344110	13.981	5.45618e-05	0.00294623	5.35318	NA	NA
195	10350977	-13.9515	5.48431e-05	0.00294623	0.273565	4930523C07Rik	RIKEN cDNA 4930523C07 gene
196	10559504	-13.9194	5.51243e-05	0.00294623	0.396518	Leng9	leukocyte receptor cluster (LRC) member 9
197	10340109	13.9191	5.54056e-05	0.00294623	4.53813	NA	NA
198	10454229	-13.9119	5.56868e-05	0.00294623	0.25735	4930426D05Rik	RIKEN cDNA 4930426D05 gene
199	10341091	13.8749	5.59681e-05	0.00294623	3.90047	NA	NA
200	10375713	13.8479	5.62493e-05	0.00294623	2.80856	Mgat4b	mannoside acetylglucosaminyltransferase 4, isoenzyme B
201	10414527	13.8458	5.65305e-05	0.00294623	5.9797	NA	NA
202	10445558	13.8388	5.68118e-05	0.00294623	5.19323	Dnph1	2'-deoxynucleoside 5'-phosphate N-hydrolase 1
203	10453918	-13.8122	5.7093e-05	0.00294623	0.478617	3110002H16Rik	RIKEN cDNA 3110002H16 gene
204	10421972	13.7847	5.73743e-05	0.00294623	1.62877	NA	NA
205	10589041	13.7789	5.76555e-05	0.00294623	2.4638	NA	NA
206	10502537	-13.7444	5.79368e-05	0.00294623	0.594987	Sh3glb1	SH3-domain GRB2-like B1 (endophilin)
207	10420957	-13.7406	5.8218e-05	0.00294623	0.432262	Ptk2b	PTK2 protein tyrosine kinase 2 beta
208	10574276	13.7373	5.84993e-05	0.00294623	21.7917	Gpr97	G protein-coupled receptor 97
209	10341652	-13.7049	5.87805e-05	0.00294623	0.533492	NA	NA
210	10454651	13.6719	5.90618e-05	0.00294623	3.08225	NA	NA
211	10508454	-13.649	5.9343e-05	0.00294623	0.428656	Bsdc1	BSD domain containing 1
212	10497265	13.6168	5.96243e-05	0.00294623	11.2421	Fabp4	fatty acid binding protein 4, adipocyte
213	10562784	-13.5691	5.99055e-05	0.00294623	0.306058	Mybpc2	myosin binding protein C, fast-type
214	10443589	-13.5591	6.01867e-05	0.00294623	0.61721	Zfand3	zinc finger, AN1-type domain 3
215	10461158	13.5534	6.0468e-05	0.00294623	5.92578	Snhg1	small nucleolar RNA host gene 1
216	10455974	-13.5473	6.07492e-05	0.00294623	0.770837	Dctn4	dynactin 4
217	10602164	13.5116	6.10305e-05	0.00294623	1.6432	Rbbp7	retinoblastoma binding protein 7
218	10389245	13.4912	6.13117e-05	0.00294623	2.56637	Tada2a	transcriptional adaptor 2A
219	10394560	13.4902	6.1593e-05	0.00294623	1.45567	Smc6	structural maintenance of chromosomes 6
220	10341385	-13.4755	6.18742e-05	0.00294623	0.505377	NA	NA
221	10352048	13.4624	6.21555e-05	0.00294623	3.5048	Exo1	exonuclease 1
222	10363735	-13.4593	6.24367e-05	0.00294623	0.554989	Egr2	early growth response 2
223	10508486	-13.4551	6.2718e-05	0.00294623	0.567838	LOC100505143	uncharacterized LOC100505143
224	10445308	-13.4387	6.29992e-05	0.00294623	0.211635	Cyp39a1	cytochrome P450, family 39, subfamily a, polypeptide 1
225	10376461	-13.4062	6.32805e-05	0.00294623	0.385489	Trim11	tripartite motif-containing 11
226	10404941	-13.3822	6.35617e-05	0.00294623	0.238164	Kdm1b	lysine (K)-specific demethylase 1B
227	10476362	13.3601	6.3843e-05	0.00294623	2.74338	Mcm8	minichromosome maintenance deficient 8 (S. cerevisiae)
228	10379998	13.3352	6.41242e-05	0.00294623	3.14337	Trim37	tripartite motif-containing 37
229	10545252	-13.3313	6.44054e-05	0.00294623	0.558941	NA	NA
230	10446441	13.3196	6.46867e-05	0.00294623	2.27057	Ddx11	DEAD/H (Asp-Glu-Ala-Asp/His) box helicase 11
231	10575291	-13.3129	6.49679e-05	0.00294623	0.339734	Zfp821	zinc finger protein 821
232	10489078	13.3083	6.52492e-05	0.00294623	2.16404	Dsn1	DSN1, MIND kinetochore complex component, homolog (S. cerevisiae)
233	10591263	-13.3044	6.55304e-05	0.00294623	0.290152	Fbxl12	F-box and leucine-rich repeat protein 12
234	10593856	13.3028	6.58117e-05	0.00294623	1.83872	Peak1	pseudopodium-enriched atypical kinase 1
235	10438570	-13.2935	6.60929e-05	0.00294623	0.374314	Magef1	melanoma antigen family F, 1
236	10500876	-13.2863	6.63742e-05	0.00294623	0.420729	Lrig2	leucine-rich repeats and immunoglobulin-like domains 2
237	10551570	-13.2835	6.66554e-05	0.00294623	0.600002	Sirt2	sirtuin 2
238	10523772	-13.192	6.69367e-05	0.00294623	0.429381	Lrrc8d	leucine rich repeat containing 8D
239	10374333	-13.1867	6.72179e-05	0.00294623	0.620235	Ikzf1	IKAROS family zinc finger 1
240	10519497	-13.1763	6.74992e-05	0.00294623	0.173983	Steap4	STEAP family member 4
241	10524266	13.1759	6.77804e-05	0.00294623	1.69749	Chek2	checkpoint kinase 2
242	10564978	13.1744	6.80616e-05	0.00294623	3.03335	Blm	Bloom syndrome, RecQ helicase-like
243	10523128	13.1583	6.83429e-05	0.00294623	29.8407	Ppbp	pro-platelet basic protein
244	10379646	13.1503	6.86241e-05	0.00294623	2.51656	Slfn3	schlafen 3
245	10362593	13.1441	6.89054e-05	0.00294623	1.71682	NA	NA
246	10554938	-13.1408	6.91866e-05	0.00294623	0.242895	Rab30	RAB30, member RAS oncogene family
247	10450063	13.1071	6.94679e-05	0.00294623	1.45959	NA	NA
248	10526069	13.0977	6.97491e-05	0.00294623	2.12766	Cct6a	chaperonin containing Tcp1, subunit 6a (zeta)
249	10591869	-13.0506	7.00304e-05	0.00294623	0.668088	Herpud2	HERPUD family member 2
250	10537452	12.9907	7.03116e-05	0.00294623	1.88764	NA	NA
251	10361186	-12.9874	7.05929e-05	0.00294623	0.174494	Sertad4	SERTA domain containing 4
252	10371012	12.9727	7.08741e-05	0.00294623	1.68502	Lmnb2	lamin B2
253	10454782	-12.9713	7.11554e-05	0.00294623	0.242504	Egr1	early growth response 1
254	10583450	-12.9642	7.14366e-05	0.00294623	0.440673	Zfp846	zinc finger protein 846
255	10371379	-12.9604	7.17179e-05	0.00294623	0.0807883	Nuak1	NUAK family, SNF1-like kinase, 1
256	10582599	12.9383	7.22803e-05	0.00295268	2.19014	Nup133	nucleoporin 133
257	10381096	12.9228	7.25616e-05	0.00295268	9.26866	Igfbp4	insulin-like growth factor binding protein 4
258	10375382	-12.8972	7.28428e-05	0.00295268	0.458078	Clint1	clathrin interactor 1
259	10375240	12.8854	7.31241e-05	0.00295268	3.12374	Hspd1	heat shock protein 1 (chaperonin)
260	10424400	12.8773	7.34053e-05	0.00295268	5.75444	Myc	myelocytomatosis oncogene
261	10359422	12.8754	7.36866e-05	0.00295268	2.41933	Prdx6	peroxiredoxin 6
262	10356312	12.8647	7.39678e-05	0.00295268	2.08919	Ncl	nucleolin
263	10561994	-12.8617	7.42491e-05	0.00295268	0.567035	Lin37	lin-37 homolog (C. elegans)
264	10372877	12.8475	7.45303e-05	0.00295268	2.44122	Xpot	exportin, tRNA (nuclear export receptor for tRNAs)
265	10376196	12.8403	7.48116e-05	0.00295268	2.64963	Hint1	histidine triad nucleotide binding protein 1
266	10593887	-12.8005	7.50928e-05	0.00295268	0.135995	Neil1	nei endonuclease VIII-like 1 (E. coli)
267	10493137	12.7982	7.53741e-05	0.00295268	2.63948	Iqgap3	IQ motif containing GTPase activating protein 3
268	10357391	12.7928	7.56553e-05	0.00295268	1.61601	Zranb3	zinc finger, RAN-binding domain containing 3
269	10421526	-12.7829	7.59366e-05	0.00295268	0.356851	Rb1	retinoblastoma 1
270	10448214	-12.7765	7.62178e-05	0.00295268	0.5665	Zfp944	zinc finger protein 944
271	10582020	12.7671	7.6499e-05	0.00295268	3.51878	Gcsh	glycine cleavage system protein H (aminomethyl carrier)
272	10403057	-12.7253	7.67803e-05	0.00295268	0.0789797	NA	NA
273	10408477	12.7121	7.70615e-05	0.00295268	2.75167	E2f3	E2F transcription factor 3
274	10540540	-12.7113	7.73428e-05	0.00295268	0.624907	Brox	BRO1 domain and CAAX motif containing
275	10551359	-12.7079	7.7624e-05	0.00295268	0.573243	Sertad1	SERTA domain containing 1
276	10586405	-12.6869	7.79053e-05	0.00295268	0.483598	NA	NA
277	10346780	12.683	7.81865e-05	0.00295268	1.3737	NA	NA
278	10538875	-12.6606	7.84678e-05	0.00295268	0.164111	NA	NA
279	10553788	12.6474	7.8749e-05	0.00295268	6.0978	Atp10a	ATPase, class V, type 10A
280	10433088	12.6333	7.90303e-05	0.00295268	3.07855	Cbx5	chromobox 5
281	10377605	12.6308	7.93115e-05	0.00295268	3.27604	Tmem256	transmembrane protein 256
282	10551355	-12.6276	7.95928e-05	0.00295268	0.449634	Sertad3	SERTA domain containing 3
283	10409968	12.6141	7.9874e-05	0.00295268	1.52869	Rps18	ribosomal protein S18
284	10360648	-12.613	8.01552e-05	0.00295268	0.544538	Psen2	presenilin 2
285	10478447	-12.6063	8.04365e-05	0.00295268	0.566037	Stk4	serine/threonine kinase 4
286	10605349	-12.6025	8.07177e-05	0.00295268	0.880017	G6pdx	glucose-6-phosphate dehydrogenase X-linked
287	10405236	12.5919	8.0999e-05	0.00295268	2.0591	Sfxn1	sideroflexin 1
288	10546631	12.5861	8.12802e-05	0.00295268	9.17528	Frmd4b	FERM domain containing 4B
289	10457872	12.5777	8.15615e-05	0.00295268	2.85296	Slc39a6	solute carrier family 39 (metal ion transporter), member 6
290	10581625	-12.5544	8.18427e-05	0.00295268	0.619484	Ist1	increased sodium tolerance 1 homolog (yeast)
291	10375402	-12.5539	8.2124e-05	0.00295268	0.0753268	Adam19	a disintegrin and metallopeptidase domain 19 (meltrin beta)
292	10528546	-12.5415	8.24052e-05	0.00295268	0.616345	Gabarapl2	gamma-aminobutyric acid (GABA) A receptor-associated protein-like 2
293	10494735	-12.5281	8.26865e-05	0.00295268	0.435448	Gdap2	ganglioside-induced differentiation-associated-protein 2
294	10346634	12.5263	8.29677e-05	0.00295268	3.23554	Nop58	NOP58 ribonucleoprotein
295	10434670	-12.4935	8.3249e-05	0.00295268	0.520147	NA	NA
296	10519224	12.4895	8.35302e-05	0.00295268	1.94508	Pusl1	pseudouridylate synthase-like 1
297	10340464	12.4879	8.38115e-05	0.00295268	2.47371	NA	NA
298	10583952	12.4718	8.40927e-05	0.00295268	1.77022	Ncapd3	non-SMC condensin II complex, subunit D3
299	10367641	12.4667	8.43739e-05	0.00295268	2.25827	Mthfd1l	methylenetetrahydrofolate dehydrogenase (NADP+ dependent) 1-like
300	10349593	-12.4562	8.46552e-05	0.00295268	0.0216217	Faim3	Fas apoptotic inhibitory molecule 3
301	10400581	12.4542	8.49364e-05	0.00295268	2.70052	Fkbp3	FK506 binding protein 3
302	10456383	12.4444	8.52177e-05	0.00295268	2.54062	Impa2	inositol (myo)-1(or 4)-monophosphatase 2
303	10338515	12.4267	8.54989e-05	0.00295268	1.97521	NA	NA
304	10399391	12.425	8.57802e-05	0.00295268	3.33817	Gen1	Gen homolog 1, endonuclease (Drosophila)
305	10363498	12.4125	8.60614e-05	0.00295268	4.48187	Ppa1	pyrophosphatase (inorganic) 1
306	10506680	12.4073	8.63427e-05	0.00295268	3.33787	Ndc1	NDC1 transmembrane nucleoporin
307	10419354	-12.3987	8.66239e-05	0.00295268	0.454736	NA	NA
308	10366814	12.3984	8.69052e-05	0.00295268	1.71016	Cdk4	cyclin-dependent kinase 4
309	10557631	-12.3951	8.71864e-05	0.00295268	0.501438	Prr14	proline rich 14
310	10404904	-12.3927	8.74677e-05	0.00295268	0.266551	Rbm24	RNA binding motif protein 24
311	10387659	12.3889	8.77489e-05	0.00295268	3.0724	Nlgn2	neuroligin 2
312	10572456	-12.387	8.80301e-05	0.00295268	0.224365	Jund	jun D proto-oncogene
313	10453825	12.3793	8.83114e-05	0.00295268	2.29162	NA	NA
314	10597182	12.3656	8.85926e-05	0.00295268	2.22528	Nbeal2	neurobeachin-like 2
315	10483648	12.3578	8.88739e-05	0.00295268	1.87275	Ola1	Obg-like ATPase 1
316	10471978	-12.3485	8.91551e-05	0.00295268	0.518923	Epc2	enhancer of polycomb homolog 2 (Drosophila)
317	10546762	-12.3414	8.94364e-05	0.00295268	0.294934	Il5ra	interleukin 5 receptor, alpha
318	10505674	12.3364	8.97176e-05	0.00295268	3.37394	Cntln	centlein, centrosomal protein
319	10431424	12.3362	8.99989e-05	0.00295268	4.96927	Plxnb2	plexin B2
320	10389701	12.3124	9.02801e-05	0.00295268	2.74173	Akap1	A kinase (PRKA) anchor protein 1
321	10340217	-12.3066	9.05614e-05	0.00295268	0.496712	NA	NA
322	10477637	-12.3	9.08426e-05	0.00295268	0.456326	Map1lc3a	microtubule-associated protein 1 light chain 3 alpha
323	10451110	12.2909	9.11239e-05	0.00295268	1.31827	Hsp90ab1	heat shock protein 90 alpha (cytosolic), class B member 1
324	10416736	12.2814	9.14051e-05	0.00295268	3.83738	Bora	bora, aurora kinase A activator
325	10588849	-12.2739	9.16864e-05	0.00295268	0.581241	Amigo3	adhesion molecule with Ig like domain 3
326	10579799	-12.2659	9.19676e-05	0.00295268	0.567172	Tmem184c	transmembrane protein 184C
327	10340240	12.2573	9.22488e-05	0.00295268	6.73357	NA	NA
328	10523717	12.2554	9.25301e-05	0.00295268	12.1667	Spp1	secreted phosphoprotein 1
329	10582981	12.2529	9.28113e-05	0.00295268	2.8545	Tfdp1	transcription factor Dp 1
330	10396610	12.2496	9.30926e-05	0.00295268	4.3194	Mthfd1	methylenetetrahydrofolate dehydrogenase (NADP+ dependent), methenyltetrahydrofolate cyclohydrolase, formyltetrahydrofolate synthase
331	10437257	-12.2305	9.33738e-05	0.00295268	0.42728	Zfp597	zinc finger protein 597
332	10394674	12.226	9.36551e-05	0.00295268	9.44199	NA	NA
333	10510391	12.2213	9.39363e-05	0.00295268	3.94101	Srm	spermidine synthase
334	10382956	-12.1986	9.42176e-05	0.00295268	0.455783	Tmc8	transmembrane channel-like gene family 8
335	10354258	12.1973	9.44988e-05	0.00295268	1.86836	Uxs1	UDP-glucuronate decarboxylase 1
336	10509122	-12.1715	9.47801e-05	0.00295268	0.126022	Cnr2	cannabinoid receptor 2 (macrophage)
337	10595404	-12.1533	9.50613e-05	0.00295268	0.227284	Fam46a	family with sequence similarity 46, member A
338	10458834	-12.1365	9.53426e-05	0.00295268	0.575854	Atg12	autophagy related 12
339	10607361	-12.1352	9.59051e-05	0.00295268	0.804332	NA	NA
340	10602675	-12.1352	9.59051e-05	0.00295268	0.804332	NA	NA
341	10366476	12.1302	9.61863e-05	0.00295268	3.9972	Ptprb	protein tyrosine phosphatase, receptor type, B
342	10409170	-12.1248	9.64675e-05	0.00295268	0.312929	Fgd3	FYVE, RhoGEF and PH domain containing 3
343	10596148	12.1157	9.67488e-05	0.00295268	7.18358	NA	NA
344	10445268	12.1093	9.703e-05	0.00295268	5.06085	Gpr116	G protein-coupled receptor 116
345	10600825	-12.0797	9.73113e-05	0.00295268	0.551613	Zc3h12b	zinc finger CCCH-type containing 12B
346	10424404	12.0792	9.75925e-05	0.00295268	3.40544	Pvt1	plasmacytoma variant translocation 1
347	10382022	12.0563	9.78738e-05	0.00295268	1.24671	Taco1	translational activator of mitochondrially encoded cytochrome c oxidase I
348	10510546	12.0309	9.8155e-05	0.00295268	1.84966	NA	NA
349	10524790	12.0267	9.84363e-05	0.00295268	3.16643	Cit	citron
350	10603373	-12.0076	9.87175e-05	0.00295268	0.436047	Pqbp1	polyglutamine binding protein 1
351	10549802	12.0041	9.89988e-05	0.00295268	1.58186	NA	NA
352	10499854	11.9998	9.928e-05	0.00295268	3.87522	S100a1	S100 calcium binding protein A1
353	10359851	11.9994	9.95613e-05	0.00295268	4.45654	Uck2	uridine-cytidine kinase 2
354	10382047	-11.9901	9.98425e-05	0.00295268	0.350593	Gm10840	predicted gene 10840
355	10407209	-11.9837	0.000100124	0.00295268	0.405896	Slc38a9	solute carrier family 38, member 9
356	10603431	11.9801	0.000100405	0.00295268	1.88782	Suv39h1	suppressor of variegation 3-9 homolog 1 (Drosophila)
357	10518358	-11.9794	0.000100686	0.00295268	0.140162	2610305D13Rik	RIKEN cDNA 2610305D13 gene
358	10338411	-11.9482	0.000100967	0.00295268	0.636664	NA	NA
359	10470283	11.9402	0.000101249	0.00295268	5.83883	Egfl7	EGF-like domain 7
360	10533182	-11.9313	0.00010153	0.00295268	0.1845	Dtx1	deltex 1 homolog (Drosophila)
361	10435982	-11.9188	0.000101811	0.00295268	0.0718863	Btla	B and T lymphocyte associated
362	10438220	-11.9156	0.000102092	0.00295268	0.38793	Car15	carbonic anhydrase 15
363	10453114	-11.9103	0.000102374	0.00295268	0.54621	Dhx57	DEAH (Asp-Glu-Ala-Asp/His) box polypeptide 57
364	10344497	11.8965	0.000102655	0.00295268	1.68534	NA	NA
365	10391918	-11.8931	0.000102936	0.00295268	0.416014	Plekhm1	pleckstrin homology domain containing, family M (with RUN domain) member 1
366	10458913	-11.8868	0.000103217	0.00295268	0.561845	Cep120	centrosomal protein 120
367	10501244	11.8806	0.000103499	0.00295268	1.80534	Ampd2	adenosine monophosphate deaminase 2
368	10575255	11.8804	0.00010378	0.00295268	4.79627	Pkd1l3	polycystic kidney disease 1 like 3
369	10417972	11.8626	0.000104061	0.00295268	1.82003	Camk2g	calcium/calmodulin-dependent protein kinase II gamma
370	10339491	11.854	0.000104342	0.00295268	5.32313	NA	NA
371	10550730	-11.8328	0.000104624	0.00295268	0.233433	Zfp296	zinc finger protein 296
372	10371591	11.8303	0.000104905	0.00295268	4.32466	Parpbp	PARP1 binding protein
373	10527801	11.8267	0.000105186	0.00295268	3.57541	Brca2	breast cancer 2
374	10366796	11.8213	0.000105467	0.00295268	3.5183	Mettl1	methyltransferase like 1
375	10526972	11.8122	0.000105749	0.00295268	1.87051	Nudt1	nudix (nucleoside diphosphate linked moiety X)-type motif 1
376	10341380	11.8097	0.00010603	0.00295268	3.76701	NA	NA
377	10524169	11.7794	0.000106311	0.00295268	4.10621	Pole	polymerase (DNA directed), epsilon
378	10450034	-11.7768	0.000106592	0.00295268	0.503015	Rab11b	RAB11B, member RAS oncogene family
379	10530516	-11.7427	0.000106874	0.00295268	0.692452	Txk	TXK tyrosine kinase
380	10503098	-11.7409	0.000107155	0.00295268	0.417422	NA	NA
381	10382912	11.7277	0.000107436	0.00295268	2.7874	40057	septin 9
382	10604405	11.7176	0.000107717	0.00295268	1.53197	Aifm1	apoptosis-inducing factor, mitochondrion-associated 1
383	10407570	-11.7137	0.000107999	0.00295268	0.567081	Zmynd11	zinc finger, MYND domain containing 11
384	10597920	11.7119	0.00010828	0.00295268	1.46279	Zdhhc3	zinc finger, DHHC domain containing 3
385	10447317	11.7087	0.000108561	0.00295268	7.27764	Epas1	endothelial PAS domain protein 1
386	10607346	-11.7061	0.000108842	0.00295268	0.461182	Tspyl2	TSPY-like 2
387	10365749	11.7056	0.000109124	0.00295268	2.27099	Lta4h	leukotriene A4 hydrolase
388	10506154	11.6994	0.000109405	0.00295268	2.7085	Alg6	asparagine-linked glycosylation 6 (alpha-1,3,-glucosyltransferase)
389	10545588	11.695	0.000109686	0.00295268	2.19479	Hk2	hexokinase 2
390	10411393	11.6771	0.000109967	0.00295268	1.43558	Rps18	ribosomal protein S18
391	10379204	11.6742	0.000110249	0.00295268	2.06211	Poldip2	polymerase (DNA-directed), delta interacting protein 2
392	10401939	-11.6738	0.00011053	0.00295268	0.633104	Lysmd1	LysM, putative peptidoglycan-binding, domain containing 1
393	10375234	11.6635	0.000110811	0.00295268	3.93645	Nudcd2	NudC domain containing 2
394	10419296	11.6572	0.000111092	0.00295268	2.89573	Wdhd1	WD repeat and HMG-box DNA binding protein 1
395	10475767	-11.6465	0.000111374	0.00295268	0.642568	Tmem127	transmembrane protein 127
396	10482687	-11.6452	0.000111655	0.00295268	0.370702	Arl5a	ADP-ribosylation factor-like 5A
397	10568174	11.6398	0.000111936	0.00295268	2.12643	Spn	sialophorin
398	10399178	11.6366	0.000112217	0.00295268	4.1672	Cdca7l	cell division cycle associated 7 like
399	10461012	-11.6163	0.000112499	0.00295268	0.4012	Trmt112	tRNA methyltransferase 11-2
400	10580282	-11.6161	0.00011278	0.00295268	0.246788	Junb	jun B proto-oncogene
401	10399874	11.6157	0.000113061	0.00295268	3.15436	Bcap29	B cell receptor associated protein 29
402	10479749	11.6004	0.000113342	0.00295268	2.81714	Rpp38	ribonuclease P/MRP 38 subunit
403	10599487	-11.5652	0.000113624	0.00295268	0.595918	Sash3	SAM and SH3 domain containing 3
404	10606744	11.5512	0.000113905	0.00295268	1.20506	NA	NA
405	10593988	-11.5448	0.000114186	0.00295268	0.633947	Clk3	CDC-like kinase 3
406	10445241	11.533	0.000114467	0.00295268	3.76139	Tnfrsf21	tumor necrosis factor receptor superfamily, member 21
407	10342839	-11.5125	0.000114749	0.00295268	0.602239	NA	NA
408	10560481	-11.5072	0.00011503	0.00295268	0.110848	Fosb	FBJ osteosarcoma oncogene B
409	10394538	11.5036	0.000115311	0.00295268	3.1041	NA	NA
410	10523579	-11.5001	0.000115592	0.00295268	0.191831	Arhgap24	Rho GTPase activating protein 24
411	10365005	-11.4898	0.000115874	0.00295268	0.627781	Dapk3	death-associated protein kinase 3
412	10410560	11.487	0.000116155	0.00295268	3.85786	Trip13	thyroid hormone receptor interactor 13
413	10458195	11.4857	0.000116436	0.00295268	3.28788	Cdc25c	cell division cycle 25C
414	10400030	11.4816	0.000116717	0.00295268	2.0624	Bzw2	basic leucine zipper and W2 domains 2
415	10338106	-11.4806	0.000116999	0.00295268	0.651978	NA	NA
416	10408220	-11.4805	0.00011728	0.00295268	0.461348	NA	NA
417	10554370	-11.468	0.000117561	0.00295268	0.421109	Zfp710	zinc finger protein 710
418	10460344	-11.4679	0.000117842	0.00295268	0.702808	Tmem134	transmembrane protein 134
419	10495945	11.461	0.000118124	0.00295268	2.85305	Zgrf1	zinc finger, GRF-type containing 1
420	10341699	11.4501	0.000118405	0.00295268	1.96584	NA	NA
421	10393970	11.4391	0.000118686	0.00295268	2.59983	Fasn	fatty acid synthase
422	10339886	11.4319	0.000118967	0.00295268	6.432	NA	NA
423	10344063	-11.4227	0.000119249	0.00295268	0.373242	NA	NA
424	10539574	11.417	0.00011953	0.00295268	2.30744	NA	NA
425	10427428	-11.4147	0.000119811	0.00295268	0.629306	AW549877	expressed sequence AW549877
426	10498180	-11.4064	0.000120092	0.00295268	0.751956	Rfxap	regulatory factor X-associated protein
427	10391178	-11.3706	0.000120373	0.00295268	0.618669	Dnajc7	DnaJ (Hsp40) homolog, subfamily C, member 7
428	10591369	11.3681	0.000120655	0.00295268	1.94411	Dnmt1	DNA methyltransferase (cytosine-5) 1
429	10542275	11.358	0.000120936	0.00295268	2.07128	Etv6	ets variant 6
430	10344404	11.3402	0.000121217	0.00295268	4.34314	NA	NA
431	10503617	11.3373	0.000121498	0.00295268	2.7164	Mms22l	MMS22-like, DNA repair protein
432	10400137	-11.3335	0.00012178	0.00295268	0.326879	Dnajb9	DnaJ (Hsp40) homolog, subfamily B, member 9
433	10339191	-11.3318	0.000122061	0.00295268	0.571472	NA	NA
434	10343844	11.3307	0.000122342	0.00295268	2.63432	NA	NA
435	10506301	11.2954	0.000122623	0.00295268	3.22548	Lepr	leptin receptor
436	10470893	11.2899	0.000122905	0.00295268	2.01143	NA	NA
437	10356878	-11.2886	0.000123186	0.00295268	0.207539	NA	NA
438	10370914	-11.278	0.000123467	0.00295268	0.696392	Abhd17a	abhydrolase domain containing 17A
439	10343381	-11.2729	0.000123748	0.00295268	0.329639	NA	NA
440	10455595	11.272	0.00012403	0.00295268	1.54416	NA	NA
441	10371002	11.2702	0.000124311	0.00295268	2.02232	Lsm7	LSM7 homolog, U6 small nuclear RNA associated (S. cerevisiae)
442	10389451	-11.2576	0.000124592	0.00295268	0.483998	Med13	mediator complex subunit 13
443	10582809	11.2558	0.000124873	0.00295268	2.9654	Tk1	thymidine kinase 1
444	10405163	-11.2553	0.000125155	0.00295268	0.565586	Spin1	spindlin 1
445	10545130	-11.2469	0.000125436	0.00295268	0.362813	Gadd45a	growth arrest and DNA-damage-inducible 45 alpha
446	10551169	-11.2444	0.000125717	0.00295268	0.222585	B3gnt8	UDP-GlcNAc:betaGal beta-1,3-N-acetylglucosaminyltransferase 8
447	10375503	-11.2432	0.000125998	0.00295268	0.362719	Trim7	tripartite motif-containing 7
448	10444223	-11.2291	0.00012628	0.00295268	0.240311	H2-Oa	histocompatibility 2, O region alpha locus
449	10376292	11.2286	0.000126561	0.00295268	1.92018	Larp1	La ribonucleoprotein domain family, member 1
450	10449807	-11.2266	0.000126842	0.00295268	0.522607	Ephx3	epoxide hydrolase 3
451	10374400	11.2237	0.000127123	0.00295268	2.65837	Fbxo48	F-box protein 48
452	10340431	11.2236	0.000127405	0.00295268	4.05891	NA	NA
453	10361760	11.2168	0.000127686	0.00295268	3.5409	Timm8a1	translocase of inner mitochondrial membrane 8A1
454	10497996	-11.2105	0.000127967	0.00295268	0.549232	Ikzf5	IKAROS family zinc finger 5
455	10343971	11.2061	0.000128248	0.00295268	4.48979	NA	NA
456	10492428	-11.1983	0.00012853	0.00295268	0.219239	Tiparp	TCDD-inducible poly(ADP-ribose) polymerase
457	10406968	11.1931	0.000128811	0.00295268	4.14146	Cenpk	centromere protein K
458	10449236	11.1857	0.000129373	0.00295569	5.45261	Nme4	NME/NM23 nucleoside diphosphate kinase 4
459	10411974	11.1772	0.000129655	0.00295569	2.16556	Ipo11	importin 11
460	10600301	11.1755	0.000129936	0.00295569	1.87423	Ssr4	signal sequence receptor, delta
461	10583942	11.1659	0.000130217	0.00295569	3.32038	Thyn1	thymocyte nuclear protein 1
462	10556206	11.1643	0.000130498	0.00295569	2.06254	NA	NA
463	10384691	11.1561	0.00013078	0.00295569	2.81324	0610010F05Rik	RIKEN cDNA 0610010F05 gene
464	10487371	-11.1547	0.000131061	0.00295569	0.638232	Ciao1	cytosolic iron-sulfur protein assembly 1
465	10561104	11.1349	0.000131342	0.00295569	5.88319	Axl	AXL receptor tyrosine kinase
466	10583145	-11.1279	0.000131623	0.00295569	0.453202	Tmem123	transmembrane protein 123
467	10372583	-11.1175	0.000131905	0.00295569	0.410999	Rab3ip	RAB3A interacting protein
468	10441107	11.1106	0.000132186	0.00295569	2.75605	Psmg1	proteasome (prosome, macropain) assembly chaperone 1
469	10380381	-11.0968	0.000132467	0.00295569	0.312784	Tob1	transducer of ErbB-2.1
470	10512574	-11.093	0.000132748	0.00295569	0.594239	Gba2	glucosidase beta 2
471	10393058	-11.0687	0.00013303	0.00295569	0.751581	NA	NA
472	10531370	-11.0682	0.000133311	0.00295569	0.418576	Naaa	N-acylethanolamine acid amidase
473	10536541	11.0672	0.000133592	0.00295569	2.82055	St7	suppression of tumorigenicity 7
474	10338917	11.0478	0.000133873	0.00295569	3.18668	NA	NA
475	10449041	11.0367	0.000134155	0.00295569	1.99264	Metrn	meteorin, glial cell differentiation regulator
476	10562073	-11.035	0.000134436	0.00295569	0.662936	Rbm42	RNA binding motif protein 42
477	10437311	11.0292	0.000134717	0.00295569	1.91354	Trap1	TNF receptor-associated protein 1
478	10480849	11.0257	0.000134998	0.00295569	2.8417	Fcna	ficolin A
479	10343572	11.0215	0.00013528	0.00295569	1.67427	NA	NA
480	10599627	11.0179	0.000135561	0.00295569	2.13216	Hprt	hypoxanthine guanine phosphoribosyl transferase
481	10341242	-11.0161	0.000135842	0.00295569	0.647189	NA	NA
482	10405971	11.0085	0.000136123	0.00295569	2.00881	Nsun2	NOL1/NOP2/Sun domain family member 2
483	10561078	-10.9986	0.000136405	0.00295569	0.537957	Ccdc97	coiled-coil domain containing 97
484	10503315	10.9976	0.000136686	0.00295569	3.10904	NA	NA
485	10414514	10.9946	0.000136967	0.00295569	8.01622	Pnp	purine-nucleoside phosphorylase
486	10531724	10.9879	0.000137248	0.00295569	3.65135	Plac8	placenta-specific 8
487	10366774	-10.9874	0.00013753	0.00295569	0.650723	Avil	advillin
488	10373313	-10.9781	0.000137811	0.00295569	0.382688	Nab2	Ngfi-A binding protein 2
489	10517508	10.9526	0.000138092	0.00295569	11.2269	C1qb	complement component 1, q subcomponent, beta polypeptide
490	10507394	-10.9485	0.000138373	0.00295569	0.574792	Hectd3	HECT domain containing 3
491	10550098	10.9374	0.000138655	0.00295569	2.94074	Wdr12	WD repeat domain 12
492	10338219	-10.9321	0.000138936	0.00295569	0.21811	NA	NA
493	10536429	-10.9211	0.000139217	0.00295569	0.380738	Tmem106b	transmembrane protein 106B
494	10589913	-10.9149	0.000139498	0.00295569	0.661312	Dync1li1	dynein cytoplasmic 1 light intermediate chain 1
495	10340318	-10.9144	0.00013978	0.00295569	0.526346	NA	NA
496	10500140	10.8977	0.000140061	0.00295569	2.81306	Anxa9	annexin A9
497	10574087	-10.8894	0.000140342	0.00295569	0.429344	Herpud1	homocysteine-inducible, endoplasmic reticulum stress-inducible, ubiquitin-like domain member 1
498	10570432	10.8893	0.000140623	0.00295569	2.04617	NA	NA
499	10344592	10.8789	0.000140904	0.00295569	4.23785	NA	NA
500	10552252	10.8742	0.000141186	0.00295569	1.90436	1600014C10Rik	RIKEN cDNA 1600014C10 gene
501	10343983	-10.8725	0.000141467	0.00295569	0.43439	NA	NA
502	10368277	10.8718	0.000141748	0.00295569	3.56188	NA	NA
503	10480423	-10.871	0.000142029	0.00295569	0.566245	Abi1	abl-interactor 1
504	10577326	10.8681	0.000142311	0.00295569	2.40587	Xkr5	X Kell blood group precursor-related family, member 5
505	10456601	-10.8578	0.000142592	0.00295569	0.740052	Cxxc1	CXXC finger 1 (PHD domain)
506	10384373	10.8573	0.000142873	0.00295569	3.67112	Fignl1	fidgetin-like 1
507	10469712	10.8472	0.000143154	0.00295569	2.76117	Pdss1	prenyl (solanesyl) diphosphate synthase, subunit 1
508	10381548	10.841	0.000143436	0.00295569	2.20915	BC030867	cDNA sequence BC030867
509	10569014	10.8299	0.000143717	0.00295569	6.65454	Ifitm2	interferon induced transmembrane protein 2
510	10472916	10.8215	0.000143998	0.00295569	3.69082	Cdca7	cell division cycle associated 7
511	10402063	-10.821	0.000144279	0.00295569	0.371798	Foxn3	forkhead box N3
512	10407192	-10.8209	0.000144561	0.00295569	0.358643	Slc38a9	solute carrier family 38, member 9
513	10448803	10.8209	0.000144842	0.00295569	2.53692	Hn1l	hematological and neurological expressed 1-like
514	10512236	10.816	0.000145123	0.00295569	2.69343	Kif24	kinesin family member 24
515	10343788	10.8125	0.000145404	0.00295569	1.98148	NA	NA
516	10567663	10.811	0.000145686	0.00295569	1.90366	Palb2	partner and localizer of BRCA2
517	10586781	-10.8079	0.000145967	0.00295569	0.105447	Myo1e	myosin IE
518	10374068	-10.7994	0.000146248	0.00295569	0.359004	Dbnl	drebrin-like
519	10343557	-10.7966	0.000146529	0.00295569	0.590051	NA	NA
520	10409567	10.7892	0.000146811	0.00295569	5.66576	Tifab	TRAF-interacting protein with forkhead-associated domain, family member B
521	10398972	10.7873	0.000147092	0.00295569	1.9962	Mta1	metastasis associated 1
522	10340490	10.768	0.000147373	0.00295569	1.54404	NA	NA
523	10372069	10.7646	0.000147654	0.00295569	3.73713	Socs2	suppressor of cytokine signaling 2
524	10517443	-10.7639	0.000147936	0.00295569	0.635409	Tceb3	transcription elongation factor B (SIII), polypeptide 3
525	10527508	10.7566	0.000148217	0.00295569	1.56331	Cdk8	cyclin-dependent kinase 8
526	10338556	-10.7551	0.000148498	0.00295569	0.542645	NA	NA
527	10519855	-10.7438	0.000148779	0.00295569	0.210472	Cacna2d1	calcium channel, voltage-dependent, alpha2/delta subunit 1
528	10472846	10.7427	0.000149061	0.00295569	3.32725	Pdk1	pyruvate dehydrogenase kinase, isoenzyme 1
529	10502359	-10.741	0.000149342	0.00295569	0.488329	Dapp1	dual adaptor for phosphotyrosine and 3-phosphoinositides 1
530	10433311	-10.7393	0.000149623	0.00295569	0.510744	Mgrn1	mahogunin, ring finger 1
531	10375941	10.7388	0.000149904	0.00295569	1.82223	Vdac1	voltage-dependent anion channel 1
532	10378088	10.7205	0.000150186	0.00295569	2.34753	Mybbp1a	MYB binding protein (P160) 1a
533	10554325	10.7064	0.000150467	0.00295569	4.17119	Ticrr	TOPBP1-interacting checkpoint and replication regulator
534	10511865	10.7054	0.000150748	0.00295569	2.04379	NA	NA
535	10583297	10.7029	0.000151029	0.00295569	2.12683	Taf1d	TATA box binding protein (Tbp)-associated factor, RNA polymerase I, D
536	10409206	10.6951	0.000151311	0.00295569	1.80743	NA	NA
537	10403273	-10.6946	0.000151592	0.00295569	0.378078	Asb13	ankyrin repeat and SOCS box-containing 13
538	10397530	10.6938	0.000151873	0.00295569	2.84713	Slirp	SRA stem-loop interacting RNA binding protein
539	10378453	10.6893	0.000152154	0.00295569	2.02277	Cluh	clustered mitochondria (cluA/CLU1) homolog
540	10389114	10.6872	0.000152436	0.00295569	1.62375	Nle1	notchless homolog 1 (Drosophila)
541	10468653	-10.687	0.000152717	0.00295569	0.382763	Ccdc186	coiled-coil domain containing 186
542	10339354	10.6742	0.000152998	0.00295569	2.15506	NA	NA
543	10607002	10.6705	0.000153279	0.00295569	1.15753	NA	NA
544	10603011	10.6587	0.000153561	0.00295569	1.81122	Rbbp7	retinoblastoma binding protein 7
545	10452110	10.6564	0.000153842	0.00295569	1.55818	2410015M20Rik	RIKEN cDNA 2410015M20 gene
546	10523960	10.6522	0.000154123	0.00295569	1.43168	Pigg	phosphatidylinositol glycan anchor biosynthesis, class G
547	10486858	-10.6474	0.000154404	0.00295569	0.632811	NA	NA
548	10414522	10.6458	0.000154686	0.00295569	3.30824	Apex1	apurinic/apyrimidinic endonuclease 1
549	10431371	-10.6453	0.000154967	0.00295569	0.508049	Hdac10	histone deacetylase 10
550	10469849	10.6409	0.000155248	0.00295569	2.43061	Zmynd19	zinc finger, MYND domain containing 19
551	10555946	-10.6407	0.000155529	0.00295569	0.411295	Smpd1	sphingomyelin phosphodiesterase 1, acid lysosomal
552	10386628	-10.6366	0.000155811	0.00295569	0.37048	Natd1	N-acetyltransferase domain containing 1
553	10419779	10.6364	0.000156092	0.00295569	2.07264	Haus4	HAUS augmin-like complex, subunit 4
554	10583326	-10.6323	0.000156373	0.00295569	0.152311	Slc36a4	solute carrier family 36 (proton/amino acid symporter), member 4
555	10525887	10.6261	0.000156654	0.00295569	2.63891	Bri3bp	Bri3 binding protein
556	10601705	10.6238	0.000156936	0.00295569	3.98764	Cenpi	centromere protein I
557	10453057	10.6167	0.000157217	0.00295569	3.74648	Cyp1b1	cytochrome P450, family 1, subfamily b, polypeptide 1
558	10402314	10.6127	0.000157498	0.00295569	1.25536	Btbd7	BTB (POZ) domain containing 7
559	10536620	-10.6121	0.000157779	0.00295569	0.461552	Ing3	inhibitor of growth family, member 3
560	10388065	10.6063	0.000158061	0.00295569	1.57067	Nlrp1b	NLR family, pyrin domain containing 1B
561	10357436	10.6037	0.000158342	0.00295569	3.41145	Mcm6	minichromosome maintenance deficient 6 (MIS5 homolog, S. pombe) (S. cerevisiae)
562	10341107	-10.6025	0.000158623	0.00295569	0.555152	NA	NA
563	10420035	10.5993	0.000158904	0.00295569	2.271	Ipo4	importin 4
564	10422728	10.5987	0.000159186	0.00295569	5.60253	Dab2	disabled 2, mitogen-responsive phosphoprotein
565	10576896	10.588	0.000159467	0.00295569	1.82561	Gm9457	predicted gene 9457
566	10530851	10.5867	0.000159748	0.00295569	1.68187	NA	NA
567	10371676	10.5843	0.000160029	0.00295569	2.39141	Utp20	UTP20, small subunit (SSU) processome component, homolog (yeast)
568	10339463	-10.5837	0.00016031	0.00295569	0.262111	NA	NA
569	10522024	-10.5725	0.000160592	0.00295569	0.40208	Tbc1d1	TBC1 domain family, member 1
570	10368508	10.5712	0.000160873	0.00295569	2.42184	Cenpw	centromere protein W
571	10372668	-10.5667	0.000161154	0.00295569	0.561619	Mdm2	transformed mouse 3T3 cell double minute 2
572	10365420	-10.5659	0.000161435	0.00295569	0.506763	Tmem263	transmembrane protein 263
573	10371506	10.5592	0.000161717	0.00295569	3.9973	Stab2	stabilin 2
574	10579144	-10.5582	0.000161998	0.00295569	0.63899	Mau2	MAU2 chromatid cohesion factor homolog (C. elegans)
575	10392970	-10.5516	0.000162279	0.00295569	0.29522	Mif4gd	MIF4G domain containing
576	10352709	10.5501	0.00016256	0.00295569	2.73983	Nsl1	NSL1, MIND kinetochore complex component, homolog (S. cerevisiae)
577	10364373	10.54	0.000162842	0.00295569	2.07869	Lsm7	LSM7 homolog, U6 small nuclear RNA associated (S. cerevisiae)
578	10454414	-10.5399	0.000163123	0.00295569	0.671334	Pik3c3	phosphoinositide-3-kinase, class 3
579	10360018	-10.532	0.000163404	0.00295569	0.0448552	Fcrla	Fc receptor-like A
580	10434668	10.5303	0.000163685	0.00295569	4.67892	Tmem97	transmembrane protein 97
581	10511935	-10.5204	0.000163967	0.00295569	0.461823	Pnrc1	proline-rich nuclear receptor coactivator 1
582	10340929	-10.5174	0.000164248	0.00295569	0.578787	NA	NA
583	10512265	-10.5061	0.000164529	0.00295569	0.629541	Fam219a	family with sequence similarity 219, member A
584	10585680	-10.4983	0.00016481	0.00295569	0.468355	NA	NA
585	10557716	-10.4948	0.000165092	0.00295569	0.670132	Rnf40	ring finger protein 40
586	10437443	-10.4909	0.000165373	0.00295569	0.43119	Cdip1	cell death inducing Trp53 target 1
587	10486867	-10.4865	0.000165654	0.00295569	0.633508	NA	NA
588	10338179	-10.4837	0.000165935	0.00295569	0.612061	NA	NA
589	10583312	10.4834	0.000166217	0.00295569	3.94947	Taf1d	TATA box binding protein (Tbp)-associated factor, RNA polymerase I, D
590	10404354	10.4679	0.000166498	0.00295569	1.54181	NA	NA
591	10344234	-10.466	0.000166779	0.00295569	0.496756	NA	NA
592	10549361	10.4659	0.00016706	0.00295569	2.3673	Tm7sf3	transmembrane 7 superfamily member 3
593	10496737	-10.4645	0.000167342	0.00295569	0.488825	Bcl10	B cell leukemia/lymphoma 10
594	10471108	-10.4601	0.000167623	0.00295569	0.442797	Gpr107	G protein-coupled receptor 107
595	10443063	-10.4513	0.000167904	0.00295569	0.424112	Phf1	PHD finger protein 1
596	10591947	10.4436	0.000168185	0.00295569	2.22318	Acad8	acyl-Coenzyme A dehydrogenase family, member 8
597	10536898	-10.4309	0.000168467	0.00295569	0.423929	Irf5	interferon regulatory factor 5
598	10574880	-10.4135	0.000168748	0.00295569	0.687836	Tsnaxip1	translin-associated factor X (Tsnax) interacting protein 1
599	10463625	-10.4118	0.000169029	0.00295569	0.616409	Fbxl15	F-box and leucine-rich repeat protein 15
600	10445412	-10.4069	0.00016931	0.00295569	0.321246	Nfkbie	nuclear factor of kappa light polypeptide gene enhancer in B cells inhibitor, epsilon
601	10476660	10.4038	0.000169592	0.00295569	1.74812	Mgme1	mitochondrial genome maintainance exonuclease 1
602	10360985	10.4022	0.000169873	0.00295569	3.63149	Cenpf	centromere protein F
603	10529133	-10.3883	0.000170154	0.00295569	0.532572	Zfp513	zinc finger protein 513
604	10456206	-10.3814	0.000170435	0.00295569	0.610148	Wdr7	WD repeat domain 7
605	10404132	-10.3758	0.000170717	0.00295569	0.422685	Cmah	cytidine monophospho-N-acetylneuraminic acid hydroxylase
606	10410355	-10.3724	0.000170998	0.00295569	0.604485	A530054K11Rik	RIKEN cDNA A530054K11 gene
607	10384555	-10.3593	0.000171279	0.00295569	0.565633	Aftph	aftiphilin
608	10358434	10.3569	0.00017156	0.00295569	4.96004	Pla2g4a	phospholipase A2, group IVA (cytosolic, calcium-dependent)
609	10460202	-10.3498	0.000171842	0.00295569	0.481024	Suv420h1	suppressor of variegation 4-20 homolog 1 (Drosophila)
610	10414433	10.3446	0.000172123	0.00295569	2.55528	Tmem260	transmembrane protein 260
611	10435329	10.3362	0.000172404	0.00295569	2.03626	Ccdc14	coiled-coil domain containing 14
612	10525657	10.3237	0.000172685	0.00295569	1.76037	Denr	density-regulated protein
613	10365578	10.3225	0.000172967	0.00295569	3.21365	Nup37	nucleoporin 37
614	10438308	10.3197	0.000173248	0.00295569	2.04663	Ranbp1	RAN binding protein 1
615	10460392	-10.3046	0.000173529	0.00295569	0.392461	Pold4	polymerase (DNA-directed), delta 4
616	10421877	10.2953	0.00017381	0.00295569	2.92192	Diap3	diaphanous homolog 3 (Drosophila)
617	10604076	10.2888	0.000174092	0.00295569	3.15094	Snora69	small nucleolar RNA, H/ACA box 69
618	10338459	10.2879	0.000174373	0.00295569	3.87623	NA	NA
619	10530806	10.2783	0.000174654	0.00295569	3.45695	Ppat	phosphoribosyl pyrophosphate amidotransferase
620	10556216	10.2778	0.000174935	0.00295569	2.4098	Ipo7	importin 7
621	10500896	-10.2676	0.000175217	0.00295569	0.73585	H3f3b	H3 histone, family 3B
622	10518069	10.2672	0.000175498	0.00295569	1.91491	Efhd2	EF hand domain containing 2
623	10438911	10.2648	0.000175779	0.00295569	2.16362	Atp13a3	ATPase type 13A3
624	10479463	10.2428	0.000176342	0.00295723	4.13081	Slc17a9	solute carrier family 17, member 9
625	10341857	-10.2424	0.000176623	0.00295723	0.571812	NA	NA
626	10581306	10.2337	0.000176904	0.00295723	1.27786	NA	NA
627	10390763	-10.2337	0.000177185	0.00295723	0.201711	Ccr7	chemokine (C-C motif) receptor 7
628	10383756	10.2328	0.000177467	0.00295723	7.87333	NA	NA
629	10338231	10.2303	0.000177748	0.00295723	2.1636	NA	NA
630	10541268	-10.2299	0.000178029	0.00295723	0.248984	Slc25a18	solute carrier family 25 (mitochondrial carrier), member 18
631	10486819	10.227	0.00017831	0.00295723	1.3728	Catsper2	cation channel, sperm associated 2
632	10545226	-10.2263	0.000178592	0.00295723	0.542797	NA	NA
633	10386427	-10.2163	0.000178873	0.00295723	0.642463	Flcn	folliculin
634	10546346	10.2157	0.000179154	0.00295723	2.51219	Chchd4	coiled-coil-helix-coiled-coil-helix domain containing 4
635	10464618	-10.2128	0.000179435	0.00295723	0.604643	Rps6kb2	ribosomal protein S6 kinase, polypeptide 2
636	10576883	10.2083	0.000179717	0.00295723	4.22074	Shcbp1	Shc SH2-domain binding protein 1
637	10581507	-10.207	0.000179998	0.00295723	0.662419	NA	NA
638	10574027	10.2024	0.000180279	0.00295723	3.30266	Mt1	metallothionein 1
639	10378627	-10.2003	0.00018056	0.00295723	0.741438	Rilp	Rab interacting lysosomal protein
640	10354732	10.1997	0.000180841	0.00295723	3.40583	Hspd1	heat shock protein 1 (chaperonin)
641	10343551	10.1958	0.000181123	0.00295723	5.93382	NA	NA
642	10350113	-10.1901	0.000181404	0.00295723	0.591091	Arl8a	ADP-ribosylation factor-like 8A
643	10469070	10.186	0.000181685	0.00295723	1.89346	Nudt5	nudix (nucleoside diphosphate linked moiety X)-type motif 5
644	10404840	-10.184	0.000181966	0.00295723	0.161789	Cd83	CD83 antigen
645	10446756	-10.1827	0.000182248	0.00295723	0.364699	Ypel5	yippee-like 5 (Drosophila)
646	10407766	-10.1796	0.000182529	0.00295723	0.558531	Lgals8	lectin, galactose binding, soluble 8
647	10587486	10.1769	0.00018281	0.00295723	1.93124	NA	NA
648	10557488	-10.1748	0.000183091	0.00295723	0.268778	Tbx6	T-box 6
649	10451481	-10.1704	0.000183373	0.00295723	0.416355	Gltscr1l	GLTSCR1-like
650	10402020	-10.1663	0.000183654	0.00295723	0.470595	Eml5	echinoderm microtubule associated protein like 5
651	10362359	10.1654	0.000183935	0.00295723	2.30114	NA	NA
652	10391221	10.1631	0.000184216	0.00295723	2.28408	Kat2a	K(lysine) acetyltransferase 2A
653	10401564	-10.1571	0.000184498	0.00295723	0.452991	Arel1	apoptosis resistant E3 ubiquitin protein ligase 1
654	10520622	-10.1504	0.000184779	0.00295723	0.41751	Abhd1	abhydrolase domain containing 1
655	10589420	10.1412	0.00018506	0.00295723	2.74232	Cdc25a	cell division cycle 25A
656	10403361	10.1327	0.000185341	0.00295723	2.02353	Pitrm1	pitrilysin metallepetidase 1
657	10458349	-10.1293	0.000185623	0.00295723	0.60974	Sra1	steroid receptor RNA activator 1
658	10598422	-10.1276	0.000185904	0.00295723	0.518519	Gripap1	GRIP1 associated protein 1
659	10340502	10.1236	0.000186185	0.00295723	2.15286	NA	NA
660	10570373	10.122	0.000186466	0.00295723	2.80657	Tfdp1	transcription factor Dp 1
661	10496359	10.1169	0.000186748	0.00295723	7.24857	Emcn	endomucin
662	10341299	10.1144	0.000187029	0.00295723	1.48769	NA	NA
663	10453721	-10.1096	0.00018731	0.00295723	0.697706	Wac	WW domain containing adaptor with coiled-coil
664	10532944	10.1018	0.000187591	0.00295723	1.94261	Mlec	malectin
665	10544610	10.101	0.000187873	0.00295723	8.19033	Igf2bp3	insulin-like growth factor 2 mRNA binding protein 3
666	10481900	10.1006	0.000188154	0.00295723	1.59406	Rabepk	Rab9 effector protein with kelch motifs
667	10527252	-10.0976	0.000188435	0.00295723	0.615363	Eif2ak1	eukaryotic translation initiation factor 2 alpha kinase 1
668	10537909	10.0923	0.000188716	0.00295723	4.05533	Rny3	RNA, Y3 small cytoplasmic (associated with Ro protein)
669	10340377	10.0861	0.000188998	0.00295723	4.13821	NA	NA
670	10474093	-10.0831	0.000189279	0.00295723	0.432935	2810002D19Rik	RIKEN cDNA 2810002D19 gene
671	10568221	10.0826	0.00018956	0.00295723	2.01104	Sephs2	selenophosphate synthetase 2
672	10373454	10.0823	0.000189841	0.00295723	2.46851	Pa2g4	proliferation-associated 2G4
673	10355864	-10.0811	0.000190123	0.00295723	0.689525	Chpf	chondroitin polymerizing factor
674	10583340	10.0809	0.000190404	0.00295723	1.74684	Npm1	nucleophosmin 1
675	10412100	-10.0768	0.000190685	0.00295723	0.484749	Map3k1	mitogen-activated protein kinase kinase kinase 1
676	10465831	10.0756	0.000190966	0.00295723	3.8357	5730408K05Rik	RIKEN cDNA 5730408K05 gene
677	10478994	-10.0724	0.000191248	0.00295723	0.566048	Fam209	family with sequence similarity 209
678	10599607	10.067	0.000191529	0.00295723	1.24777	NA	NA
679	10348666	-10.052	0.00019181	0.00295723	0.768512	Dusp28	dual specificity phosphatase 28
680	10466439	10.0507	0.000192091	0.00295723	2.37391	NA	NA
681	10486112	-10.0454	0.000192373	0.00295723	0.220473	Bmf	BCL2 modifying factor
682	10606689	10.0428	0.000192654	0.00295723	3.43081	Timm8a1	translocase of inner mitochondrial membrane 8A1
683	10528257	-10.0388	0.000192935	0.00295723	0.518764	Rsbn1l	round spermatid basic protein 1-like
684	10344240	-10.037	0.000193216	0.00295723	0.566023	NA	NA
685	10380219	-10.0298	0.000193498	0.00295723	0.389665	Vezf1	vascular endothelial zinc finger 1
686	10552380	-10.0278	0.000193779	0.00295723	0.128382	Siglecg	sialic acid binding Ig-like lectin G
687	10436561	-10.0253	0.00019406	0.00295723	0.574348	Usp25	ubiquitin specific peptidase 25
688	10478160	10.023	0.000194341	0.00295723	1.83685	Fam83d	family with sequence similarity 83, member D
689	10581535	10.0173	0.000194623	0.00295723	1.51509	NA	NA
690	10338738	-10.0165	0.000194904	0.00295723	0.34427	NA	NA
691	10342276	-10.0118	0.000195185	0.00295723	0.503972	NA	NA
692	10455588	10.0103	0.000195466	0.00295723	2.49289	Hspe1	heat shock protein 1 (chaperonin 10)
693	10588826	-10.0061	0.000195748	0.00295723	0.623193	Ip6k1	inositol hexaphosphate kinase 1
694	10379820	9.99434	0.000196029	0.00295723	2.97161	Acaca	acetyl-Coenzyme A carboxylase alpha
695	10598456	-9.99181	0.00019631	0.00295723	0.611896	Otud5	OTU domain containing 5
696	10338761	9.98539	0.000196591	0.00295723	1.74167	NA	NA
697	10353420	9.98414	0.000196873	0.00295723	2.48325	Mcm3	minichromosome maintenance deficient 3 (S. cerevisiae)
698	10461156	9.97208	0.000197154	0.00295723	4.31128	Snhg1	small nucleolar RNA host gene 1
699	10555179	9.97184	0.000197435	0.00295723	1.84538	Prkrir	protein-kinase, interferon-inducible double stranded RNA dependent inhibitor, repressor of (P58 repressor)
700	10582390	9.96768	0.000197716	0.00295723	1.74375	Aprt	adenine phosphoribosyl transferase
701	10586604	9.96648	0.000197998	0.00295723	2.66798	Rps27l	ribosomal protein S27-like
702	10542355	9.96555	0.000198279	0.00295723	7.26466	Emp1	epithelial membrane protein 1
703	10453049	-9.96528	0.00019856	0.00295723	0.287196	Cdc42ep3	CDC42 effector protein (Rho GTPase binding) 3
704	10402864	-9.96498	0.000198841	0.00295723	0.355396	NA	NA
705	10461162	9.95854	0.000199123	0.00295723	2.63863	NA	NA
706	10349733	9.95778	0.000199404	0.00295723	1.96916	Nucks1	nuclear casein kinase and cyclin-dependent kinase substrate 1
707	10416945	9.95267	0.000199685	0.00295723	2.73323	Mir17hg	Mir17 host gene 1 (non-protein coding)
708	10411728	9.9518	0.000199966	0.00295723	3.75686	Cenph	centromere protein H
709	10385572	-9.9387	0.000200247	0.00295723	0.52087	Sqstm1	sequestosome 1
710	10586110	9.93591	0.000200529	0.00295723	4.27047	Cln6	ceroid-lipofuscinosis, neuronal 6
711	10364030	-9.93569	0.00020081	0.00295723	0.480514	Adora2a	adenosine A2a receptor
712	10339980	9.92612	0.000201091	0.00295723	2.51101	NA	NA
713	10451123	9.9222	0.000201372	0.00295723	3.46506	Slc29a1	solute carrier family 29 (nucleoside transporters), member 1
714	10526311	-9.92208	0.000201654	0.00295723	0.581335	Bcl7b	B cell CLL/lymphoma 7B
715	10401422	-9.9195	0.000201935	0.00295723	0.511108	Pnma1	paraneoplastic antigen MA1
716	10549282	-9.90883	0.000202216	0.00295723	0.426992	Itpr2	inositol 1,4,5-triphosphate receptor 2
717	10461154	9.90256	0.000202497	0.00295723	3.87797	Snhg1	small nucleolar RNA host gene 1
718	10581036	-9.90059	0.000202779	0.00295723	0.36606	Tk2	thymidine kinase 2, mitochondrial
719	10484389	9.89664	0.00020306	0.00295723	5.37618	Tfpi	tissue factor pathway inhibitor
720	10426557	9.89616	0.000203341	0.00295723	1.91078	Pfkm	phosphofructokinase, muscle
721	10457302	-9.89443	0.000203622	0.00295723	0.541394	Epc1	enhancer of polycomb homolog 1 (Drosophila)
722	10344089	-9.88518	0.000203904	0.00295723	0.539393	NA	NA
723	10544596	9.88356	0.000204185	0.00295723	15.6622	Tmem176b	transmembrane protein 176B
724	10452525	9.88276	0.000204466	0.00295723	1.609	Ndufv2	NADH dehydrogenase (ubiquinone) flavoprotein 2
725	10594800	-9.8824	0.000204747	0.00295723	0.307504	Fam63b	family with sequence similarity 63, member B
726	10339448	-9.87547	0.000205029	0.00295723	0.546611	NA	NA
727	10345141	-9.87023	0.00020531	0.00295723	0.331537	Lmbrd1	LMBR1 domain containing 1
728	10501661	-9.862	0.000205591	0.00295723	0.671908	NA	NA
729	10459188	9.86084	0.000205872	0.00295723	1.25744	NA	NA
730	10343560	-9.8598	0.000206154	0.00295723	0.551593	NA	NA
731	10525374	-9.85927	0.000206435	0.00295723	0.527973	Pptc7	PTC7 protein phosphatase homolog (S. cerevisiae)
732	10338529	-9.85438	0.000206716	0.00295723	0.778937	NA	NA
733	10433963	9.84848	0.000206997	0.00295723	2.28401	Ydjc	YdjC homolog (bacterial)
734	10382136	-9.84815	0.000207279	0.00295723	0.499455	1810010H24Rik	RIKEN cDNA 1810010H24 gene
735	10405619	-9.84629	0.00020756	0.00295723	0.513227	Idnk	idnK gluconokinase homolog (E. coli)
736	10562192	9.83684	0.000207841	0.00295723	2.09497	Fxyd5	FXYD domain-containing ion transport regulator 5
737	10356657	9.83346	0.000208122	0.00295723	1.34912	Ndufa10	NADH dehydrogenase (ubiquinone) 1 alpha subcomplex 10
738	10409236	-9.8308	0.000208404	0.00295723	0.478244	NA	NA
739	10480804	9.83055	0.000208685	0.00295723	2.01276	NA	NA
740	10498448	9.83024	0.000208966	0.00295723	9.58009	Plch1	phospholipase C, eta 1
741	10606102	-9.82957	0.000209247	0.00295723	0.166069	Phka1	phosphorylase kinase alpha 1
742	10341308	9.82549	0.000209529	0.00295723	5.99243	NA	NA
743	10528915	9.82522	0.00020981	0.00295723	4.65277	Tyms	thymidylate synthase
744	10382106	9.82345	0.000210091	0.00295723	1.65386	Milr1	mast cell immunoglobulin like receptor 1
745	10539143	9.82214	0.000210372	0.00295723	2.95661	Retsat	retinol saturase (all trans retinol 13,14 reductase)
746	10417787	-9.82178	0.000210654	0.00295723	0.492199	Gng2	guanine nucleotide binding protein (G protein), gamma 2
747	10393714	-9.81894	0.000210935	0.00295723	0.675249	Enthd2	ENTH domain containing 2
748	10553299	9.80838	0.000211216	0.00295723	7.06459	Gm5331	predicted gene 5331
749	10593490	9.8071	0.000211497	0.00295723	1.31812	Gm6981	glyceraldehyde-3-phosphate dehydrogenase pseudogene
750	10434745	9.79729	0.000211779	0.00295723	4.06801	NA	NA
751	10478401	-9.78307	0.00021206	0.00295723	0.273182	Ttpal	tocopherol (alpha) transfer protein-like
752	10517463	-9.76743	0.000212341	0.00295723	0.683857	Luzp1	leucine zipper protein 1
753	10523923	9.76338	0.000212622	0.00295723	2.27582	Ccdc18	coiled-coil domain containing 18
754	10573713	9.76247	0.000212904	0.00295723	2.39256	Heatr3	HEAT repeat containing 3
755	10532741	9.75084	0.000213185	0.00295723	14.4273	Tmem119	transmembrane protein 119
756	10343182	-9.74609	0.000213466	0.00295723	0.608284	NA	NA
757	10529375	-9.7454	0.000213747	0.00295723	0.475402	Mxd4	Max dimerization protein 4
758	10570630	9.74213	0.000214029	0.00295723	2.10519	NA	NA
759	10481092	9.74145	0.00021431	0.00295723	2.62955	Agpat2	1-acylglycerol-3-phosphate O-acyltransferase 2 (lysophosphatidic acid acyltransferase, beta)
760	10508089	9.73768	0.000214591	0.00295723	1.63425	Mrps15	mitochondrial ribosomal protein S15
761	10446376	-9.73241	0.000214872	0.00295723	0.424459	Man2a1	mannosidase 2, alpha 1
762	10379363	9.73086	0.000215154	0.00295723	2.78407	Atad5	ATPase family, AAA domain containing 5
763	10427166	9.72855	0.000215435	0.00295723	3.89348	Espl1	extra spindle pole bodies 1 (S. cerevisiae)
764	10346303	9.72777	0.000215716	0.00295723	2.38307	Hspe1	heat shock protein 1 (chaperonin 10)
765	10373202	9.72299	0.000215997	0.00295723	2.44255	Shmt2	serine hydroxymethyltransferase 2 (mitochondrial)
766	10551347	-9.72291	0.000216279	0.00295723	0.225648	Blvrb	biliverdin reductase B (flavin reductase (NADPH))
767	10590968	9.72283	0.00021656	0.00295723	2.34873	Ankrd49	ankyrin repeat domain 49
768	10359648	9.71743	0.000216841	0.00295723	2.26236	BC055324	cDNA sequence BC055324
769	10473432	-9.71237	0.000217122	0.00295723	0.505449	Tnks1bp1	tankyrase 1 binding protein 1
770	10422227	-9.70678	0.000217404	0.00295723	0.476522	Spry2	sprouty homolog 2 (Drosophila)
771	10354816	-9.70177	0.000217685	0.00295723	0.545862	Clk1	CDC-like kinase 1
772	10527571	-9.70134	0.000217966	0.00295723	0.498638	NA	NA
773	10591614	9.69876	0.000218247	0.00295723	2.04428	Dock6	dedicator of cytokinesis 6
774	10376312	9.69687	0.000218529	0.00295723	2.57943	Larp1	La ribonucleoprotein domain family, member 1
775	10519324	9.6867	0.00021881	0.00295723	4.74761	Cdk6	cyclin-dependent kinase 6
776	10605465	-9.67773	0.000219091	0.00295723	0.519372	Prkx	protein kinase, X-linked
777	10501199	-9.67645	0.000219372	0.00295723	0.560084	Gstm7	glutathione S-transferase, mu 7
778	10455483	-9.67466	0.000219654	0.00295723	0.482182	Ythdc2	YTH domain containing 2
779	10344608	9.66832	0.000219935	0.00295723	3.88019	NA	NA
780	10406672	9.66697	0.000220216	0.00295723	3.00591	Arsb	arylsulfatase B
781	10386543	9.66629	0.000220497	0.00295723	1.68354	Gm12620	poly(A) binding protein, cytoplasmic 4 pseudogene
782	10568417	9.66526	0.000220778	0.00295723	1.31549	Mcmbp	MCM (minichromosome maintenance deficient) binding protein
783	10562911	-9.66164	0.00022106	0.00295723	0.604448	Tbc1d17	TBC1 domain family, member 17
784	10524150	-9.66123	0.000221341	0.00295723	0.722114	Ankle2	ankyrin repeat and LEM domain containing 2
785	10441811	9.65237	0.000221622	0.00295723	2.17814	Tcp1	t-complex protein 1
786	10479099	9.65111	0.000221903	0.00295723	1.83552	Npepl1	aminopeptidase-like 1
787	10367076	9.63886	0.000222185	0.00295723	3.00028	Prim1	DNA primase, p49 subunit
788	10465336	-9.63879	0.000222466	0.00295723	0.471466	Mrpl49	mitochondrial ribosomal protein L49
789	10388409	9.63707	0.000222747	0.00295723	1.63485	Rpa1	replication protein A1
790	10405211	-9.62916	0.000223028	0.00295723	0.381108	Gadd45g	growth arrest and DNA-damage-inducible 45 gamma
791	10529410	9.62386	0.00022331	0.00295723	1.97222	Mfsd10	major facilitator superfamily domain containing 10
792	10520048	-9.61893	0.000223591	0.00295723	0.509111	Kmt2e	lysine (K)-specific methyltransferase 2E
793	10590549	9.61796	0.000223872	0.00295723	2.17593	Exosc7	exosome component 7
794	10368011	-9.61289	0.000224153	0.00295723	0.643554	Vta1	Vps20-associated 1 homolog (S. cerevisiae)
795	10538420	9.60667	0.000224435	0.00295723	1.86963	Gars	glycyl-tRNA synthetase
796	10409330	-9.6004	0.000224716	0.00295723	0.598349	4833439L19Rik	RIKEN cDNA 4833439L19 gene
797	10356084	-9.58477	0.000224997	0.00295723	0.320673	Irs1	insulin receptor substrate 1
798	10343447	-9.5815	0.000225278	0.00295723	0.558661	NA	NA
799	10510034	-9.5798	0.00022556	0.00295723	0.40581	Casp9	caspase 9
800	10535927	9.57579	0.000225841	0.00295723	2.61907	NA	NA
801	10538939	-9.5752	0.000226122	0.00295723	0.318689	Eif2ak3	eukaryotic translation initiation factor 2 alpha kinase 3
802	10342466	-9.56607	0.000226403	0.00295723	0.614776	NA	NA
803	10344317	-9.56281	0.000226685	0.00295723	0.599604	NA	NA
804	10342460	9.56154	0.000226966	0.00295723	1.57934	NA	NA
805	10552276	-9.55844	0.000227528	0.00295942	0.407123	Ube2h	ubiquitin-conjugating enzyme E2H
806	10438415	-9.55577	0.00022781	0.00295942	0.0862537	Iglv1	immunoglobulin lambda variable 1
807	10342996	-9.55342	0.000228091	0.00295942	0.418421	NA	NA
808	10598180	9.54994	0.000228372	0.00295942	1.53655	BC085271	protein phosphatase 2A inhibitor-2 I-2PP2A-related
809	10561063	-9.54472	0.000228653	0.00295942	0.563271	Bckdha	branched chain ketoacid dehydrogenase E1, alpha polypeptide
810	10540738	9.54288	0.000228935	0.00295942	3.694	Fancd2	Fanconi anemia, complementation group D2
811	10565567	-9.54127	0.000229216	0.00295942	0.513847	4632427E13Rik	RIKEN cDNA 4632427E13 gene
812	10342764	9.53603	0.000229497	0.00295942	4.66366	NA	NA
813	10386548	9.5336	0.000229778	0.00295942	1.70505	Gm12620	poly(A) binding protein, cytoplasmic 4 pseudogene
814	10445033	-9.52824	0.00023006	0.00295942	0.521791	Trim26	tripartite motif-containing 26
815	10474836	-9.52284	0.000230341	0.00295942	0.500553	Ivd	isovaleryl coenzyme A dehydrogenase
816	10411804	-9.52215	0.000230622	0.00295942	0.222829	Mast4	microtubule associated serine/threonine kinase family member 4
817	10473919	9.52095	0.000230903	0.00295942	1.83345	Ckap5	cytoskeleton associated protein 5
818	10462346	9.51912	0.000231185	0.00295942	2.16094	Rcl1	RNA terminal phosphate cyclase-like 1
819	10513878	9.51321	0.000231466	0.00295942	1.55536	Rps18	ribosomal protein S18
820	10342180	9.50709	0.000231747	0.00295942	1.74656	NA	NA
821	10360012	-9.50671	0.000232028	0.00295942	0.675255	Fcrlb	Fc receptor-like B
822	10558769	9.50002	0.00023231	0.00295942	14.3912	Ifitm1	interferon induced transmembrane protein 1
823	10384233	9.48582	0.000232591	0.00295942	2.4382	Tns3	tensin 3
824	10352514	9.48042	0.000232872	0.00295942	1.87233	Eprs	glutamyl-prolyl-tRNA synthetase
825	10340957	-9.4804	0.000233153	0.00295942	0.673719	NA	NA
826	10505526	9.47845	0.000233435	0.00295942	1.28452	Tlr4	toll-like receptor 4
827	10464504	9.4717	0.000233716	0.00295942	4.23944	Lrp5	low density lipoprotein receptor-related protein 5
828	10423361	9.46395	0.000233997	0.00295942	1.33133	NA	NA
829	10437945	9.46057	0.000234278	0.00295942	1.99769	Mcm4	minichromosome maintenance deficient 4 homolog (S. cerevisiae)
830	10503723	9.45723	0.00023456	0.00295942	2.84689	Mdn1	midasin homolog (yeast)
831	10539649	9.45226	0.000234841	0.00295942	2.14965	Ptges3	prostaglandin E synthase 3 (cytosolic)
832	10493193	9.45152	0.000235122	0.00295942	2.20421	Cct3	chaperonin containing Tcp1, subunit 3 (gamma)
833	10545125	9.45106	0.000235403	0.00295942	1.27904	NA	NA
834	10341621	9.44862	0.000235685	0.00295942	4.9078	NA	NA
835	10425966	9.44433	0.000235966	0.00295942	1.8358	Atxn10	ataxin 10
836	10588577	9.44285	0.000236247	0.00295942	6.46592	Cish	cytokine inducible SH2-containing protein
837	10558454	9.44074	0.000236528	0.00295942	3.78331	Glrx3	glutaredoxin 3
838	10379795	-9.43976	0.00023681	0.00295942	0.462431	Synrg	synergin, gamma
839	10600593	9.43974	0.000237091	0.00295942	1.48054	Hnrnpa3	heterogeneous nuclear ribonucleoprotein A3
840	10387733	9.43928	0.000237372	0.00295942	1.45308	Eif5a	eukaryotic translation initiation factor 5A
841	10597288	9.43693	0.000237653	0.00295942	2.16759	Mlh1	mutL homolog 1 (E. coli)
842	10535084	9.43283	0.000237935	0.00295942	1.99297	3110082I17Rik	RIKEN cDNA 3110082I17 gene
843	10425138	9.43091	0.000238216	0.00295942	1.91325	Sh3bp1	SH3-domain binding protein 1
844	10470050	9.42738	0.000238497	0.00295942	2.61793	Abca2	ATP-binding cassette, sub-family A (ABC1), member 2
845	10456378	-9.42685	0.000238778	0.00295942	0.474483	Chmp1b	charged multivesicular body protein 1B
846	10443009	9.41983	0.00023906	0.00295942	2.61361	Ergic1	endoplasmic reticulum-golgi intermediate compartment (ERGIC) 1
847	10343637	-9.4181	0.000239341	0.00295942	0.610732	NA	NA
848	10516266	-9.40864	0.000239622	0.00295942	0.387792	Zc3h12a	zinc finger CCCH type containing 12A
849	10338765	-9.39887	0.000239903	0.00295942	0.475572	NA	NA
850	10560709	9.39809	0.000240184	0.00295942	2.10109	Pvr	poliovirus receptor
851	10390484	-9.39703	0.000240466	0.00295942	0.708001	Cwc25	CWC25 spliceosome-associated protein homolog (S. cerevisiae)
852	10341832	9.38186	0.000240747	0.00295942	1.78943	NA	NA
853	10343808	-9.37636	0.000241028	0.00295942	0.441361	NA	NA
854	10419611	9.3741	0.000241309	0.00295942	1.4588	Supt16	suppressor of Ty 16
855	10480725	-9.36829	0.000241591	0.00295942	0.567817	BC029214	cDNA sequence BC029214
856	10569319	9.36687	0.000241872	0.00295942	3.24255	Ctsd	cathepsin D
857	10534324	9.36644	0.000242153	0.00295942	2.35593	Limk1	LIM-domain containing, protein kinase
858	10469954	-9.36618	0.000242434	0.00295942	0.68045	Tmem203	transmembrane protein 203
859	10585732	-9.36513	0.000242716	0.00295942	0.501627	Ulk3	unc-51-like kinase 3
860	10403558	-9.36285	0.000242997	0.00295942	0.200579	Ero1lb	ERO1-like beta (S. cerevisiae)
861	10600921	9.36224	0.000243278	0.00295942	1.98987	Stard8	START domain containing 8
862	10579812	9.36089	0.000243559	0.00295942	1.93496	Ednra	endothelin receptor type A
863	10419073	-9.3568	0.000243841	0.00295942	0.588795	Tspan14	tetraspanin 14
864	10488482	-9.35206	0.000244122	0.00295942	0.247694	Acss1	acyl-CoA synthetase short-chain family member 1
865	10355037	9.35111	0.000244403	0.00295942	3.34069	Wdr12	WD repeat domain 12
866	10472195	-9.34736	0.000244684	0.00295942	0.432456	Nudt15	nudix (nucleoside diphosphate linked moiety X)-type motif 15
867	10339488	9.34601	0.000244966	0.00295942	3.46576	NA	NA
868	10437160	-9.34213	0.000245247	0.00295942	0.28055	Ets2	E26 avian leukemia oncogene 2, 3' domain
869	10477894	-9.34088	0.000245528	0.00295942	0.73656	Gm14168	predicted gene 14168
870	10523647	-9.3402	0.000245809	0.00295942	0.453612	Aff1	AF4/FMR2 family, member 1
871	10500181	9.33795	0.000246091	0.00295942	1.68215	NA	NA
872	10509620	-9.33696	0.000246372	0.00295942	0.643897	Capzb	capping protein (actin filament) muscle Z-line, beta
873	10438262	9.33616	0.000246653	0.00295942	2.58349	Slc25a1	solute carrier family 25 (mitochondrial carrier, citrate transporter), member 1
874	10419267	9.33372	0.000246934	0.00295942	1.92653	Cnih1	cornichon homolog 1 (Drosophila)
875	10341625	-9.33278	0.000247216	0.00295942	0.268961	NA	NA
876	10523778	-9.32824	0.000247497	0.00295942	0.627314	NA	NA
877	10590245	-9.32813	0.000247778	0.00295942	0.521256	Slc25a38	solute carrier family 25, member 38
878	10342597	9.32716	0.000248059	0.00295942	2.90055	NA	NA
879	10420021	-9.32264	0.000248341	0.00295942	0.418753	A730061H03Rik	RIKEN cDNA A730061H03 gene
880	10574023	9.32126	0.000248622	0.00295942	6.24828	Mt2	metallothionein 2
881	10343535	-9.32119	0.000248903	0.00295942	0.793429	NA	NA
882	10388517	9.31823	0.000249184	0.00295942	1.83865	NA	NA
883	10400546	-9.31586	0.000249466	0.00295942	0.460791	Fbxo33	F-box protein 33
884	10484920	9.31454	0.000249747	0.00295942	2.52013	Ptpmt1	protein tyrosine phosphatase, mitochondrial 1
885	10433027	-9.31221	0.000250028	0.00295942	0.677301	Npff	neuropeptide FF-amide peptide precursor
886	10536472	-9.3087	0.000250309	0.00295942	0.409638	Mdfic	MyoD family inhibitor domain containing
887	10495935	9.28642	0.000250591	0.00295942	2.56123	Zgrf1	zinc finger, GRF-type containing 1
888	10342521	9.27737	0.000250872	0.00295942	2.98156	NA	NA
889	10350392	9.27117	0.000251153	0.00295942	4.22148	Aspm	asp (abnormal spindle)-like, microcephaly associated (Drosophila)
890	10588927	-9.27053	0.000251434	0.00295942	0.62411	1700102P08Rik	RIKEN cDNA 1700102P08 gene
891	10406278	9.26697	0.000251716	0.00295942	1.28342	NA	NA
892	10388234	9.25442	0.000251997	0.00295942	2.2448	Gsg2	germ cell-specific gene 2
893	10461497	9.25031	0.000252278	0.00295942	1.53919	Ddb1	damage specific DNA binding protein 1
894	10485483	9.2489	0.000252559	0.00295942	2.25018	Nat10	N-acetyltransferase 10
895	10431874	9.24599	0.000253122	0.00296214	1.68062	Slc38a1	solute carrier family 38, member 1
896	10365098	9.24586	0.000253403	0.00296214	2.57423	Tbxa2r	thromboxane A2 receptor
897	10386551	-9.24503	0.000253684	0.00296214	0.648704	Flii	flightless I homolog (Drosophila)
898	10388938	-9.2445	0.000253966	0.00296214	0.662077	Wsb1	WD repeat and SOCS box-containing 1
899	10390746	9.24381	0.000254247	0.00296214	1.54116	Top2a	topoisomerase (DNA) II alpha
900	10446027	9.24285	0.000254528	0.00296214	2.47803	Chaf1a	chromatin assembly factor 1, subunit A (p150)
901	10341867	-9.24269	0.000254809	0.00296214	0.382039	NA	NA
902	10342052	-9.24257	0.000255091	0.00296214	0.545576	NA	NA
903	10558971	9.23931	0.000255372	0.00296214	1.99132	Ap2a2	adaptor-related protein complex 2, alpha 2 subunit
904	10552812	-9.23579	0.000255653	0.00296214	0.704948	Irf3	interferon regulatory factor 3
905	10463911	-9.23515	0.000255934	0.00296214	0.381265	Add3	adducin 3 (gamma)
906	10436983	-9.23404	0.000256216	0.00296214	0.433311	Dopey2	dopey family member 2
907	10460726	-9.23279	0.000256497	0.00296214	0.779107	Fau	Finkel-Biskis-Reilly murine sarcoma virus (FBR-MuSV) ubiquitously expressed (fox derived)
908	10369911	-9.23144	0.000256778	0.00296214	0.385046	Gucd1	guanylyl cyclase domain containing 1
909	10550597	-9.23011	0.000257059	0.00296214	0.562843	Fbxo46	F-box protein 46
910	10452047	9.22487	0.000257341	0.00296214	2.94491	Ptprs	protein tyrosine phosphatase, receptor type, S
911	10339453	-9.22484	0.000257622	0.00296214	0.542422	NA	NA
912	10343521	9.22445	0.000257903	0.00296214	1.94774	NA	NA
913	10404389	-9.22292	0.000258184	0.00296214	0.157034	Irf4	interferon regulatory factor 4
914	10546163	9.22202	0.000258466	0.00296214	2.28145	Mcm2	minichromosome maintenance deficient 2 mitotin (S. cerevisiae)
915	10473414	9.2214	0.000258747	0.00296214	1.50975	Ssrp1	structure specific recognition protein 1
916	10339559	9.22063	0.000259028	0.00296214	2.87553	NA	NA
917	10340173	9.21469	0.000259309	0.00296214	4.77217	NA	NA
918	10513020	9.21369	0.000259591	0.00296214	1.67185	Ikbkap	inhibitor of kappa light polypeptide enhancer in B cells, kinase complex-associated protein
919	10589466	9.21187	0.000259872	0.00296214	1.86294	Smarcc1	SWI/SNF related, matrix associated, actin dependent regulator of chromatin, subfamily c, member 1
920	10466172	-9.21025	0.000260153	0.00296214	0.0167223	Ms4a1	membrane-spanning 4-domains, subfamily A, member 1
921	10538150	9.20761	0.000260434	0.00296214	12.259	Tmem176a	transmembrane protein 176A
922	10574471	9.20137	0.000260715	0.00296214	2.28811	Cmtm3	CKLF-like MARVEL transmembrane domain containing 3
923	10340633	-9.20076	0.000260997	0.00296214	0.614573	NA	NA
924	10515981	-9.19177	0.000261278	0.00296214	0.346802	Mir30e	microRNA 30e
925	10492045	9.18985	0.000261559	0.00296214	1.47106	NA	NA
926	10568282	9.1877	0.00026184	0.00296214	1.4944	Bcl7c	B cell CLL/lymphoma 7C
927	10399087	9.17998	0.000262403	0.00296484	4.47497	Ncapg2	non-SMC condensin II complex, subunit G2
928	10532027	9.1794	0.000263247	0.00296484	1.20241	NA	NA
929	10523354	9.1794	0.000263247	0.00296484	1.20241	NA	NA
930	10384552	9.1794	0.000263247	0.00296484	1.20241	NA	NA
931	10342372	-9.17933	0.000263528	0.00296484	0.527518	NA	NA
932	10503370	9.17847	0.000263809	0.00296484	1.58037	NA	NA
933	10390050	9.17505	0.00026409	0.00296484	2.36984	Eme1	essential meiotic endonuclease 1 homolog 1 (S. pombe)
934	10354031	-9.17021	0.000264372	0.00296484	0.447578	Tsga10	testis specific 10
935	10580191	9.16915	0.000264653	0.00296484	3.48214	Nfix	nuclear factor I/X
936	10462973	9.16876	0.000264934	0.00296484	4.11156	Hells	helicase, lymphoid specific
937	10407782	-9.16531	0.000265215	0.00296484	0.12306	Edaradd	EDAR (ectodysplasin-A receptor)-associated death domain
938	10461152	9.16145	0.000265497	0.00296484	4.18629	Snhg1	small nucleolar RNA host gene 1
939	10427035	-9.15844	0.000265778	0.00296484	0.13995	Nr4a1	nuclear receptor subfamily 4, group A, member 1
940	10559853	-9.15604	0.000266059	0.00296484	0.574847	Clcn4-2	chloride channel 4-2
941	10468081	9.15506	0.00026634	0.00296484	2.62682	Npm3	nucleoplasmin 3
942	10343496	9.15264	0.000266622	0.00296484	3.45895	NA	NA
943	10366956	-9.15004	0.000266903	0.00296484	0.575861	Stat6	signal transducer and activator of transcription 6
944	10351041	9.14802	0.000267184	0.00296484	3.97692	NA	NA
945	10538901	9.14703	0.000267465	0.00296484	7.29011	BC005685	cDNA sequence BC005685
946	10606088	-9.1454	0.000267747	0.00296484	0.332694	Hdac8	histone deacetylase 8
947	10482496	9.14509	0.000268028	0.00296484	1.44779	NA	NA
948	10393113	-9.14336	0.000268309	0.00296484	0.514845	NA	NA
949	10343714	-9.13641	0.00026859	0.00296484	0.556322	NA	NA
950	10507309	-9.13526	0.000268872	0.00296484	0.445574	Ccdc17	coiled-coil domain containing 17
951	10348817	9.13344	0.000269434	0.00296728	1.50986	37500	septin 2
952	10477311	9.13236	0.000269715	0.00296728	1.76944	Asxl1	additional sex combs like 1
953	10402659	-9.12945	0.000269997	0.00296728	0.453469	Ankrd9	ankyrin repeat domain 9
954	10510452	-9.12751	0.000270278	0.00296728	0.726569	Dffa	DNA fragmentation factor, alpha subunit
955	10462632	9.12667	0.000270559	0.00296728	2.69571	Kif20b	kinesin family member 20B
956	10464045	9.12294	0.00027084	0.00296728	2.05476	Acsl5	acyl-CoA synthetase long-chain family member 5
957	10374934	-9.11849	0.000271122	0.00296728	0.444359	Psme4	proteasome (prosome, macropain) activator subunit 4
958	10439346	-9.1136	0.000271403	0.00296728	0.363978	Eaf2	ELL associated factor 2
959	10391348	-9.11048	0.000271684	0.00296728	0.578123	Fam134c	family with sequence similarity 134, member C
960	10398874	9.10954	0.000271965	0.00296728	2.44016	Siva1	SIVA1, apoptosis-inducing factor
961	10341942	-9.10717	0.000272247	0.00296728	0.193345	NA	NA
962	10536369	-9.10661	0.000272528	0.00296728	0.34947	C1galt1	core 1 synthase, glycoprotein-N-acetylgalactosamine 3-beta-galactosyltransferase, 1
963	10605659	9.09884	0.000272809	0.00296728	1.19616	NA	NA
964	10369890	9.09711	0.00027309	0.00296728	2.2555	NA	NA
965	10360834	-9.09551	0.000273372	0.00296728	0.452675	Hlx	H2.0-like homeobox
966	10435654	9.09322	0.000273653	0.00296728	1.62518	Lrrc58	leucine rich repeat containing 58
967	10409338	9.09192	0.000273934	0.00296728	2.04704	Nop16	NOP16 nucleolar protein
968	10365482	9.09078	0.000274215	0.00296728	10.5623	Timp3	tissue inhibitor of metalloproteinase 3
969	10485314	-9.08992	0.000274497	0.00296728	0.6403	Ttc17	tetratricopeptide repeat domain 17
970	10603316	9.0892	0.000274778	0.00296728	1.72004	2010204K13Rik	RIKEN cDNA 2010204K13 gene
971	10410351	-9.08342	0.000275059	0.00296728	0.594254	AA987161	expressed sequence AA987161
972	10475782	-9.08323	0.00027534	0.00296728	0.25718	Dusp2	dual specificity phosphatase 2
973	10545629	9.08312	0.000275622	0.00296728	1.92663	Htra2	HtrA serine peptidase 2
974	10489591	-9.0831	0.000275903	0.00296728	0.595991	Zfp335	zinc finger protein 335
975	10561453	-9.07716	0.000276184	0.00296728	0.300252	Zfp36	zinc finger protein 36
976	10608677	-9.07696	0.000276465	0.00296728	0.652263	Tox4	TOX high mobility group box family member 4
977	10521261	9.07477	0.000276747	0.00296728	1.74068	Htt	huntingtin
978	10341665	9.07421	0.000277028	0.00296728	3.46231	NA	NA
979	10351792	-9.0736	0.000277309	0.00296728	0.165634	Slamf9	SLAM family member 9
980	10391461	9.06719	0.00027759	0.00296728	2.04365	Brca1	breast cancer 1
981	10538526	-9.06688	0.000278153	0.00296985	0.526043	Avl9	AVL9 homolog (S. cerevisiase)
982	10374012	-9.05986	0.000278434	0.00296985	0.678301	Rasl10a	RAS-like, family 10, member A
983	10448459	9.05906	0.000278715	0.00296985	2.39264	Tbc1d24	TBC1 domain family, member 24
984	10557481	-9.05584	0.000278997	0.00296985	0.330699	Ypel3	yippee-like 3 (Drosophila)
985	10486255	9.05383	0.000279278	0.00296985	3.49819	Oip5	Opa interacting protein 5
986	10373569	9.05307	0.000279559	0.00296985	1.39966	NA	NA
987	10343352	9.05129	0.00027984	0.00296985	4.85791	NA	NA
988	10339377	-9.04927	0.000280121	0.00296985	0.654211	NA	NA
989	10586184	9.04918	0.000280403	0.00296985	3.56249	Tipin	timeless interacting protein
990	10361956	-9.04789	0.000280684	0.00296985	0.656385	Map7	microtubule-associated protein 7
991	10503244	9.04527	0.000280965	0.00296985	1.29801	NA	NA
992	10495343	-9.03816	0.000281246	0.00296985	0.362673	Wdr47	WD repeat domain 47
993	10392701	9.03719	0.000281528	0.00296985	2.34688	Slc39a11	solute carrier family 39 (metal ion transporter), member 11
994	10466304	9.03661	0.000281809	0.00296985	3.19385	Dtx4	deltex 4 homolog (Drosophila)
995	10354374	9.0359	0.00028209	0.00296985	8.32841	Slc40a1	solute carrier family 40 (iron-regulated transporter), member 1
996	10559766	-9.03348	0.000282371	0.00296985	0.455621	Zfp583	zinc finger protein 583
997	10341327	-9.03266	0.000282653	0.00296985	0.498476	NA	NA
998	10339623	-9.03188	0.000282934	0.00296985	0.500908	NA	NA
999	10394093	-9.01279	0.000283496	0.00297069	0.57393	BC017643	cDNA sequence BC017643
1000	10506188	9.01207	0.000283778	0.00297069	2.30149	Pgm2	phosphoglucomutase 2
1001	10546217	9.01167	0.000284059	0.00297069	1.67136	Chchd6	coiled-coil-helix-coiled-coil-helix domain containing 6
1002	10444068	-9.00427	0.00028434	0.00297069	0.603058	Tapbp	TAP binding protein
1003	10374560	-9.00354	0.000284621	0.00297069	0.62206	Zrsr1	zinc finger (CCCH type), RNA binding motif and serine/arginine rich 1
1004	10353438	-8.99819	0.000284903	0.00297069	0.429807	Tram2	translocating chain-associating membrane protein 2
1005	10574899	8.99724	0.000285184	0.00297069	2.4859	NA	NA
1006	10410452	8.99597	0.000285465	0.00297069	2.06531	Srd5a1	steroid 5 alpha-reductase 1
1007	10549532	-8.99398	0.000285746	0.00297069	0.135105	NA	NA
1008	10423733	-8.99321	0.000286028	0.00297069	0.683047	NA	NA
1009	10516507	-8.9927	0.000286309	0.00297069	0.428252	Zscan20	zinc finger and SCAN domains 20
1010	10553413	8.99184	0.00028659	0.00297069	1.95363	Prmt3	protein arginine N-methyltransferase 3
1011	10552725	-8.99043	0.000286871	0.00297069	0.599786	Vrk3	vaccinia related kinase 3
1012	10565968	-8.98782	0.000287153	0.00297069	0.432292	Atg16l2	autophagy related 16-like 2 (S. cerevisiae)
1013	10545644	-8.98778	0.000287434	0.00297069	0.663519	Wbp1	WW domain binding protein 1
1014	10556246	-8.9792	0.000287715	0.00297069	0.571972	Zfp143	zinc finger protein 143
1015	10458247	-8.9778	0.000287996	0.00297069	0.571514	Lrrtm2	leucine rich repeat transmembrane neuronal 2
1016	10527133	-8.97448	0.000288278	0.00297069	0.680334	Wipi2	WD repeat domain, phosphoinositide interacting 2
1017	10439204	8.97036	0.000288559	0.00297069	1.3763	NA	NA
1018	10404874	-8.96901	0.00028884	0.00297069	0.187422	Mylip	myosin regulatory light chain interacting protein
1019	10515051	-8.96731	0.000289121	0.00297069	0.555107	Osbpl9	oxysterol binding protein-like 9
1020	10515399	-8.96494	0.000289403	0.00297069	0.439864	Plk3	polo-like kinase 3
1021	10431410	-8.96372	0.000289684	0.00297069	0.266318	Mapk11	mitogen-activated protein kinase 11
1022	10545534	8.96194	0.000289965	0.00297069	1.69878	Rnf26	ring finger protein 26
1023	10420426	8.96007	0.000290246	0.00297069	3.53596	Ska3	spindle and kinetochore associated complex subunit 3
1024	10367746	8.9596	0.000290528	0.00297069	2.36113	Sash1	SAM and SH3 domain containing 1
1025	10543944	-8.95834	0.000290809	0.00297069	0.600286	Mtpn	myotrophin
1026	10476443	8.95694	0.00029109	0.00297069	2.87449	Plcb4	phospholipase C, beta 4
1027	10409076	-8.95575	0.000291653	0.00297069	0.594007	Phf2	PHD finger protein 2
1028	10481931	8.95487	0.000291934	0.00297069	2.23926	Phf19	PHD finger protein 19
1029	10543686	-8.95146	0.000292215	0.00297069	0.426655	Ube2h	ubiquitin-conjugating enzyme E2H
1030	10505791	8.9501	0.000292496	0.00297069	2.49041	Focad	focadhesin
1031	10340934	-8.94846	0.000292778	0.00297069	0.502166	NA	NA
1032	10553555	8.94793	0.000293059	0.00297069	1.23014	NA	NA
1033	10340076	-8.93893	0.00029334	0.00297069	0.493484	NA	NA
1034	10376239	8.93762	0.000293621	0.00297069	1.70318	Gm12238	predicted gene 12238
1035	10507961	-8.93694	0.000293903	0.00297069	0.645014	Mtf1	metal response element binding transcription factor 1
1036	10516209	8.93169	0.000294184	0.00297069	1.22987	Macf1	microtubule-actin crosslinking factor 1
1037	10583044	8.93169	0.000294465	0.00297069	7.06763	Mmp13	matrix metallopeptidase 13
1038	10439092	-8.92676	0.000294746	0.00297069	0.269833	1700021K19Rik	RIKEN cDNA 1700021K19 gene
1039	10343583	8.91453	0.000295028	0.00297069	4.69874	NA	NA
1040	10458419	-8.91224	0.000295309	0.00297069	0.568913	Slc25a2	solute carrier family 25 (mitochondrial carrier, ornithine transporter) member 2
1041	10540075	-8.9101	0.00029559	0.00297069	0.478898	Hdac11	histone deacetylase 11
1042	10487040	8.90796	0.000295871	0.00297069	3.4789	Fbn1	fibrillin 1
1043	10364287	8.90648	0.000296153	0.00297069	1.53892	Sumo3	SMT3 suppressor of mif two 3 homolog 3 (yeast)
1044	10465485	-8.90487	0.000296434	0.00297069	0.691561	Esrra	estrogen related receptor, alpha
1045	10549108	8.90291	0.000296715	0.00297069	3.89211	Abcc9	ATP-binding cassette, sub-family C (CFTR/MRP), member 9
1046	10338885	-8.90148	0.000296996	0.00297069	0.657079	NA	NA
1047	10534059	8.90127	0.000297278	0.00297069	1.26719	NA	NA
1048	10374185	-8.90043	0.000297559	0.00297069	0.39253	Ccm2	cerebral cavernous malformation 2
1049	10341480	-8.89952	0.00029784	0.00297069	0.270868	NA	NA
1050	10555041	8.89908	0.000298121	0.00297069	2.64076	Alg8	asparagine-linked glycosylation 8 (alpha-1,3-glucosyltransferase)
1051	10571876	8.89814	0.000298403	0.00297069	1.29275	NA	NA
1052	10448471	-8.89786	0.000298684	0.00297069	0.636129	Dnase1l2	deoxyribonuclease 1-like 2
1053	10350247	-8.89224	0.000298965	0.00297069	0.465492	Kif21b	kinesin family member 21B
1054	10601421	-8.88132	0.000299246	0.00297069	0.0914525	A630033H20Rik	RIKEN cDNA A630033H20 gene
1055	10593966	-8.88029	0.000299528	0.00297069	0.623835	Csk	c-src tyrosine kinase
1056	10585338	8.87763	0.000299809	0.00297069	1.85997	Kdelc2	KDEL (Lys-Asp-Glu-Leu) containing 2
1057	10401935	8.87571	0.00030009	0.00297069	7.47892	BC005685	cDNA sequence BC005685
1058	10487021	-8.86597	0.000300371	0.00297069	0.172383	Slc30a4	solute carrier family 30 (zinc transporter), member 4
1059	10545308	-8.86166	0.000300652	0.00297069	0.508416	Kdm3a	lysine (K)-specific demethylase 3A
1060	10474769	8.86145	0.000300934	0.00297069	3.23465	Bub1b	budding uninhibited by benzimidazoles 1 homolog, beta (S. cerevisiae)
1061	10339134	8.85736	0.000301215	0.00297069	2.66142	NA	NA
1062	10470905	8.85318	0.000301496	0.00297069	2.81111	Set	SET nuclear oncogene
1063	10374764	8.85233	0.000301777	0.00297069	1.26272	NA	NA
1064	10517373	8.85013	0.000302059	0.00297069	1.78904	NA	NA
1065	10555401	-8.84983	0.00030234	0.00297069	0.360947	Dnajb13	DnaJ (Hsp40) related, subfamily B, member 13
1066	10390352	8.84975	0.000302621	0.00297069	1.88358	Kpnb1	karyopherin (importin) beta 1
1067	10366038	-8.84748	0.000302902	0.00297069	0.59041	Galnt4	UDP-N-acetyl-alpha-D-galactosamine:polypeptide N-acetylgalactosaminyltransferase 4
1068	10436426	-8.84479	0.000303184	0.00297069	0.695342	Orai2	ORAI calcium release-activated calcium modulator 2
1069	10588669	-8.8394	0.000303465	0.00297069	0.538237	Rassf1	Ras association (RalGDS/AF-6) domain family member 1
1070	10365260	8.83723	0.000303746	0.00297069	2.20634	Txnrd1	thioredoxin reductase 1
1071	10534660	8.8368	0.000304027	0.00297069	2.02047	Ap1s1	adaptor protein complex AP-1, sigma 1
1072	10539337	8.83233	0.000304309	0.00297069	1.70165	Mogs	mannosyl-oligosaccharide glucosidase
1073	10425370	-8.82508	0.00030459	0.00297069	0.237976	Cacna1i	calcium channel, voltage-dependent, alpha 1I subunit
1074	10392120	-8.82314	0.000304871	0.00297069	0.665751	Smarcd2	SWI/SNF related, matrix associated, actin dependent regulator of chromatin, subfamily d, member 2
1075	10340461	-8.82215	0.000305152	0.00297069	0.514849	NA	NA
1076	10467578	-8.82197	0.000305434	0.00297069	0.275492	Pik3ap1	phosphoinositide-3-kinase adaptor protein 1
1077	10504730	8.82075	0.000305715	0.00297069	1.9605	Anp32b	acidic (leucine-rich) nuclear phosphoprotein 32 family, member B
1078	10509820	8.81164	0.000305996	0.00297069	1.36684	Rcc2	regulator of chromosome condensation 2
1079	10511501	8.81003	0.000306277	0.00297069	2.09165	Ndufaf6	NADH dehydrogenase (ubiquinone) complex I, assembly factor 6
1080	10403036	-8.79877	0.000306559	0.00297069	0.0660188	NA	NA
1081	10473240	8.79283	0.00030684	0.00297069	1.503	NA	NA
1082	10383032	8.79225	0.000307121	0.00297069	1.23904	Engase	endo-beta-N-acetylglucosaminidase
1083	10340284	-8.7915	0.000307402	0.00297069	0.631705	NA	NA
1084	10570434	8.78997	0.000307684	0.00297069	16.1115	Ifitm1	interferon induced transmembrane protein 1
1085	10561017	-8.78853	0.000307965	0.00297069	0.30742	Pafah1b3	platelet-activating factor acetylhydrolase, isoform 1b, subunit 3
1086	10533483	8.7851	0.000308246	0.00297069	1.64955	Atp2a2	ATPase, Ca++ transporting, cardiac muscle, slow twitch 2
1087	10593628	-8.78042	0.000308527	0.00297069	0.53269	Rab39	RAB39, member RAS oncogene family
1088	10541191	-8.77319	0.000308809	0.00297069	0.521646	Rad52	RAD52 homolog (S. cerevisiae)
1089	10394591	8.77318	0.00030909	0.00297069	1.3588	NA	NA
1090	10345967	8.77296	0.000309371	0.00297069	2.66432	Bivm	basic, immunoglobulin-like variable motif containing
1091	10581271	8.76795	0.000309652	0.00297069	2.28685	Zdhhc1	zinc finger, DHHC domain containing 1
1092	10486154	-8.76627	0.000309934	0.00297069	0.646633	A430105I19Rik	RIKEN cDNA A430105I19 gene
1093	10361995	8.76476	0.000310215	0.00297069	2.48089	Mtfr2	mitochondrial fission regulator 2
1094	10405185	8.75836	0.000310496	0.00297069	2.40531	Cks2	CDC28 protein kinase regulatory subunit 2
1095	10591747	8.75806	0.000310777	0.00297069	1.35381	NA	NA
1096	10553301	8.75735	0.000311059	0.00297069	1.92651	Ldha	lactate dehydrogenase A
1097	10389395	8.75471	0.00031134	0.00297069	2.43665	Brip1	BRCA1 interacting protein C-terminal helicase 1
1098	10492888	8.75198	0.000311621	0.00297069	2.31832	NA	NA
1099	10545001	-8.75067	0.000311902	0.00297069	0.533421	Ppm1k	protein phosphatase 1K (PP2C domain containing)
1100	10367100	8.74923	0.000312184	0.00297069	2.5942	NA	NA
1101	10361110	8.74707	0.000312465	0.00297069	3.37216	Dtl	denticleless homolog (Drosophila)
1102	10446084	-8.74512	0.000312746	0.00297069	0.587718	Kdm4b	lysine (K)-specific demethylase 4B
1103	10487513	8.73903	0.000313027	0.00297069	1.43193	Anapc1	anaphase promoting complex subunit 1
1104	10418766	8.73886	0.000313309	0.00297069	2.68856	Ankrd28	ankyrin repeat domain 28
1105	10384223	8.73779	0.00031359	0.00297069	4.65504	Igfbp3	insulin-like growth factor binding protein 3
1106	10415248	8.73448	0.000314152	0.00297069	2.49569	Pck2	phosphoenolpyruvate carboxykinase 2 (mitochondrial)
1107	10381419	-8.73208	0.000314434	0.00297069	0.551751	Nbr1	neighbor of Brca1 gene 1
1108	10403577	-8.72988	0.000314715	0.00297069	0.499067	NA	NA
1109	10455533	8.72832	0.000314996	0.00297069	1.84946	Eif1a	eukaryotic translation initiation factor 1A
1110	10593589	-8.72794	0.000315277	0.00297069	0.532773	Gm9963	predicted gene 9963
1111	10382542	8.72777	0.000315559	0.00297069	1.65126	Nup85	nucleoporin 85
1112	10413710	8.72766	0.00031584	0.00297069	3.61628	Nt5dc2	5'-nucleotidase domain containing 2
1113	10568228	-8.72561	0.000316121	0.00297069	0.548494	Zfp747	zinc finger protein 747
1114	10532865	-8.7255	0.000316402	0.00297069	0.596293	Git2	G protein-coupled receptor kinase-interactor 2
1115	10531290	-8.72377	0.000316684	0.00297069	0.505967	Rchy1	ring finger and CHY zinc finger domain containing 1
1116	10465963	-8.72191	0.000316965	0.00297069	0.465889	Lrrc10b	leucine rich repeat containing 10B
1117	10393614	-8.72176	0.000317246	0.00297069	0.643734	Cbx8	chromobox 8
1118	10373588	-8.71828	0.000317527	0.00297069	0.69443	NA	NA
1119	10386125	8.7173	0.000317809	0.00297069	2.05191	Gemin5	gem (nuclear organelle) associated protein 5
1120	10491331	-8.7166	0.00031809	0.00297069	0.574834	Pik3ca	phosphatidylinositol 3-kinase, catalytic, alpha polypeptide
1121	10597477	-8.71511	0.000318371	0.00297069	0.254965	Gpd1l	glycerol-3-phosphate dehydrogenase 1-like
1122	10597413	8.71507	0.000318652	0.00297069	2.97754	Crtap	cartilage associated protein
1123	10374364	-8.70903	0.000318934	0.00297069	0.70094	Akt2	thymoma viral proto-oncogene 2
1124	10503695	-8.70816	0.000319215	0.00297069	0.137137	Bach2	BTB and CNC homology 2
1125	10383731	8.70379	0.000319496	0.00297069	2.83598	Smtn	smoothelin
1126	10525419	8.69778	0.000319777	0.00297069	3.4931	P2rx7	purinergic receptor P2X, ligand-gated ion channel, 7
1127	10374020	8.6961	0.000320058	0.00297069	1.97867	Rhbdd3	rhomboid domain containing 3
1128	10371662	8.6956	0.00032034	0.00297069	2.95106	Spic	Spi-C transcription factor (Spi-1/PU.1 related)
1129	10340779	-8.69521	0.000320621	0.00297069	0.575838	NA	NA
1130	10434741	8.69399	0.000320902	0.00297069	2.74552	Eif4a2	eukaryotic translation initiation factor 4A2
1131	10546272	-8.69322	0.000321183	0.00297069	0.423307	Iqsec1	IQ motif and Sec7 domain 1
1132	10532463	8.68874	0.000321465	0.00297069	1.59274	Pus1	pseudouridine synthase 1
1133	10338827	8.68695	0.000321746	0.00297069	3.82721	NA	NA
1134	10498998	-8.68598	0.000322027	0.00297069	0.444223	D930015E06Rik	RIKEN cDNA D930015E06 gene
1135	10600357	-8.6831	0.000322308	0.00297069	0.574837	Taz	tafazzin
1136	10395893	8.68288	0.00032259	0.00297069	1.41995	Gemin2	gem (nuclear organelle) associated protein 2
1137	10477644	-8.68091	0.000322871	0.00297069	0.345691	Trp53inp2	transformation related protein 53 inducible nuclear protein 2
1138	10538100	8.68017	0.000323152	0.00297069	2.85454	Repin1	replication initiator 1
1139	10360934	8.67883	0.000323433	0.00297069	2.05513	Rrp15	ribosomal RNA processing 15 homolog (S. cerevisiae)
1140	10445442	-8.67761	0.000323715	0.00297069	0.535699	Gtpbp2	GTP binding protein 2
1141	10421573	8.67737	0.000323996	0.00297069	1.95714	NA	NA
1142	10515113	8.67679	0.000324558	0.00297069	1.54791	NA	NA
1143	10344741	8.67679	0.000324558	0.00297069	1.54791	NA	NA
1144	10506822	8.67277	0.00032484	0.00297069	2.57334	Orc1	origin recognition complex, subunit 1
1145	10581363	8.66833	0.000325121	0.00297069	1.43466	Cenpt	centromere protein T
1146	10403034	-8.66664	0.000325402	0.00297069	0.130649	NA	NA
1147	10596951	-8.66618	0.000325683	0.00297069	0.541943	Arih2	ariadne homolog 2 (Drosophila)
1148	10418991	-8.66332	0.000325965	0.00297069	0.598168	Ccser2	coiled-coil serine rich 2
1149	10561008	-8.66088	0.000326246	0.00297069	0.464006	Ceacam1	carcinoembryonic antigen-related cell adhesion molecule 1
1150	10538282	8.65479	0.000326527	0.00297069	1.87093	NA	NA
1151	10413018	-8.65305	0.000326808	0.00297069	0.609196	Zswim8	zinc finger SWIM-type containing 8
1152	10509542	8.65002	0.00032709	0.00297069	1.718	Ddost	dolichyl-di-phosphooligosaccharide-protein glycotransferase
1153	10404774	-8.6433	0.000327371	0.00297069	0.374185	Hivep1	human immunodeficiency virus type I enhancer binding protein 1
1154	10580537	-8.64143	0.000327652	0.00297069	0.650709	Aktip	thymoma viral proto-oncogene 1 interacting protein
1155	10498531	-8.6402	0.000327933	0.00297069	0.548124	Ccnl1	cyclin L1
1156	10564290	-8.63663	0.000328215	0.00297069	0.397695	Klf13	Kruppel-like factor 13
1157	10391431	8.63626	0.000328496	0.00297069	1.80119	Aarsd1	alanyl-tRNA synthetase domain containing 1
1158	10606071	8.63488	0.000328777	0.00297069	1.9631	Ercc6l	excision repair cross-complementing rodent repair deficiency complementation group 6 like
1159	10417745	8.63484	0.000329058	0.00297069	1.37311	NA	NA
1160	10483178	-8.63334	0.00032934	0.00297069	0.390623	Cobll1	Cobl-like 1
1161	10602474	-8.632	0.000329621	0.00297069	0.562811	Phf8	PHD finger protein 8
1162	10498405	8.63122	0.000329902	0.00297069	1.31685	NA	NA
1163	10436239	-8.62999	0.000330183	0.00297069	0.650538	NA	NA
1164	10515431	8.62902	0.000330465	0.00297069	4.71873	Kif2c	kinesin family member 2C
1165	10576661	8.62888	0.000330746	0.00297069	2.42758	Itgb1	integrin beta 1 (fibronectin receptor beta)
1166	10342383	-8.62808	0.000331027	0.00297069	0.681024	NA	NA
1167	10443027	-8.62622	0.000331308	0.00297069	0.394531	Crebrf	CREB3 regulatory factor
1168	10409767	8.62543	0.00033159	0.00297069	2.55823	Golm1	golgi membrane protein 1
1169	10450744	-8.62475	0.000331871	0.00297069	0.683094	NA	NA
1170	10343636	8.62232	0.000332152	0.00297069	2.52258	NA	NA
1171	10367728	-8.61992	0.000332433	0.00297069	0.728838	Tab2	TGF-beta activated kinase 1/MAP3K7 binding protein 2
1172	10594248	8.61485	0.000332715	0.00297069	1.41275	NA	NA
1173	10384936	-8.61228	0.000332996	0.00297069	0.65651	Acyp2	acylphosphatase 2, muscle type
1174	10441339	8.61213	0.000333277	0.00297069	1.7721	A630089N07Rik	RIKEN cDNA A630089N07 gene
1175	10516943	8.60949	0.000333558	0.00297069	1.62271	Atpif1	ATPase inhibitory factor 1
1176	10454807	8.60664	0.00033384	0.00297069	2.57615	NA	NA
1177	10461022	8.60067	0.000334121	0.00297069	1.96479	NA	NA
1178	10384652	-8.59303	0.000334402	0.00297069	0.161198	NA	NA
1179	10565570	8.59064	0.000334683	0.00297069	2.7088	Ddias	DNA damage-induced apoptosis suppressor
1180	10480813	8.58316	0.000334965	0.00297069	1.39144	Rabl6	RAB, member RAS oncogene family-like 6
1181	10343581	8.57928	0.000335246	0.00297069	2.26115	NA	NA
1182	10557405	-8.57898	0.000335527	0.00297069	0.607524	Rabep2	rabaptin, RAB GTPase binding effector protein 2
1183	10504757	8.57822	0.000335808	0.00297069	7.49887	BC005685	cDNA sequence BC005685
1184	10344041	8.57579	0.00033609	0.00297069	4.11301	NA	NA
1185	10462130	-8.57353	0.000336371	0.00297069	0.706042	Fam122a	family with sequence similarity 122, member A
1186	10594538	-8.56935	0.000336652	0.00297069	0.518928	Plekho2	pleckstrin homology domain containing, family O member 2
1187	10598381	-8.56918	0.000336933	0.00297069	0.610278	Gpkow	G patch domain and KOW motifs
1188	10368670	8.56196	0.000337215	0.00297069	1.95732	NA	NA
1189	10588722	-8.56051	0.000337496	0.00297069	0.608687	Mon1a	MON1 homolog A (yeast)
1190	10504838	-8.55966	0.000337777	0.00297069	0.691069	Nr4a3	nuclear receptor subfamily 4, group A, member 3
1191	10607832	-8.55592	0.000338058	0.00297069	0.682198	Rab9	RAB9, member RAS oncogene family
1192	10370950	-8.55553	0.00033834	0.00297069	0.59987	Ap3d1	adaptor-related protein complex 3, delta 1 subunit
1193	10421683	8.55552	0.000338621	0.00297069	1.29538	NA	NA
1194	10340710	-8.55229	0.000338902	0.00297069	0.596852	NA	NA
1195	10377593	-8.55099	0.000339183	0.00297069	0.516371	Zbtb4	zinc finger and BTB domain containing 4
1196	10533781	8.54936	0.000339465	0.00297069	1.31729	Mphosph9	M-phase phosphoprotein 9
1197	10424379	-8.54731	0.000339746	0.00297069	0.691198	NA	NA
1198	10535381	-8.54731	0.000340027	0.00297069	0.911447	Actb	actin, beta
1199	10347948	-8.54726	0.000340308	0.00297069	0.276524	Sp100	nuclear antigen Sp100
1200	10338796	8.54458	0.000340589	0.00297069	2.6762	NA	NA
1201	10572485	-8.54278	0.000340871	0.00297069	0.322381	Rab3a	RAB3A, member RAS oncogene family
1202	10421577	-8.54275	0.000341152	0.00297069	0.448668	Gm9779	predicted gene 9779
1203	10413014	8.54046	0.000341433	0.00297069	2.43808	Chchd1	coiled-coil-helix-coiled-coil-helix domain containing 1
1204	10445729	-8.54042	0.000341714	0.00297069	0.362197	Tfeb	transcription factor EB
1205	10502257	8.5311	0.000341996	0.00297069	1.7751	Gstcd	glutathione S-transferase, C-terminal domain containing
1206	10583647	-8.52965	0.000342277	0.00297069	0.635147	Dnm2	dynamin 2
1207	10447510	8.5296	0.000342558	0.00297069	2.02188	2700099C18Rik	NDC80 homolog, kinetochore complex component pseudogene
1208	10418905	8.52911	0.000342839	0.00297069	1.5088	Fam35a	family with sequence similarity 35, member A
1209	10405216	-8.52861	0.000343121	0.00297069	0.339539	Syk	spleen tyrosine kinase
1210	10341325	8.52585	0.000343402	0.00297069	3.69163	NA	NA
1211	10392251	-8.52409	0.000343683	0.00297069	0.694137	NA	NA
1212	10503643	8.52403	0.000343964	0.00297069	2.24117	Ndufaf4	NADH dehydrogenase (ubiquinone) 1 alpha subcomplex, assembly factor 4
1213	10451434	8.52376	0.000344246	0.00297069	1.37223	Ppp2r5d	protein phosphatase 2, regulatory subunit B', delta
1214	10462866	8.52364	0.000344527	0.00297069	3.74117	Cep55	centrosomal protein 55
1215	10499438	8.52268	0.000344808	0.00297069	1.91088	Msto1	misato homolog 1 (Drosophila)
1216	10382888	8.52184	0.000345089	0.00297069	1.79932	NA	NA
1217	10386460	8.52026	0.000345371	0.00297069	1.55463	Pemt	phosphatidylethanolamine N-methyltransferase
1218	10373027	8.51553	0.000345652	0.00297069	3.10944	Tspan31	tetraspanin 31
1219	10339545	8.51534	0.000345933	0.00297069	1.39283	NA	NA
1220	10531919	-8.5151	0.000346214	0.00297069	0.544407	Hsd17b11	hydroxysteroid (17-beta) dehydrogenase 11
1221	10343567	-8.5147	0.000346496	0.00297069	0.286346	NA	NA
1222	10445746	8.51119	0.000346777	0.00297069	11.7128	Trem1	triggering receptor expressed on myeloid cells 1
1223	10474700	8.51001	0.000347058	0.00297069	14.5302	Thbs1	thrombospondin 1
1224	10364239	8.50816	0.000347339	0.00297069	2.77335	Slc19a1	solute carrier family 19 (folate transporter), member 1
1225	10559377	-8.50797	0.000347621	0.00297069	0.688476	NA	NA
1226	10556297	-8.50677	0.000347902	0.00297069	0.555503	Adm	adrenomedullin
1227	10580188	8.50515	0.000348183	0.00297069	2.08176	Nacc1	nucleus accumbens associated 1, BEN and BTB (POZ) domain containing
1228	10340945	8.50487	0.000348464	0.00297069	1.89692	NA	NA
1229	10405174	-8.50399	0.000348746	0.00297069	0.605177	Nxnl2	nucleoredoxin-like 2
1230	10351035	8.50099	0.000349027	0.00297069	4.34389	Gas5	growth arrest specific 5
1231	10480432	8.49779	0.000349308	0.00297069	3.62484	Mastl	microtubule associated serine/threonine kinase-like
1232	10458940	-8.49641	0.000349589	0.00297069	0.438518	Zfp608	zinc finger protein 608
1233	10505998	8.49358	0.000349871	0.00297069	8.21854	Fggy	FGGY carbohydrate kinase domain containing
1234	10581311	-8.48874	0.000350152	0.00297069	0.587741	NA	NA
1235	10476989	8.488	0.000350433	0.00297069	3.06752	Gins1	GINS complex subunit 1 (Psf1 homolog)
1236	10464659	-8.48695	0.000350714	0.00297069	0.489274	Rad9a	RAD9 homolog A
1237	10605674	8.48606	0.000350996	0.00297069	3.41889	Pola1	polymerase (DNA directed), alpha 1
1238	10437222	8.48563	0.000351277	0.00297069	1.51212	NA	NA
1239	10473008	8.47988	0.000351558	0.00297069	1.44595	Hnrnpa3	heterogeneous nuclear ribonucleoprotein A3
1240	10441554	-8.47951	0.000351839	0.00297069	0.700608	NA	NA
1241	10405432	-8.47726	0.000352121	0.00297069	0.564228	Rgs14	regulator of G-protein signaling 14
1242	10591960	8.47432	0.000352402	0.00297069	2.70802	Vps26b	vacuolar protein sorting 26 homolog B (yeast)
1243	10407809	-8.47191	0.000352683	0.00297069	0.782661	NA	NA
1244	10518132	-8.46819	0.000352964	0.00297069	0.450717	Prdm2	PR domain containing 2, with ZNF domain
1245	10351616	-8.46468	0.000353246	0.00297069	0.548663	Usf1	upstream transcription factor 1
1246	10455602	-8.46245	0.000353527	0.00297069	0.442934	Dmxl1	Dmx-like 1
1247	10375485	8.46215	0.000353808	0.00297069	1.97159	Hn1l	hematological and neurological expressed 1-like
1248	10350297	8.46022	0.000354089	0.00297069	2.89417	Kif14	kinesin family member 14
1249	10440794	8.45636	0.000354371	0.00297069	2.00977	Mis18a	MIS18 kinetochore protein homolog A (S. pombe)
1250	10544084	8.45088	0.000354652	0.00297069	3.02207	Zc3hav1l	zinc finger CCCH-type, antiviral 1-like
1251	10594613	-8.45047	0.000354933	0.00297069	0.742621	Usp3	ubiquitin specific peptidase 3
1252	10419711	8.45018	0.000355214	0.00297069	1.69218	Psma3	proteasome (prosome, macropain) subunit, alpha type 3
1253	10346549	8.44974	0.000355496	0.00297069	1.84914	NA	NA
1254	10384737	-8.44671	0.000355777	0.00297069	0.583366	Papolg	poly(A) polymerase gamma
1255	10465980	-8.44452	0.000356058	0.00297069	0.490375	Sdhaf2	succinate dehydrogenase complex assembly factor 2
1256	10449471	8.44139	0.000356339	0.00297069	1.76385	Srpk1	serine/arginine-rich protein specific kinase 1
1257	10512901	8.43988	0.000356621	0.00297069	1.77449	Mrpl50	mitochondrial ribosomal protein L50
1258	10339365	-8.43804	0.000356902	0.00297069	0.490239	NA	NA
1259	10469772	-8.43636	0.000357183	0.00297069	0.884801	NA	NA
1260	10521589	-8.43632	0.000357464	0.00297069	0.720105	NA	NA
1261	10562130	-8.42988	0.000357746	0.00297069	0.233072	Ffar1	free fatty acid receptor 1
1262	10562368	-8.42897	0.000358027	0.00297069	0.625503	4931406P16Rik	RIKEN cDNA 4931406P16 gene
1263	10557519	8.42847	0.000358308	0.00297069	2.1725	Hirip3	HIRA interacting protein 3
1264	10357630	8.42804	0.000358589	0.00297069	2.19101	Srgap2	SLIT-ROBO Rho GTPase activating protein 2
1265	10420437	-8.42711	0.000358871	0.00297069	0.496406	Zdhhc20	zinc finger, DHHC domain containing 20
1266	10428209	8.42378	0.000359152	0.00297069	6.16039	Gm10384	predicted gene 10384
1267	10551162	-8.42361	0.000359433	0.00297069	0.519382	Atp5sl	ATP5S-like
1268	10563659	-8.42043	0.000359714	0.00297069	0.400731	Spty2d1	SPT2, Suppressor of Ty, domain containing 1 (S. cerevisiae)
1269	10594812	-8.42034	0.000359996	0.00297069	0.793328	Lipc	lipase, hepatic
1270	10528143	8.41901	0.000360277	0.00297069	2.01961	Ppp1r14b	protein phosphatase 1, regulatory (inhibitor) subunit 14B
1271	10456439	8.41296	0.000360558	0.00297069	1.75283	Cep192	centrosomal protein 192
1272	10548735	-8.41269	0.000360839	0.00297069	0.498045	Dusp16	dual specificity phosphatase 16
1273	10433472	-8.41158	0.00036112	0.00297069	0.668373	1810013L24Rik	RIKEN cDNA 1810013L24 gene
1274	10342196	8.41071	0.000361402	0.00297069	2.34647	NA	NA
1275	10423180	8.40767	0.000361683	0.00297069	1.28303	NA	NA
1276	10381238	-8.40629	0.000361964	0.00297069	0.570524	Mlx	MAX-like protein X
1277	10454606	8.40622	0.000362245	0.00297069	1.8038	Wdr36	WD repeat domain 36
1278	10397752	-8.40172	0.000362527	0.00297069	0.639527	NA	NA
1279	10562084	8.3993	0.000362808	0.00297069	1.52865	Haus5	HAUS augmin-like complex, subunit 5
1280	10596857	-8.39694	0.000363089	0.00297069	0.722434	Apeh	acylpeptide hydrolase
1281	10608721	-8.39633	0.00036337	0.00297069	0.585921	Sts	steroid sulfatase
1282	10390328	-8.39595	0.000363652	0.00297069	0.542654	Tbx21	T-box 21
1283	10421917	8.39592	0.000363933	0.00297069	1.71117	Pabpc4	poly(A) binding protein, cytoplasmic 4
1284	10459389	8.39129	0.000364214	0.00297069	1.99209	Amd1	S-adenosylmethionine decarboxylase 1
1285	10514368	8.3862	0.000364495	0.00297069	1.29506	NA	NA
1286	10554817	8.38242	0.000364777	0.00297069	1.41912	NA	NA
1287	10457938	8.3765	0.000365058	0.00297069	1.40202	NA	NA
1288	10500837	8.37618	0.000365339	0.00297069	2.45332	Dclre1b	DNA cross-link repair 1B, PSO2 homolog (S. cerevisiae)
1289	10475247	-8.37609	0.00036562	0.00297069	0.565942	Tmem62	transmembrane protein 62
1290	10351304	-8.37409	0.000365902	0.00297069	0.602431	Mpc2	mitochondrial pyruvate carrier 2
1291	10597878	8.37355	0.000366183	0.00297069	1.76903	Pomgnt2	protein O-linked mannose beta 1,4-N-acetylglucosaminyltransferase 2
1292	10354111	-8.36812	0.000366464	0.00297069	0.54481	Aff3	AF4/FMR2 family, member 3
1293	10490370	8.36769	0.000366745	0.00297069	2.08601	Psma7	proteasome (prosome, macropain) subunit, alpha type 7
1294	10355327	8.36629	0.000367027	0.00297069	2.963	Bard1	BRCA1 associated RING domain 1
1295	10470427	8.36529	0.000367308	0.00297069	1.51446	Wdr5	WD repeat domain 5
1296	10507851	8.3632	0.000367589	0.00297069	1.68788	Pabpc4	poly(A) binding protein, cytoplasmic 4
1297	10568897	8.35698	0.00036787	0.00297069	1.42104	Tubgcp2	tubulin, gamma complex associated protein 2
1298	10352448	-8.3514	0.000368152	0.00297069	0.253703	Dusp10	dual specificity phosphatase 10
1299	10389858	8.35079	0.000368433	0.00297069	1.62566	Nme2	NME/NM23 nucleoside diphosphate kinase 2
1300	10506786	-8.34859	0.000368714	0.00297069	0.638428	Zcchc11	zinc finger, CCHC domain containing 11
1301	10482109	-8.34694	0.000368995	0.00297069	0.656735	Rbm18	RNA binding motif protein 18
1302	10341405	-8.34087	0.000369277	0.00297069	0.533201	NA	NA
1303	10450069	-8.34017	0.000369558	0.00297069	0.182793	H2-K2	histocompatibility 2, K region locus 2
1304	10522530	8.33988	0.000369839	0.00297069	3.19287	Kit	kit oncogene
1305	10582477	-8.33782	0.00037012	0.00297069	0.587973	Spata2l	spermatogenesis associated 2-like
1306	10343928	-8.33163	0.000370402	0.00297069	0.571524	NA	NA
1307	10498313	8.32674	0.000370964	0.00297069	2.18171	Pgk1	phosphoglycerate kinase 1
1308	10399379	8.32674	0.000370964	0.00297069	2.18171	Pgk1	phosphoglycerate kinase 1
1309	10539702	8.32482	0.000371245	0.00297069	3.10643	Fam136a	family with sequence similarity 136, member A
1310	10601390	8.3209	0.000371527	0.00297069	2.11707	Pgk1	phosphoglycerate kinase 1
1311	10535852	8.32064	0.000371808	0.00297069	2.44734	Slc7a1	solute carrier family 7 (cationic amino acid transporter, y+ system), member 1
1312	10342416	8.31788	0.000372089	0.00297069	1.47125	NA	NA
1313	10456346	-8.31627	0.00037237	0.00297069	0.625966	Sec11c	SEC11 homolog C (S. cerevisiae)
1314	10507299	-8.31569	0.000372652	0.00297069	0.703269	Gpbp1l1	GC-rich promoter binding protein 1-like 1
1315	10469056	8.30873	0.000372933	0.00297069	1.42841	Gm13194	predicted gene 13194
1316	10538857	8.30857	0.000373214	0.00297069	1.43043	Serbp1	serpine1 mRNA binding protein 1
1317	10385391	-8.3068	0.000373495	0.00297069	0.537539	Cyfip2	cytoplasmic FMR1 interacting protein 2
1318	10340389	8.30116	0.000373777	0.00297069	1.35886	NA	NA
1319	10460831	-8.30096	0.000374058	0.00297069	0.829361	Mir192	microRNA 192
1320	10519007	-8.30041	0.000374339	0.00297069	0.49232	Tprgl	transformation related protein 63 regulated like
1321	10477090	-8.30032	0.00037462	0.00297069	0.665151	Tbc1d20	TBC1 domain family, member 20
1322	10389421	8.29846	0.000374902	0.00297069	1.90812	Ints2	integrator complex subunit 2
1323	10528484	8.29683	0.000375183	0.00297069	2.00975	Srpk2	serine/arginine-rich protein specific kinase 2
1324	10373101	-8.29681	0.000375464	0.00297069	0.577332	Pip4k2c	phosphatidylinositol-5-phosphate 4-kinase, type II, gamma
1325	10425781	8.2962	0.000375745	0.00297069	1.57143	Serhl	serine hydrolase-like
1326	10338443	8.29435	0.000376308	0.0029718	3.03014	NA	NA
1327	10348299	-8.29429	0.000376589	0.0029718	0.334706	5830472F04Rik	RIKEN cDNA 5830472F04 gene
1328	10434942	-8.29074	0.00037687	0.0029718	0.617913	Dlg1	discs, large homolog 1 (Drosophila)
1329	10379989	8.28647	0.000377152	0.0029718	2.29317	Ska2	spindle and kinetochore associated complex subunit 2
1330	10529252	-8.28519	0.000377433	0.0029718	0.678758	Prr14l	proline rich 14-like
1331	10343924	8.28389	0.000377714	0.0029718	2.34722	NA	NA
1332	10453461	-8.28339	0.000377995	0.0029718	0.590923	Fbxo11	F-box protein 11
1333	10344329	-8.28171	0.000378277	0.0029718	0.447213	NA	NA
1334	10579181	-8.27759	0.000378558	0.0029718	0.473962	Rfxank	regulatory factor X-associated ankyrin-containing protein
1335	10403063	-8.27758	0.000378839	0.0029718	0.123487	NA	NA
1336	10397736	-8.27752	0.00037912	0.0029718	0.671325	Kcnk13	potassium channel, subfamily K, member 13
1337	10558439	8.2744	0.000379402	0.0029718	2.19843	Phgdh	3-phosphoglycerate dehydrogenase
1338	10601567	8.2727	0.000379683	0.0029718	1.33682	NA	NA
1339	10409200	8.27142	0.000379964	0.0029718	1.36264	NA	NA
1340	10431393	-8.26937	0.000380245	0.0029718	0.538669	Mapk12	mitogen-activated protein kinase 12
1341	10404152	-8.26911	0.000380526	0.0029718	0.521439	Fam65b	family with sequence similarity 65, member B
1342	10503431	8.26892	0.000380808	0.0029718	2.04917	Nbn	nibrin
1343	10512935	8.26819	0.000381089	0.0029718	1.95226	NA	NA
1344	10564857	8.26733	0.00038137	0.0029718	1.37272	NA	NA
1345	10523134	8.26536	0.000381651	0.0029718	11.3658	Pf4	platelet factor 4
1346	10368748	8.26516	0.000381933	0.0029718	1.90027	NA	NA
1347	10416187	8.26257	0.000382214	0.0029718	1.25695	Stc1	stanniocalcin 1
1348	10497971	8.25898	0.000382495	0.0029718	1.98136	Sclt1	sodium channel and clathrin linker 1
1349	10440600	8.25655	0.000382776	0.0029718	1.99387	Cct8	chaperonin containing Tcp1, subunit 8 (theta)
1350	10338344	8.25634	0.000383058	0.0029718	1.76937	NA	NA
1351	10607694	-8.25605	0.000383339	0.0029718	0.570398	Syap1	synapse associated protein 1
1352	10525983	8.25469	0.00038362	0.0029718	2.19697	Ran	RAN, member RAS oncogene family
1353	10389894	8.25343	0.000383901	0.0029718	1.96521	Abcc3	ATP-binding cassette, sub-family C (CFTR/MRP), member 3
1354	10606248	-8.25207	0.000384183	0.0029718	0.561672	Magee2	melanoma antigen, family E, 2
1355	10545751	8.25038	0.000384464	0.0029718	1.259	Tex261	testis expressed gene 261
1356	10575662	-8.2495	0.000384745	0.0029718	0.669357	NA	NA
1357	10465226	-8.24815	0.000385026	0.0029718	0.771156	Scyl1	SCY1-like 1 (S. cerevisiae)
1358	10590801	-8.24413	0.000385308	0.0029718	0.316395	Birc3	baculoviral IAP repeat-containing 3
1359	10517513	8.24404	0.000385589	0.0029718	7.84627	C1qc	complement component 1, q subcomponent, C chain
1360	10374590	8.24108	0.00038587	0.0029718	1.81427	Xpo1	exportin 1, CRM1 homolog (yeast)
1361	10476102	8.23727	0.000386151	0.0029718	1.43746	Nop56	NOP56 ribonucleoprotein
1362	10461078	8.23671	0.000386433	0.0029718	1.61898	Atl3	atlastin GTPase 3
1363	10529875	8.23606	0.000386714	0.0029718	3.07455	Ldb2	LIM domain binding 2
1364	10472782	8.23593	0.000386995	0.0029718	1.9307	Hat1	histone aminotransferase 1
1365	10561702	8.23207	0.000387276	0.0029718	3.0061	Kcnk6	potassium inwardly-rectifying channel, subfamily K, member 6
1366	10547638	8.23123	0.000387558	0.0029718	1.36833	NA	NA
1367	10480258	-8.2298	0.000387839	0.0029718	0.62942	Nsun6	NOL1/NOP2/Sun domain family member 6
1368	10367544	-8.22619	0.00038812	0.0029718	0.656526	Ctdsp2	CTD (carboxy-terminal domain, RNA polymerase II, polypeptide A) small phosphatase 2
1369	10539435	8.22335	0.000388401	0.0029718	1.7382	Bola3	bolA-like 3 (E. coli)
1370	10502787	8.22291	0.000388683	0.0029718	1.51201	NA	NA
1371	10473160	-8.22251	0.000388964	0.0029718	0.501957	Ssfa2	sperm specific antigen 2
1372	10547976	-8.22143	0.000389245	0.0029718	0.533052	Tapbpl	TAP binding protein-like
1373	10465571	-8.21763	0.000389526	0.0029718	0.60861	Dnajc4	DnaJ (Hsp40) homolog, subfamily C, member 4
1374	10557285	8.21609	0.000389808	0.0029718	1.49614	Lcmt1	leucine carboxyl methyltransferase 1
1375	10590494	8.21468	0.000390089	0.0029718	3.74861	Kif15	kinesin family member 15
1376	10448424	-8.21445	0.00039037	0.0029718	0.718322	Pdpk1	3-phosphoinositide dependent protein kinase 1
1377	10474875	8.21329	0.000390651	0.0029718	3.36618	Casc5	cancer susceptibility candidate 5
1378	10574427	8.21325	0.000390933	0.0029718	5.40351	NA	NA
1379	10342967	-8.21224	0.000391214	0.0029718	0.654154	NA	NA
1380	10547227	-8.20653	0.000391495	0.0029718	0.381053	Ret	ret proto-oncogene
1381	10407327	8.20521	0.000391776	0.0029718	6.00246	Emb	embigin
1382	10393431	8.20409	0.000392058	0.0029718	4.26424	Tk1	thymidine kinase 1
1383	10504957	8.20281	0.000392339	0.0029718	2.50479	Smc2	structural maintenance of chromosomes 2
1384	10538832	8.19535	0.000392901	0.00297217	2.20732	Mad2l1	MAD2 mitotic arrest deficient-like 1
1385	10568328	8.1953	0.000393183	0.00297217	2.85759	Vkorc1	vitamin K epoxide reductase complex, subunit 1
1386	10575775	-8.19518	0.000393464	0.00297217	0.666668	Cmip	c-Maf inducing protein
1387	10547936	8.19414	0.000393745	0.00297217	1.26937	NA	NA
1388	10395252	-8.19345	0.000394026	0.00297217	0.504997	Ccdc71l	coiled-coil domain containing 71 like
1389	10346564	8.19092	0.000394308	0.00297217	1.25775	Casp8	caspase 8
1390	10342631	8.19038	0.000394589	0.00297217	2.8747	NA	NA
1391	10342490	8.19019	0.00039487	0.00297217	2.46221	NA	NA
1392	10385043	8.18413	0.000395151	0.00297217	2.31444	Npm1	nucleophosmin 1
1393	10462846	-8.18357	0.000395433	0.00297217	0.645279	Cyp26c1	cytochrome P450, family 26, subfamily c, polypeptide 1
1394	10510422	-8.18301	0.000395714	0.00297217	0.439287	Casz1	castor zinc finger 1
1395	10556169	-8.18086	0.000395995	0.00297217	0.729979	Eif3f	eukaryotic translation initiation factor 3, subunit F
1396	10513181	8.17734	0.000396276	0.00297217	1.28744	NA	NA
1397	10351043	8.17312	0.000396558	0.00297217	4.17324	Snord47	small nucleolar RNA, C/D box 47
1398	10481621	-8.17123	0.000396839	0.00297217	0.434175	1110008P14Rik	RIKEN cDNA 1110008P14 gene
1399	10445574	8.17064	0.00039712	0.00297217	2.26753	Cul7	cullin 7
1400	10508376	-8.16638	0.000397401	0.00297217	0.735844	Trim62	tripartite motif-containing 62
1401	10526459	8.16018	0.000397683	0.00297217	1.74051	Rasa4	RAS p21 protein activator 4
1402	10493120	8.15595	0.000397964	0.00297217	1.86775	Gpatch4	G patch domain containing 4
1403	10474902	8.15534	0.000398245	0.00297217	2.76628	Rad51	RAD51 homolog
1404	10470446	8.155	0.000398526	0.00297217	1.71312	Rxra	retinoid X receptor alpha
1405	10338169	-8.154	0.000398808	0.00297217	0.175349	NA	NA
1406	10451395	-8.15337	0.000399089	0.00297217	0.666909	Klc4	kinesin light chain 4
1407	10401713	8.15332	0.00039937	0.00297217	1.63181	Pomt2	protein-O-mannosyltransferase 2
1408	10352092	-8.15327	0.000399651	0.00297217	0.460731	Zbtb18	zinc finger and BTB domain containing 18
1409	10384622	-8.15311	0.000399933	0.00297217	0.741546	Ehbp1	EH domain binding protein 1
1410	10491805	8.15075	0.000400214	0.00297217	1.90671	Plk4	polo-like kinase 4
1411	10475890	8.15037	0.000400495	0.00297217	4.66648	Mertk	c-mer proto-oncogene tyrosine kinase
1412	10608698	-8.14996	0.000400776	0.00297217	0.479264	Zfp429	zinc finger protein 429
1413	10515590	-8.14956	0.000401057	0.00297217	0.630638	Kdm4a	lysine (K)-specific demethylase 4A
1414	10484463	8.14926	0.000401339	0.00297217	12.7313	Serping1	serine (or cysteine) peptidase inhibitor, clade G, member 1
1415	10340488	-8.14837	0.00040162	0.00297217	0.599347	NA	NA
1416	10534253	8.14435	0.000401901	0.00297217	2.82037	Gtf2ird1	general transcription factor II I repeat domain-containing 1
1417	10545436	-8.14254	0.000402182	0.00297217	0.591744	Elmod3	ELMO/CED-12 domain containing 3
1418	10540897	8.14079	0.000402464	0.00297217	2.64056	Pparg	peroxisome proliferator activated receptor gamma
1419	10555235	8.13983	0.000402745	0.00297217	1.56306	Arrb1	arrestin, beta 1
1420	10465895	8.13777	0.000403026	0.00297217	6.23769	Fads2	fatty acid desaturase 2
1421	10554281	8.13583	0.000403307	0.00297217	1.97087	Fanci	Fanconi anemia, complementation group I
1422	10474541	8.13345	0.000403589	0.00297217	1.94674	Nop10	NOP10 ribonucleoprotein
1423	10495781	-8.13265	0.00040387	0.00297217	0.137411	Bcar3	breast cancer anti-estrogen resistance 3
1424	10463064	8.12936	0.000404151	0.00297217	1.37575	NA	NA
1425	10561247	-8.12626	0.000404432	0.00297217	0.68992	Shkbp1	Sh3kbp1 binding protein 1
1426	10360003	8.12523	0.000404714	0.00297217	1.96752	Dusp12	dual specificity phosphatase 12
1427	10505931	8.12248	0.000404995	0.00297217	1.56118	Ift74	intraflagellar transport 74
1428	10513008	-8.12026	0.000405276	0.00297217	0.381764	Klf4	Kruppel-like factor 4 (gut)
1429	10385248	8.11954	0.000405557	0.00297217	3.94841	Hmmr	hyaluronan mediated motility receptor (RHAMM)
1430	10524973	-8.1184	0.000405839	0.00297217	0.689727	2410131K14Rik	RIKEN cDNA 2410131K14 gene
1431	10539727	-8.11752	0.00040612	0.00297217	0.586125	C87436	expressed sequence C87436
1432	10339064	8.11716	0.000406401	0.00297217	1.40171	NA	NA
1433	10381072	8.11538	0.000406682	0.00297217	1.89888	Cdc6	cell division cycle 6
1434	10456414	8.11382	0.000406964	0.00297217	1.92998	Psmg2	proteasome (prosome, macropain) assembly chaperone 2
1435	10583676	8.1132	0.000407245	0.00297217	1.63848	Carm1	coactivator-associated arginine methyltransferase 1
1436	10344053	-8.11079	0.000407526	0.00297217	0.643539	NA	NA
1437	10382848	-8.11009	0.000407807	0.00297217	0.687471	Mettl23	methyltransferase like 23
1438	10523206	-8.10514	0.000408089	0.00297217	0.573151	Uso1	USO1 vesicle docking factor
1439	10459705	-8.10422	0.00040837	0.00297217	0.652778	Smad4	SMAD family member 4
1440	10591715	-8.10371	0.000408651	0.00297217	0.582727	Zfp653	zinc finger protein 653
1441	10535653	-8.10288	0.000408932	0.00297217	0.545376	Zkscan14	zinc finger with KRAB and SCAN domains 14
1442	10505092	8.10239	0.000409214	0.00297217	1.65001	Rad23b	RAD23b homolog (S. cerevisiae)
1443	10483679	-8.10088	0.000409495	0.00297217	0.15608	Gpr155	G protein-coupled receptor 155
1444	10343902	8.09929	0.000409776	0.00297217	2.23061	NA	NA
1445	10550451	8.09928	0.000410057	0.00297217	1.42618	NA	NA
1446	10552743	-8.09923	0.000410339	0.00297217	0.249312	NA	NA
1447	10364650	-8.0985	0.00041062	0.00297217	0.594443	Hmha1	histocompatibility (minor) HA-1
1448	10528200	8.09743	0.000410901	0.00297217	1.48942	NA	NA
1449	10600235	-8.09671	0.000411182	0.00297217	0.618776	Abcd1	ATP-binding cassette, sub-family D (ALD), member 1
1450	10407211	8.09671	0.000411464	0.00297217	3.08757	NA	NA
1451	10523518	8.09025	0.000411745	0.00297217	1.56477	Enoph1	enolase-phosphatase 1
1452	10397853	-8.08934	0.000412026	0.00297217	0.549249	Rin3	Ras and Rab interactor 3
1453	10606178	-8.08901	0.000412307	0.00297217	0.0171268	Xist	inactive X specific transcripts
1454	10545229	-8.08599	0.000412589	0.00297217	0.61203	NA	NA
1455	10429407	-8.0804	0.00041287	0.00297217	0.622369	NA	NA
1456	10575777	-8.07833	0.000413151	0.00297217	0.687159	Cmip	c-Maf inducing protein
1457	10449775	8.07817	0.000413432	0.00297217	2.17976	Notch3	notch 3
1458	10346576	-8.07304	0.000413714	0.00297217	0.549851	Stradb	STE20-related kinase adaptor beta
1459	10339353	-8.07007	0.000413995	0.00297217	0.247241	NA	NA
1460	10344493	8.06573	0.000414276	0.00297217	1.91193	NA	NA
1461	10533929	8.06388	0.000414557	0.00297217	2.49174	Scarb1	scavenger receptor class B, member 1
1462	10542079	8.06254	0.000414839	0.00297217	2.33532	NA	NA
1463	10445531	-8.05781	0.00041512	0.00297217	0.281238	Zfp318	zinc finger protein 318
1464	10496475	8.05665	0.000415401	0.00297217	1.80926	Adh5	alcohol dehydrogenase 5 (class III), chi polypeptide
1465	10489589	-8.05339	0.000415682	0.00297217	0.599037	4930445K14Rik	RIKEN cDNA 4930445K14 gene
1466	10572605	8.05001	0.000415964	0.00297217	1.60569	Ankle1	ankyrin repeat and LEM domain containing 1
1467	10592201	8.04785	0.000416245	0.00297217	3.73345	Chek1	checkpoint kinase 1
1468	10395922	8.04376	0.000416526	0.00297217	1.29703	NA	NA
1469	10471154	8.04284	0.000416807	0.00297217	4.43281	NA	NA
1470	10495173	-8.04152	0.000417089	0.00297217	0.685357	Lrif1	ligand dependent nuclear receptor interacting factor 1
1471	10430255	8.04105	0.00041737	0.00297217	2.12318	Foxred2	FAD-dependent oxidoreductase domain containing 2
1472	10590060	8.04105	0.000417651	0.00297217	2.04119	Ctdspl	CTD (carboxy-terminal domain, RNA polymerase II, polypeptide A) small phosphatase-like
1473	10413502	-8.03908	0.000417932	0.00297217	0.736206	Actr8	ARP8 actin-related protein 8
1474	10360544	8.03572	0.000418214	0.00297217	1.1751	Hnrnpu	heterogeneous nuclear ribonucleoprotein U
1475	10574456	-8.03422	0.000418495	0.00297217	0.660518	Cklf	chemokine-like factor
1476	10355730	-8.03418	0.000418776	0.00297217	0.707135	NA	NA
1477	10581940	8.03115	0.000419057	0.00297217	1.73479	Kars	lysyl-tRNA synthetase
1478	10412741	-8.02998	0.00041962	0.0029738	0.534342	Atxn7	ataxin 7
1479	10507671	-8.02852	0.000419901	0.0029738	0.631157	Guca2a	guanylate cyclase activator 2a (guanylin)
1480	10342267	-8.02841	0.000420182	0.0029738	0.425882	NA	NA
1481	10528482	-8.02676	0.000420463	0.0029738	0.551611	5031425E22Rik	RIKEN cDNA 5031425E22 gene
1482	10409557	8.02284	0.000420745	0.0029738	1.73565	H2afy	H2A histone family, member Y
1483	10342873	8.0207	0.000421026	0.0029738	6.97062	NA	NA
1484	10565924	8.01995	0.000421307	0.0029738	2.76212	Relt	RELT tumor necrosis factor receptor
1485	10343057	8.0178	0.000421588	0.0029738	3.9599	NA	NA
1486	10453512	8.01751	0.00042187	0.0029738	2.52799	NA	NA
1487	10532954	8.01687	0.000422151	0.0029738	2.94151	Mlec	malectin
1488	10522248	-8.01679	0.000422432	0.0029738	0.698302	NA	NA
1489	10438103	8.01229	0.000422995	0.0029738	2.41302	Ccdc116	coiled-coil domain containing 116
1490	10497520	8.0097	0.000423276	0.0029738	2.984	Ect2	ect2 oncogene
1491	10439936	-8.00943	0.000423557	0.0029738	0.524226	Nfkbiz	nuclear factor of kappa light polypeptide gene enhancer in B cells inhibitor, zeta
1492	10349922	-8.00648	0.000423838	0.0029738	0.559881	NA	NA
1493	10435305	8.00369	0.00042412	0.0029738	2.51677	Itgb5	integrin beta 5
1494	10474950	-8.00279	0.000424401	0.0029738	0.518579	Vps18	vacuolar protein sorting 18 (yeast)
1495	10561178	-8.00167	0.000424682	0.0029738	0.592656	Rab4b	RAB4B, member RAS oncogene family
1496	10377547	-7.99909	0.000424963	0.0029738	0.764853	1700064E03Rik	uncharacterized LOC74273
1497	10460631	-7.99859	0.000425245	0.0029738	0.609951	Rela	v-rel reticuloendotheliosis viral oncogene homolog A (avian)
1498	10338074	-7.99795	0.000425526	0.0029738	0.572373	NA	NA
1499	10595626	7.99238	0.000425807	0.0029738	2.92797	9430037G07Rik	RIKEN cDNA 9430037G07 gene
1500	10509161	7.99187	0.000426088	0.0029738	1.56577	NA	NA
1501	10481210	-7.99066	0.00042637	0.0029738	0.535157	Vav2	vav 2 oncogene
1502	10582074	7.9896	0.000426651	0.0029738	1.87385	Mphosph6	M phase phosphoprotein 6
1503	10338797	7.98942	0.000426932	0.0029738	4.09378	NA	NA
1504	10495416	7.98615	0.000427213	0.0029738	2.51142	Vav3	vav 3 oncogene
1505	10475113	-7.98558	0.000427495	0.0029738	0.569672	NA	NA
1506	10353250	7.98425	0.000427776	0.0029738	1.23133	Gapdh	glyceraldehyde-3-phosphate dehydrogenase
1507	10378053	7.98364	0.000428057	0.0029738	3.13399	Fam64a	family with sequence similarity 64, member A
1508	10368612	7.97616	0.000428338	0.0029738	1.33812	NA	NA
1509	10341261	-7.97338	0.00042862	0.0029738	0.637424	NA	NA
1510	10474112	-7.9726	0.000428901	0.0029738	0.485958	Traf6	TNF receptor-associated factor 6
1511	10481508	-7.97179	0.000429182	0.0029738	0.695168	Asb6	ankyrin repeat and SOCS box-containing 6
1512	10586844	-7.97045	0.000429463	0.0029738	0.533395	Adam10	a disintegrin and metallopeptidase domain 10
1513	10400649	7.97008	0.000429745	0.0029738	3.50147	Pole2	polymerase (DNA directed), epsilon 2 (p59 subunit)
1514	10363541	7.96906	0.000430026	0.0029738	4.50009	NA	NA
1515	10554574	7.96847	0.000430307	0.0029738	1.86125	Tm6sf1	transmembrane 6 superfamily member 1
1516	10447699	7.96343	0.000430588	0.0029738	1.27842	NA	NA
1517	10554118	-7.96307	0.00043087	0.0029738	0.118837	Fam169b	family with sequence similarity 169, member B
1518	10557831	-7.96306	0.000431151	0.0029738	0.583946	Kat8	K(lysine) acetyltransferase 8
1519	10346874	7.96094	0.000431432	0.0029738	1.66317	NA	NA
1520	10582719	-7.95991	0.000431713	0.0029738	0.40563	Sipa1l2	signal-induced proliferation-associated 1 like 2
1521	10338315	-7.95868	0.000431995	0.0029738	0.560542	NA	NA
1522	10382243	-7.95707	0.000432276	0.0029738	0.696167	Gna13	guanine nucleotide binding protein, alpha 13
1523	10550931	-7.95508	0.000432557	0.0029738	0.422318	Irgq	immunity-related GTPase family, Q
1524	10390640	-7.95502	0.000432838	0.0029738	0.0486316	Ikzf3	IKAROS family zinc finger 3
1525	10338854	7.95472	0.00043312	0.0029738	3.01827	NA	NA
1526	10428576	7.95193	0.000433401	0.0029738	1.37314	NA	NA
1527	10515423	7.94944	0.000433682	0.0029738	2.67857	NA	NA
1528	10475965	7.94913	0.000433963	0.0029738	2.1722	Polr1b	polymerase (RNA) I polypeptide B
1529	10340152	7.94878	0.000434245	0.0029738	2.67783	NA	NA
1530	10424810	7.94769	0.000434526	0.0029738	1.79047	Gpaa1	GPI anchor attachment protein 1
1531	10555055	7.94649	0.000434807	0.0029738	1.90626	Ndufc2	NADH dehydrogenase (ubiquinone) 1, subcomplex unknown, 2
1532	10437963	7.94638	0.000435088	0.0029738	1.59872	Mzt2	mitotic spindle organizing protein 2
1533	10512470	-7.94466	0.00043537	0.0029738	0.0304342	Cd72	CD72 antigen
1534	10534142	-7.94142	0.000435651	0.0029738	0.707601	Sbds	Shwachman-Bodian-Diamond syndrome homolog (human)
1535	10365899	7.93972	0.000435932	0.0029738	1.8294	Cep83	centrosomal protein 83
1536	10605392	7.93446	0.000436213	0.0029738	2.55444	F8	coagulation factor VIII
1537	10396652	-7.93302	0.000436495	0.0029738	0.356647	Hspa2	heat shock protein 2
1538	10398717	7.93115	0.000436776	0.0029738	2.41474	Trmt61a	tRNA methyltransferase 61A
1539	10540122	7.93049	0.000437057	0.0029738	1.74782	Slc6a6	solute carrier family 6 (neurotransmitter transporter, taurine), member 6
1540	10344137	7.92624	0.000437338	0.0029738	1.74839	NA	NA
1541	10605554	7.92531	0.000437901	0.0029738	1.28594	NA	NA
1542	10553516	7.92531	0.000437901	0.0029738	1.28594	NA	NA
1543	10342375	-7.92484	0.000438182	0.0029738	0.646493	NA	NA
1544	10460237	-7.90772	0.000438463	0.0029738	0.513805	Unc93b1	unc-93 homolog B1 (C. elegans)
1545	10425461	7.90698	0.000438745	0.0029738	2.14146	Adsl	adenylosuccinate lyase
1546	10340632	-7.90441	0.000439026	0.0029738	0.540864	NA	NA
1547	10338888	-7.90373	0.000439307	0.0029738	0.621577	NA	NA
1548	10501397	-7.90185	0.000439588	0.0029738	0.661903	Tmem167b	transmembrane protein 167B
1549	10366337	7.89841	0.00043987	0.0029738	1.35804	Nap1l1	nucleosome assembly protein 1-like 1
1550	10540795	-7.89718	0.000440151	0.0029738	0.219316	Irak2	interleukin-1 receptor-associated kinase 2
1551	10463224	7.89543	0.000440432	0.0029738	3.25585	Marveld1	MARVEL (membrane-associating) domain containing 1
1552	10343502	-7.89435	0.000440713	0.0029738	0.609066	NA	NA
1553	10368806	-7.89283	0.000440994	0.0029738	0.564483	Smpd2	sphingomyelin phosphodiesterase 2, neutral
1554	10341164	-7.89221	0.000441276	0.0029738	0.481732	NA	NA
1555	10408490	-7.89086	0.000441557	0.0029738	0.700124	Exoc2	exocyst complex component 2
1556	10435525	-7.89046	0.000441838	0.0029738	0.404601	Iqcb1	IQ calmodulin-binding motif containing 1
1557	10569017	7.88935	0.000442119	0.0029738	15.6245	Ifitm3	interferon induced transmembrane protein 3
1558	10348004	7.88888	0.000442401	0.0029738	1.56524	Psmd1	proteasome (prosome, macropain) 26S subunit, non-ATPase, 1
1559	10461614	7.8873	0.000442682	0.0029738	4.83041	Ms4a6c	membrane-spanning 4-domains, subfamily A, member 6C
1560	10472794	7.88021	0.000442963	0.0029738	1.79164	Metap1d	methionyl aminopeptidase type 1D (mitochondrial)
1561	10554549	-7.87896	0.000443244	0.0029738	0.6827	Whamm	WAS protein homolog associated with actin, golgi membranes and microtubules
1562	10514668	-7.87798	0.000443526	0.0029738	0.685098	Jak1	Janus kinase 1
1563	10542650	7.87476	0.000443807	0.0029738	1.73448	Golt1b	golgi transport 1 homolog B (S. cerevisiae)
1564	10496159	-7.87058	0.000444088	0.0029738	0.575149	Ints12	integrator complex subunit 12
1565	10433219	-7.87045	0.000444369	0.0029738	0.616786	Naa60	N(alpha)-acetyltransferase 60, NatF catalytic subunit
1566	10606876	7.86969	0.000444651	0.0029738	2.03711	NA	NA
1567	10482880	-7.86824	0.000444932	0.0029738	0.595419	Baz2b	bromodomain adjacent to zinc finger domain, 2B
1568	10489239	7.86786	0.000445213	0.0029738	2.18481	9430008C03Rik	RIKEN cDNA 9430008C03 gene
1569	10488982	-7.86646	0.000445494	0.0029738	0.712447	NA	NA
1570	10541098	7.86596	0.000445776	0.0029738	1.78859	Zfp239	zinc finger protein 239
1571	10481827	7.86436	0.000446057	0.0029738	1.86566	Zbtb34	zinc finger and BTB domain containing 34
1572	10529817	7.8638	0.000446338	0.0029738	1.33796	NA	NA
1573	10347521	-7.86312	0.000446619	0.0029738	0.759022	Zfand2b	zinc finger, AN1 type domain 2B
1574	10530892	7.86244	0.000446901	0.0029738	1.54099	Cenpc1	centromere protein C1
1575	10437136	-7.86144	0.000447182	0.0029738	0.62864	Dyrk1a	dual-specificity tyrosine-(Y)-phosphorylation regulated kinase 1a
1576	10422655	7.86033	0.000447463	0.0029738	1.30122	NA	NA
1577	10386368	-7.86009	0.000447744	0.0029738	0.498309	2310033P09Rik	RIKEN cDNA 2310033P09 gene
1578	10562125	-7.85758	0.000448026	0.0029738	0.698135	Ffar3	free fatty acid receptor 3
1579	10581813	7.85658	0.000448307	0.0029738	2.94991	Mlkl	mixed lineage kinase domain-like
1580	10533386	-7.8561	0.000448588	0.0029738	0.499584	Sh2b3	SH2B adaptor protein 3
1581	10339225	7.85567	0.000448869	0.0029738	1.4756	NA	NA
1582	10405280	7.85564	0.000449151	0.0029738	1.96004	Arl10	ADP-ribosylation factor-like 10
1583	10342067	7.85354	0.000449432	0.0029738	1.67482	NA	NA
1584	10384566	-7.85296	0.000449713	0.0029738	0.543568	NA	NA
1585	10490826	-7.85156	0.000449994	0.0029738	0.298032	Zbtb10	zinc finger and BTB domain containing 10
1586	10361139	-7.84786	0.000450276	0.0029738	0.220345	Traf5	TNF receptor-associated factor 5
1587	10380289	7.84736	0.000450557	0.0029738	2.2265	Mmd	monocyte to macrophage differentiation-associated
1588	10382300	-7.84374	0.000450838	0.0029738	0.458715	Map2k6	mitogen-activated protein kinase kinase 6
1589	10569265	-7.84171	0.000451119	0.0029738	0.655515	Tollip	toll interacting protein
1590	10458285	7.84155	0.000451401	0.0029738	1.88448	Spata24	spermatogenesis associated 24
1591	10378893	7.84114	0.000451682	0.0029738	2.35806	Abhd15	abhydrolase domain containing 15
1592	10341967	-7.83776	0.000451963	0.0029738	0.589846	NA	NA
1593	10554693	-7.83764	0.000452244	0.0029738	0.588087	Stard5	StAR-related lipid transfer (START) domain containing 5
1594	10520211	7.83745	0.000452526	0.0029738	1.56056	Agap3	ArfGAP with GTPase domain, ankyrin repeat and PH domain 3
1595	10376060	-7.83696	0.000452807	0.0029738	0.397348	Irf1	interferon regulatory factor 1
1596	10549842	-7.83528	0.000453088	0.0029738	0.495713	Zfp667	zinc finger protein 667
1597	10391378	-7.83507	0.000453369	0.0029738	0.572543	Ezh1	enhancer of zeste homolog 1 (Drosophila)
1598	10372102	7.83235	0.000453651	0.0029738	1.32021	NA	NA
1599	10350102	7.83007	0.000453932	0.0029738	2.00343	Ptpn7	protein tyrosine phosphatase, non-receptor type 7
1600	10587988	-7.82988	0.000454213	0.0029738	0.447287	Gk5	glycerol kinase 5 (putative)
1601	10382345	-7.82933	0.000454494	0.0029738	0.565218	Cog1	component of oligomeric golgi complex 1
1602	10340683	7.82784	0.000454776	0.0029738	2.77629	NA	NA
1603	10465861	7.82732	0.000455057	0.0029738	2.56419	Incenp	inner centromere protein
1604	10568461	7.82266	0.000455619	0.00297517	1.69292	Rfwd3	ring finger and WD repeat domain 3
1605	10543031	7.82241	0.000455901	0.00297517	3.25888	Slc25a13	solute carrier family 25 (mitochondrial carrier, adenine nucleotide translocator), member 13
1606	10342314	7.8216	0.000456182	0.00297517	1.71629	NA	NA
1607	10455780	7.82053	0.000456463	0.00297517	1.28915	Csnk1g3	casein kinase 1, gamma 3
1608	10568939	7.82051	0.000456744	0.00297517	1.57865	Echs1	enoyl Coenzyme A hydratase, short chain, 1, mitochondrial
1609	10471191	7.81976	0.000457026	0.00297517	1.83664	Exosc2	exosome component 2
1610	10600485	7.81891	0.000457307	0.00297517	1.96006	Dkc1	dyskeratosis congenita 1, dyskerin
1611	10598164	-7.81781	0.000457588	0.00297517	0.585105	Brox	BRO1 domain and CAAX motif containing
1612	10338346	-7.81187	0.000457869	0.00297517	0.228304	NA	NA
1613	10534190	7.81122	0.000458151	0.00297517	1.28788	Wbscr16	Williams-Beuren syndrome chromosome region 16 homolog (human)
1614	10343823	-7.81115	0.000458432	0.00297517	0.612379	NA	NA
1615	10468022	-7.80912	0.000458713	0.00297517	0.617225	Mrpl43	mitochondrial ribosomal protein L43
1616	10581800	7.8065	0.000459276	0.00297517	1.69595	Rfwd3	ring finger and WD repeat domain 3
1617	10339163	7.80584	0.000459557	0.00297517	2.39301	NA	NA
1618	10559343	-7.80397	0.000459838	0.00297517	0.680794	Shank2	SH3/ankyrin domain gene 2
1619	10422944	-7.80301	0.000460119	0.00297517	0.583442	AW557046	expressed sequence AW557046
1620	10410656	-7.80246	0.0004604	0.00297517	0.62908	Cast	calpastatin
1621	10341224	7.80008	0.000460682	0.00297517	2.61833	NA	NA
1622	10494200	-7.7999	0.000460963	0.00297517	0.623282	Cdc42se1	CDC42 small effector 1
1623	10357808	7.79888	0.000461244	0.00297517	2.22884	Snrpe	small nuclear ribonucleoprotein E
1624	10540118	7.79817	0.000461525	0.00297517	2.09966	Lsm3	LSM3 homolog, U6 small nuclear RNA associated (S. cerevisiae)
1625	10339209	7.79788	0.000461807	0.00297517	1.96287	NA	NA
1626	10504703	7.79618	0.000462088	0.00297517	1.5077	NA	NA
1627	10367337	-7.79609	0.000462369	0.00297517	0.644986	Rnf41	ring finger protein 41
1628	10388520	7.79509	0.00046265	0.00297517	2.11394	Glod4	glyoxalase domain containing 4
1629	10517383	-7.79501	0.000462932	0.00297517	0.638166	Nipal3	NIPA-like domain containing 3
1630	10508036	-7.79389	0.000463213	0.00297517	0.70314	Snip1	Smad nuclear interacting protein 1
1631	10582376	7.79302	0.000463494	0.00297517	2.28073	Piezo1	piezo-type mechanosensitive ion channel component 1
1632	10379127	7.79264	0.000463775	0.00297517	3.22771	Spag5	sperm associated antigen 5
1633	10338709	-7.7907	0.000464057	0.00297517	0.577851	NA	NA
1634	10485645	7.78987	0.000464338	0.00297517	2.01786	Rcn1	reticulocalbin 1
1635	10368511	7.78709	0.000464619	0.00297517	2.26903	Trmt11	tRNA methyltransferase 11
1636	10359890	7.78572	0.0004649	0.00297517	3.22215	Nuf2	NUF2, NDC80 kinetochore complex component, homolog (S. cerevisiae)
1637	10560575	-7.78362	0.000465182	0.00297517	0.447461	Relb	avian reticuloendotheliosis viral (v-rel) oncogene related B
1638	10500103	-7.78274	0.000465463	0.00297517	0.598971	Gabpb2	GA repeat binding protein, beta 2
1639	10412038	-7.78066	0.000465744	0.00297517	0.295122	Zswim6	zinc finger SWIM-type containing 6
1640	10397346	-7.77962	0.000466025	0.00297517	0.20997	Fos	FBJ osteosarcoma oncogene
1641	10586416	7.77955	0.000466307	0.00297517	2.07489	Pif1	PIF1 5'-to-3' DNA helicase homolog (S. cerevisiae)
1642	10384493	7.77823	0.000466588	0.00297517	1.27684	NA	NA
1643	10549552	7.77791	0.000466869	0.00297517	1.74002	Prpf31	PRP31 pre-mRNA processing factor 31 homolog (yeast)
1644	10379389	7.77597	0.00046715	0.00297517	2.99606	Adap2	ArfGAP with dual PH domains 2
1645	10530692	7.77502	0.000467432	0.00297517	2.75378	Kdr	kinase insert domain protein receptor
1646	10528077	7.77397	0.000467713	0.00297517	2.35137	Dbf4	DBF4 homolog (S. cerevisiae)
1647	10411452	7.77392	0.000467994	0.00297517	1.23806	NA	NA
1648	10581289	-7.77232	0.000468275	0.00297517	0.60087	Atp6v0d1	ATPase, H+ transporting, lysosomal V0 subunit D1
1649	10420860	7.77206	0.000468557	0.00297517	1.32991	Elp3	elongator acetyltransferase complex subunit 3
1650	10437695	-7.77168	0.000468838	0.00297517	0.224454	NA	NA
1651	10484425	7.77156	0.000469119	0.00297517	2.14703	2700094K13Rik	RIKEN cDNA 2700094K13 gene
1652	10560181	-7.77124	0.0004694	0.00297517	0.609208	Gltscr2	glioma tumor suppressor candidate region gene 2
1653	10586174	7.76969	0.000469682	0.00297517	2.2439	NA	NA
1654	10482432	7.76914	0.000469963	0.00297517	1.42225	NA	NA
1655	10541522	7.76672	0.000470244	0.00297517	1.24385	NA	NA
1656	10584435	7.76639	0.000470525	0.00297517	2.87622	Vwa5a	von Willebrand factor A domain containing 5A
1657	10347873	-7.76606	0.000470807	0.00297517	0.739943	Agfg1	ArfGAP with FG repeats 1
1658	10341487	-7.76479	0.000471088	0.00297517	0.609515	NA	NA
1659	10587508	7.76411	0.000471369	0.00297517	3.29621	Ttk	Ttk protein kinase
1660	10577792	-7.76311	0.00047165	0.00297517	0.296168	Plekha2	pleckstrin homology domain-containing, family A (phosphoinositide binding specific) member 2
1661	10343293	7.75889	0.000471932	0.00297517	1.46615	NA	NA
1662	10392284	7.75088	0.000472213	0.00297517	2.46246	Kpna2	karyopherin (importin) alpha 2
1663	10453830	7.75077	0.000472494	0.00297517	2.10429	Mib1	mindbomb homolog 1 (Drosophila)
1664	10458251	7.74805	0.000472775	0.00297517	1.42651	Sil1	endoplasmic reticulum chaperone SIL1 homolog (S. cerevisiae)
1665	10343668	-7.74486	0.000473057	0.00297517	0.62521	NA	NA
1666	10565935	7.74006	0.000473338	0.00297517	1.98242	Arhgef17	Rho guanine nucleotide exchange factor (GEF) 17
1667	10339388	-7.73741	0.000473619	0.00297517	0.587151	NA	NA
1668	10342349	-7.73366	0.0004739	0.00297517	0.497467	NA	NA
1669	10471535	7.73035	0.000474182	0.00297517	2.42786	Fam129b	family with sequence similarity 129, member B
1670	10339562	7.72922	0.000474463	0.00297517	3.3298	NA	NA
1671	10353004	7.72886	0.000474744	0.00297517	2.202	NA	NA
1672	10407126	-7.72857	0.000475025	0.00297517	0.229567	Plk2	polo-like kinase 2
1673	10600688	-7.72429	0.000475307	0.00297517	0.656445	Tab3	TGF-beta activated kinase 1/MAP3K7 binding protein 3
1674	10575598	7.72276	0.000475588	0.00297517	2.32498	Znrf1	zinc and ring finger 1
1675	10361897	7.71896	0.000475869	0.00297517	2.06961	Ifngr1	interferon gamma receptor 1
1676	10537157	-7.71814	0.00047615	0.00297517	0.527787	Akr1b10	aldo-keto reductase family 1, member B10 (aldose reductase)
1677	10369774	-7.7155	0.000476432	0.00297517	0.69176	Nrbf2	nuclear receptor binding factor 2
1678	10415176	7.71509	0.000476713	0.00297517	1.59054	Dhrs4	dehydrogenase/reductase (SDR family) member 4
1679	10584325	7.71225	0.000476994	0.00297517	1.30975	Vsig2	V-set and immunoglobulin domain containing 2
1680	10338708	7.71057	0.000477275	0.00297517	1.82749	NA	NA
1681	10412624	-7.71046	0.000477557	0.00297517	0.460596	Pxk	PX domain containing serine/threonine kinase
1682	10443221	7.70985	0.000477838	0.00297517	1.63843	Uhrf1bp1	UHRF1 (ICBP90) binding protein 1
1683	10442087	7.70678	0.000478119	0.00297517	1.1537	Spaca6	sperm acrosome associated 6
1684	10379891	-7.70619	0.0004784	0.00297517	0.558537	Ppm1d	protein phosphatase 1D magnesium-dependent, delta isoform
1685	10515257	7.70558	0.000478682	0.00297517	2.59494	Rad54l	RAD54 like (S. cerevisiae)
1686	10568586	-7.70456	0.000478963	0.00297517	0.314997	Fam53b	family with sequence similarity 53, member B
1687	10342415	-7.70398	0.000479244	0.00297517	0.527561	NA	NA
1688	10402073	7.70095	0.000479525	0.00297517	1.96097	Efcab11	EF-hand calcium binding domain 11
1689	10477187	7.70062	0.000479807	0.00297517	3.19201	Tpx2	TPX2, microtubule-associated protein homolog (Xenopus laevis)
1690	10561806	7.69667	0.000480088	0.00297517	2.03078	NA	NA
1691	10514892	-7.69506	0.000480369	0.00297517	0.662143	Tceanc2	transcription elongation factor A (SII) N-terminal and central domain containing 2
1692	10340370	7.69447	0.00048065	0.00297517	1.68889	NA	NA
1693	10414431	7.69271	0.000480931	0.00297517	1.52834	NA	NA
1694	10370544	-7.69192	0.000481213	0.00297517	0.434156	NA	NA
1695	10370497	7.69111	0.000481494	0.00297517	2.05511	Pdxk	pyridoxal (pyridoxine, vitamin B6) kinase
1696	10389606	7.6897	0.000481775	0.00297517	3.74422	Prr11	proline rich 11
1697	10349442	-7.68772	0.000482056	0.00297517	0.687585	Ccnt2	cyclin T2
1698	10417617	7.68663	0.000482338	0.00297517	1.17592	NA	NA
1699	10548086	7.68524	0.000482619	0.00297517	3.36785	Rad51ap1	RAD51 associated protein 1
1700	10364051	7.68474	0.0004829	0.00297517	1.58191	Snrpd3	small nuclear ribonucleoprotein D3
1701	10546661	-7.6845	0.000483181	0.00297517	0.483534	Foxp1	forkhead box P1
1702	10578222	7.68437	0.000483463	0.00297517	1.84551	Dlc1	deleted in liver cancer 1
1703	10603026	-7.68353	0.000483744	0.00297517	0.590014	Ctps2	cytidine 5'-triphosphate synthase 2
1704	10541507	-7.68062	0.000484025	0.00297517	0.526708	Aicda	activation-induced cytidine deaminase
1705	10493086	7.67833	0.000484306	0.00297517	2.15976	Hdgf	hepatoma-derived growth factor
1706	10438909	7.67719	0.000484588	0.00297517	3.39992	Atp13a3	ATPase type 13A3
1707	10561956	7.67701	0.000484869	0.00297517	1.73729	NA	NA
1708	10519815	-7.67509	0.00048515	0.00297517	0.253685	Cacna2d1	calcium channel, voltage-dependent, alpha2/delta subunit 1
1709	10341596	7.67347	0.000485431	0.00297517	1.57778	NA	NA
1710	10476775	7.67232	0.000485713	0.00297517	1.92388	Naa20	N(alpha)-acetyltransferase 20, NatB catalytic subunit
1711	10520483	7.67231	0.000485994	0.00297517	1.96291	Ept1	ethanolaminephosphotransferase 1 (CDP-ethanolamine-specific)
1712	10576797	-7.67159	0.000486275	0.00297517	0.743143	NA	NA
1713	10413559	7.67153	0.000486556	0.00297517	1.50889	Rft1	RFT1 homolog (S. cerevisiae)
1714	10433735	7.67031	0.000486838	0.00297517	2.88173	Abcc1	ATP-binding cassette, sub-family C (CFTR/MRP), member 1
1715	10582584	7.66994	0.0004874	0.00297517	2.04516	NA	NA
1716	10582582	7.66994	0.0004874	0.00297517	2.04516	NA	NA
1717	10342763	7.66938	0.000487681	0.00297517	1.26143	NA	NA
1718	10401023	7.66829	0.000487963	0.00297517	1.57458	NA	NA
1719	10362941	-7.66146	0.000488244	0.00297517	0.444436	Prep	prolyl endopeptidase
1720	10536390	-7.66005	0.000488525	0.00297517	0.285517	NA	NA
1721	10503259	-7.65964	0.000488806	0.00297517	0.331843	Trp53inp1	transformation related protein 53 inducible nuclear protein 1
1722	10339518	-7.65899	0.000489088	0.00297517	0.483906	NA	NA
1723	10497503	7.65694	0.000489369	0.00297517	2.75805	NA	NA
1724	10579769	7.65534	0.00048965	0.00297517	1.17851	Gapdh	glyceraldehyde-3-phosphate dehydrogenase
1725	10498526	-7.65377	0.000489931	0.00297517	0.483279	4931440P22Rik	RIKEN cDNA 4931440P22 gene
1726	10577866	7.65344	0.000490213	0.00297517	1.48582	Ash2l	ash2 (absent, small, or homeotic)-like (Drosophila)
1727	10358339	7.65106	0.000490494	0.00297517	3.88566	Cfh	complement component factor h
1728	10338148	7.6507	0.000490775	0.00297517	3.35251	NA	NA
1729	10341078	-7.64936	0.000491056	0.00297517	0.678051	NA	NA
1730	10388669	7.64433	0.000491338	0.00297517	1.24997	Trp53i13	transformation related protein 53 inducible protein 13
1731	10356780	7.64268	0.000491619	0.00297517	2.01107	Pask	PAS domain containing serine/threonine kinase
1732	10558001	-7.63945	0.000492181	0.00297584	0.493983	Inpp5f	inositol polyphosphate-5-phosphatase F
1733	10584954	-7.63592	0.000492463	0.00297584	0.662553	NA	NA
1734	10382625	-7.63583	0.000492744	0.00297584	0.585288	Llgl2	lethal giant larvae homolog 2 (Drosophila)
1735	10463557	-7.63453	0.000493025	0.00297584	0.704037	Gbf1	golgi-specific brefeldin A-resistance factor 1
1736	10367305	7.63367	0.000493306	0.00297584	1.72645	Ankrd52	ankyrin repeat domain 52
1737	10510720	7.63225	0.000493588	0.00297584	1.71151	Rpl22	ribosomal protein L22
1738	10434441	7.6317	0.000493869	0.00297584	2.35332	Ece2	endothelin converting enzyme 2
1739	10516640	7.6314	0.00049415	0.00297584	1.61224	Eif3i	eukaryotic translation initiation factor 3, subunit I
1740	10340613	7.63125	0.000494431	0.00297584	4.17581	NA	NA
1741	10464445	7.63083	0.000494713	0.00297584	2.06003	NA	NA
1742	10438376	7.62735	0.000494994	0.00297584	1.26594	38596	septin 5
1743	10499847	-7.62577	0.000495275	0.00297584	0.725892	Chtop	chromatin target of PRMT1
1744	10607089	-7.62551	0.000495556	0.00297584	0.499895	Acsl4	acyl-CoA synthetase long-chain family member 4
1745	10344952	-7.62477	0.000495838	0.00297584	0.689896	Rdh10	retinol dehydrogenase 10 (all-trans)
1746	10384154	-7.62296	0.000496119	0.00297584	0.557011	Myo1g	myosin IG
1747	10551542	7.62244	0.0004964	0.00297584	1.44527	Fbxo17	F-box protein 17
1748	10500630	7.62238	0.000496681	0.00297584	1.75937	Ttf2	transcription termination factor, RNA polymerase II
1749	10579874	7.62187	0.000496963	0.00297584	1.47977	Abce1	ATP-binding cassette, sub-family E (OABP), member 1
1750	10572906	7.62164	0.000497244	0.00297584	1.98371	Mcm5	minichromosome maintenance deficient 5, cell division cycle 46 (S. cerevisiae)
1751	10378848	7.61913	0.000497525	0.00297584	1.52357	Hsp90aa1	heat shock protein 90, alpha (cytosolic), class A member 1
1752	10490104	7.61908	0.000497806	0.00297584	2.7904	Aurka	aurora kinase A
1753	10380821	7.61766	0.000498088	0.00297584	1.93761	NA	NA
1754	10450704	-7.61634	0.000498369	0.00297584	0.836451	NA	NA
1755	10488231	7.61616	0.00049865	0.00297584	1.25327	Rrbp1	ribosome binding protein 1
1756	10511888	-7.61375	0.000498931	0.00297584	0.654307	NA	NA
1757	10608699	7.61219	0.000499213	0.00297584	2.34035	Noc2l	nucleolar complex associated 2 homolog (S. cerevisiae)
1758	10346074	7.61197	0.000499494	0.00297584	1.90603	Wdr75	WD repeat domain 75
1759	10588479	-7.61151	0.000499775	0.00297584	0.354907	Tlr9	toll-like receptor 9
1760	10339311	-7.60932	0.000500056	0.00297584	0.473574	NA	NA
1761	10594320	7.6093	0.000500337	0.00297584	1.23438	Gm10653	ribsomal protein S2 pseudogene
1762	10370021	7.60574	0.000500619	0.00297584	2.00199	Mif	macrophage migration inhibitory factor
1763	10456723	-7.60544	0.0005009	0.00297584	0.616003	BC031181	cDNA sequence BC031181
1764	10342599	-7.60416	0.000501181	0.00297584	0.283329	NA	NA
1765	10535389	-7.60353	0.000501462	0.00297584	0.686379	Rnf216	ring finger protein 216
1766	10512011	-7.60338	0.000501744	0.00297584	0.625121	Zfp292	zinc finger protein 292
1767	10490815	7.60297	0.000502025	0.00297584	2.53894	NA	NA
1768	10515943	7.60294	0.000502306	0.00297584	2.51966	Ctps	cytidine 5'-triphosphate synthase
1769	10543783	7.60208	0.000502587	0.00297584	1.5961	Psma3	proteasome (prosome, macropain) subunit, alpha type 3
1770	10406598	-7.59933	0.000502869	0.00297584	0.136076	Serinc5	serine incorporator 5
1771	10353117	-7.59706	0.00050315	0.00297584	0.560038	Slco5a1	solute carrier organic anion transporter family, member 5A1
1772	10383708	-7.59237	0.000503431	0.00297584	0.644898	Rnf185	ring finger protein 185
1773	10565067	-7.59176	0.000503712	0.00297584	0.58943	NA	NA
1774	10555695	7.59072	0.000503994	0.00297584	2.15991	Rrm1	ribonucleotide reductase M1
1775	10341561	7.58948	0.000504275	0.00297584	1.79986	NA	NA
1776	10450682	-7.58675	0.000504556	0.00297584	0.63666	NA	NA
1777	10508759	7.58461	0.000504837	0.00297584	1.70172	Rpa2	replication protein A2
1778	10446763	-7.58228	0.000505119	0.00297584	0.52332	Lbh	limb-bud and heart
1779	10572932	7.58075	0.0005054	0.00297584	1.93854	Naa20	N(alpha)-acetyltransferase 20, NatB catalytic subunit
1780	10489107	-7.57689	0.000505681	0.00297584	0.44274	Samhd1	SAM domain and HD domain, 1
1781	10342189	-7.57117	0.000505962	0.00297584	0.594932	NA	NA
1782	10470973	7.57114	0.000506244	0.00297584	1.7116	NA	NA
1783	10457745	-7.56965	0.000506525	0.00297584	0.627034	Trappc8	trafficking protein particle complex 8
1784	10452415	7.56838	0.000506806	0.00297584	1.22389	NA	NA
1785	10465185	-7.56785	0.000507087	0.00297584	0.578719	Ehbp1l1	EH domain binding protein 1-like 1
1786	10342357	7.56761	0.000507369	0.00297584	2.12008	NA	NA
1787	10492381	7.5675	0.00050765	0.00297584	1.5549	Gmps	guanine monophosphate synthetase
1788	10461305	-7.56596	0.000507931	0.00297584	0.640283	B3gat3	beta-1,3-glucuronyltransferase 3 (glucuronosyltransferase I)
1789	10533603	-7.56558	0.000508212	0.00297584	0.321977	Rhof	ras homolog gene family, member f
1790	10494238	-7.56426	0.000508494	0.00297584	0.745319	Arnt	aryl hydrocarbon receptor nuclear translocator
1791	10339822	-7.56071	0.000508775	0.00297584	0.58448	NA	NA
1792	10512129	-7.55828	0.000509337	0.00297746	0.677019	B4galt1	UDP-Gal:betaGlcNAc beta 1,4- galactosyltransferase, polypeptide 1
1793	10400748	-7.55785	0.000509619	0.00297746	0.399493	Cdkl1	cyclin-dependent kinase-like 1 (CDC2-related kinase)
1794	10386947	7.55741	0.000510181	0.00297874	1.46078	Zfp286	zinc finger protein 286
1795	10427997	-7.5555	0.000510462	0.00297874	0.341186	Ankrd33b	ankyrin repeat domain 33B
1796	10538878	-7.55545	0.000510744	0.00297874	0.225861	NA	NA
1797	10452085	-7.55347	0.000511025	0.00297874	0.585078	Safb2	scaffold attachment factor B2
1798	10450126	-7.55223	0.000511306	0.00297874	0.731749	Brd2	bromodomain containing 2
1799	10462539	-7.55203	0.000511587	0.00297874	0.429556	Nudt15	nudix (nucleoside diphosphate linked moiety X)-type motif 15
1800	10339553	-7.54972	0.000511869	0.00297874	0.29708	NA	NA
1801	10595604	7.54904	0.00051215	0.00297874	1.71793	Syncrip	synaptotagmin binding, cytoplasmic RNA interacting protein
1802	10499560	7.54789	0.000512431	0.00297874	1.83744	Adam15	a disintegrin and metallopeptidase domain 15 (metargidin)
1803	10408531	7.54766	0.000512712	0.00297874	2.78492	Gmds	GDP-mannose 4, 6-dehydratase
1804	10402615	7.54713	0.000512994	0.00297874	1.49244	Hsp90aa1	heat shock protein 90, alpha (cytosolic), class A member 1
1805	10562639	7.54609	0.000513275	0.00297874	1.33642	NA	NA
1806	10340867	-7.54449	0.000513556	0.00297874	0.594832	NA	NA
1807	10444936	-7.544	0.000513837	0.00297874	0.719341	Dhx16	DEAH (Asp-Glu-Ala-His) box polypeptide 16
1808	10449111	7.54347	0.000514119	0.00297874	1.93237	Wdr90	WD repeat domain 90
1809	10585778	7.54134	0.0005144	0.00297874	4.3904	Sema7a	sema domain, immunoglobulin domain (Ig), and GPI membrane anchor, (semaphorin) 7A
1810	10595620	7.54034	0.000514962	0.00297874	3.0272	NA	NA
1811	10587688	7.54034	0.000514962	0.00297874	3.0272	9430037G07Rik	RIKEN cDNA 9430037G07 gene
1812	10355742	7.53984	0.000515244	0.00297874	2.05205	Abcb6	ATP-binding cassette, sub-family B (MDR/TAP), member 6
1813	10419323	7.53978	0.000515525	0.00297874	2.28403	Dlgap5	discs, large (Drosophila) homolog-associated protein 5
1814	10554863	-7.53674	0.000516087	0.00298023	0.719746	Sytl2	synaptotagmin-like 2
1815	10495012	7.53654	0.000516369	0.00298023	1.32039	Phtf1	putative homeodomain transcription factor 1
1816	10580033	-7.53652	0.00051665	0.00298023	0.272639	Cd97	CD97 antigen
1817	10354157	-7.53651	0.000516931	0.00298023	0.555908	Chst10	carbohydrate sulfotransferase 10
1818	10450025	-7.5359	0.000517212	0.00298023	0.63984	NA	NA
1819	10420097	-7.53543	0.000517494	0.00298023	0.477008	Tinf2	Terf1 (TRF1)-interacting nuclear factor 2
1820	10351039	7.534	0.000517775	0.00298023	4.9409	Gas5	growth arrest specific 5
1821	10385599	7.53245	0.000518337	0.00298075	1.35677	Canx	calnexin
1822	10398085	7.53135	0.000518619	0.00298075	1.55774	Glrx5	glutaredoxin 5 homolog (S. cerevisiae)
1823	10424370	-7.52781	0.0005189	0.00298075	0.338837	Trib1	tribbles homolog 1 (Drosophila)
1824	10393804	-7.52736	0.000519181	0.00298075	0.827214	Arl16	ADP-ribosylation factor-like 16
1825	10444046	7.52645	0.000519462	0.00298075	1.56049	Cd320	CD320 antigen
1826	10339000	7.52622	0.000519744	0.00298075	2.09266	NA	NA
1827	10340114	-7.52495	0.000520025	0.00298075	0.185024	NA	NA
1828	10391963	-7.52475	0.000520306	0.00298075	0.591229	Nsf	N-ethylmaleimide sensitive fusion protein
1829	10545417	7.52191	0.000520587	0.00298075	1.30602	Mat2a	methionine adenosyltransferase II, alpha
1830	10408629	-7.52096	0.00052115	0.00298075	0.203967	Pxdc1	PX domain containing 1
1831	10339185	7.51987	0.000521431	0.00298075	1.89942	NA	NA
1832	10504849	-7.51733	0.000521712	0.00298075	0.672515	Stx17	syntaxin 17
1833	10516894	7.51642	0.000521993	0.00298075	2.13022	Rcc1	regulator of chromosome condensation 1
1834	10435565	-7.51466	0.000522275	0.00298075	0.697403	Hcls1	hematopoietic cell specific Lyn substrate 1
1835	10400124	7.51396	0.000522556	0.00298075	2.31068	NA	NA
1836	10340409	-7.51305	0.000522837	0.00298075	0.690804	NA	NA
1837	10390227	-7.51295	0.000523118	0.00298075	0.743446	Ube2z	ubiquitin-conjugating enzyme E2Z (putative)
1838	10343612	-7.51271	0.0005234	0.00298075	0.680699	NA	NA
1839	10590253	7.51122	0.000523681	0.00298075	1.57163	NA	NA
1840	10440911	-7.51082	0.000523962	0.00298075	0.674526	NA	NA
1841	10367120	7.51072	0.000524243	0.00298075	1.71506	Mir677	microRNA 677
1842	10376230	7.50309	0.000524525	0.00298075	1.83948	G3bp1	GTPase activating protein (SH3 domain) binding protein 1
1843	10407081	7.50184	0.000524806	0.00298075	3.15621	Depdc1b	DEP domain containing 1B
1844	10525296	-7.49945	0.000525087	0.00298075	0.766881	Brap	BRCA1 associated protein
1845	10600504	7.49838	0.000525368	0.00298075	2.00196	Fundc2	FUN14 domain containing 2
1846	10342790	7.49684	0.00052565	0.00298075	2.56804	NA	NA
1847	10509514	7.49424	0.000525931	0.00298075	2.70878	Sh2d5	SH2 domain containing 5
1848	10517486	7.49392	0.000526212	0.00298075	1.40717	NA	NA
1849	10521759	7.4935	0.000526493	0.00298075	1.30646	Slit2	slit homolog 2 (Drosophila)
1850	10408882	-7.49293	0.000526775	0.00298075	0.738408	Ranbp9	RAN binding protein 9
1851	10508368	-7.49279	0.000527056	0.00298075	0.550276	A3galt2	alpha 1,3-galactosyltransferase 2 (isoglobotriaosylceramide synthase)
1852	10387791	7.49277	0.000527337	0.00298075	1.66942	Slc16a13	solute carrier family 16 (monocarboxylic acid transporters), member 13
1853	10575326	-7.49264	0.000527618	0.00298075	0.662164	NA	NA
1854	10456071	7.49225	0.0005279	0.00298075	4.19378	Csf1r	colony stimulating factor 1 receptor
1855	10343201	-7.49152	0.000528181	0.00298075	0.405379	NA	NA
1856	10489127	7.48988	0.000528462	0.00298075	1.8055	Rbl1	retinoblastoma-like 1 (p107)
1857	10418475	7.48712	0.000528743	0.00298075	1.6688	Spcs1	signal peptidase complex subunit 1 homolog (S. cerevisiae)
1858	10352125	-7.48697	0.000529025	0.00298075	0.495323	Gm9982	predicted gene 9982
1859	10343451	-7.48653	0.000529306	0.00298075	0.474524	NA	NA
1860	10452639	-7.48642	0.000529587	0.00298075	0.69027	Myl12b	myosin, light chain 12B, regulatory
1861	10343993	-7.48547	0.000529868	0.00298075	0.389954	NA	NA
1862	10390685	-7.48435	0.00053015	0.00298075	0.635184	NA	NA
1863	10466423	7.48389	0.000530431	0.00298075	1.45785	Cep78	centrosomal protein 78
1864	10584975	-7.48257	0.000530712	0.00298075	0.754161	A830035O19Rik	RIKEN cDNA A830035O19 gene
1865	10426435	7.48248	0.000530993	0.00298075	1.26977	Pdzrn4	PDZ domain containing RING finger 4
1866	10535034	-7.48205	0.000531275	0.00298075	0.685068	Zfp68	zinc finger protein 68
1867	10496919	-7.48033	0.000531556	0.00298075	0.615418	Usp33	ubiquitin specific peptidase 33
1868	10446693	7.47935	0.000531837	0.00298075	1.80904	Wdr43	WD repeat domain 43
1869	10354470	7.47703	0.000532118	0.00298075	1.33525	NA	NA
1870	10534085	-7.476	0.0005324	0.00298075	0.902439	Phkg1	phosphorylase kinase gamma 1
1871	10513957	7.47598	0.000532681	0.00298075	2.35427	Ptprd	protein tyrosine phosphatase, receptor type, D
1872	10493711	-7.4755	0.000532962	0.00298075	0.553087	Crtc2	CREB regulated transcription coactivator 2
1873	10578545	7.47429	0.000533243	0.00298075	1.34201	NA	NA
1874	10590972	7.47242	0.000533525	0.00298075	1.91478	NA	NA
1875	10401109	-7.47011	0.000533806	0.00298075	0.644893	Gpx2	glutathione peroxidase 2
1876	10489904	-7.46919	0.000534087	0.00298075	0.630352	Spata2	spermatogenesis associated 2
1877	10525365	-7.46732	0.000534368	0.00298075	0.180556	Hvcn1	hydrogen voltage-gated channel 1
1878	10396919	-7.46687	0.00053465	0.00298075	0.635442	4933426M11Rik	RIKEN cDNA 4933426M11 gene
1879	10393395	7.46517	0.000534931	0.00298075	1.23708	Srsf2	serine/arginine-rich splicing factor 2
1880	10433049	7.46459	0.000535212	0.00298075	1.61397	Atp5g2	ATP synthase, H+ transporting, mitochondrial F0 complex, subunit C2 (subunit 9)
1881	10393917	7.46347	0.000535493	0.00298075	1.5334	Stra13	stimulated by retinoic acid 13
1882	10439130	7.46321	0.000535775	0.00298075	2.52371	Umps	uridine monophosphate synthetase
1883	10341240	7.46286	0.000536056	0.00298075	1.68086	NA	NA
1884	10367515	7.46242	0.000536337	0.00298075	1.14956	NA	NA
1885	10344495	-7.46112	0.000536618	0.00298075	0.679858	NA	NA
1886	10608676	7.46033	0.0005369	0.00298075	2.01345	L2hgdh	L-2-hydroxyglutarate dehydrogenase
1887	10440414	-7.45943	0.000537181	0.00298075	0.662597	Fau	Finkel-Biskis-Reilly murine sarcoma virus (FBR-MuSV) ubiquitously expressed (fox derived)
1888	10368144	-7.45872	0.000537462	0.00298075	0.263255	Tnfaip3	tumor necrosis factor, alpha-induced protein 3
1889	10339730	-7.45422	0.000537743	0.00298075	0.616355	NA	NA
1890	10355464	7.45309	0.000538025	0.00298075	3.08271	Pecr	peroxisomal trans-2-enoyl-CoA reductase
1891	10557705	-7.45292	0.000538306	0.00298075	0.669967	Phkg2	phosphorylase kinase, gamma 2 (testis)
1892	10490989	7.45264	0.000538587	0.00298075	3.8178	Cp	ceruloplasmin
1893	10530215	-7.44771	0.000538868	0.00298075	0.64784	Smim14	small integral membrane protein 14
1894	10427816	-7.44765	0.00053915	0.00298075	0.549302	Pdzd2	PDZ domain containing 2
1895	10343618	-7.44759	0.000539431	0.00298075	0.503178	NA	NA
1896	10339947	-7.44736	0.000539712	0.00298075	0.510068	NA	NA
1897	10481344	7.44629	0.000539993	0.00298075	1.27988	NA	NA
1898	10389865	7.44549	0.000540274	0.00298075	2.26424	NA	NA
1899	10482229	7.44299	0.000540556	0.00298075	1.53359	Psmb7	proteasome (prosome, macropain) subunit, beta type 7
1900	10556266	7.44296	0.000540837	0.00298075	2.46677	Wee1	WEE 1 homolog 1 (S. pombe)
1901	10578493	7.44269	0.000541118	0.00298075	1.38716	Tlr3	toll-like receptor 3
1902	10402752	7.44263	0.000541399	0.00298075	1.88095	2010107E04Rik	RIKEN cDNA 2010107E04 gene
1903	10556790	7.44212	0.000541681	0.00298075	1.63192	2610020H08Rik	RIKEN cDNA 2610020H08 gene
1904	10408348	-7.43911	0.000541962	0.00298075	0.715801	Mrs2	MRS2 magnesium homeostasis factor homolog (S. cerevisiae)
1905	10600144	-7.4388	0.000542243	0.00298075	0.707201	F8a	factor 8-associated gene A
1906	10421394	-7.43754	0.000542524	0.00298075	0.603784	Fam160b2	family with sequence similarity 160, member B2
1907	10480760	-7.43319	0.000542806	0.00298075	0.698399	Traf2	TNF receptor-associated factor 2
1908	10400126	-7.43229	0.000543087	0.00298075	0.32183	Lrrn3	leucine rich repeat protein 3, neuronal
1909	10432573	-7.43059	0.000543368	0.00298075	0.487874	Slc11a2	solute carrier family 11 (proton-coupled divalent metal ion transporters), member 2
1910	10406663	7.42815	0.000543649	0.00298075	2.81968	Arsb	arylsulfatase B
1911	10594928	7.4235	0.000543931	0.00298075	1.71025	NA	NA
1912	10535750	-7.4207	0.000544212	0.00298075	0.621837	Mtif3	mitochondrial translational initiation factor 3
1913	10427310	7.41901	0.000544493	0.00298075	1.4412	NA	NA
1914	10499160	-7.41833	0.000544774	0.00298075	0.335593	Cd1d1	CD1d1 antigen
1915	10540191	-7.41788	0.000545056	0.00298075	0.749671	Nr2c2	nuclear receptor subfamily 2, group C, member 2
1916	10602704	-7.41723	0.000545337	0.00298075	0.393985	Klf8	Kruppel-like factor 8
1917	10409152	-7.41601	0.000545618	0.00298075	0.715653	1110007C09Rik	RIKEN cDNA 1110007C09 gene
1918	10343051	-7.41194	0.000545899	0.00298075	0.65069	NA	NA
1919	10455227	-7.41073	0.000546181	0.00298075	0.751735	Rnf14	ring finger protein 14
1920	10448563	-7.40996	0.000546462	0.00298075	0.707451	E4f1	E4F transcription factor 1
1921	10485294	7.40841	0.000546743	0.00298075	2.35449	Hsd17b12	hydroxysteroid (17-beta) dehydrogenase 12
1922	10385239	-7.40564	0.000547024	0.00298075	0.614483	Mat2b	methionine adenosyltransferase II, beta
1923	10450363	7.40415	0.000547306	0.00298075	3.40933	Snord52	small nucleolar RNA, C/D box 52
1924	10341721	7.40363	0.000547587	0.00298075	1.96024	NA	NA
1925	10590433	7.3991	0.000547868	0.00298075	5.04235	1700048O20Rik	RIKEN cDNA 1700048O20 gene
1926	10415415	-7.39737	0.000548149	0.00298075	0.504309	Khnyn	KH and NYN domain containing
1927	10594322	-7.39294	0.000548431	0.00298075	0.672272	Pias1	protein inhibitor of activated STAT 1
1928	10340585	-7.39261	0.000548712	0.00298075	0.65828	NA	NA
1929	10338237	-7.3899	0.000548993	0.00298075	0.448118	NA	NA
1930	10435162	-7.38843	0.000549274	0.00298075	0.582596	Lrch3	leucine-rich repeats and calponin homology (CH) domain containing 3
1931	10533729	-7.38803	0.000549556	0.00298075	0.489305	Vps37b	vacuolar protein sorting 37B (yeast)
1932	10507112	7.38758	0.000549837	0.00298075	3.8572	Stil	Scl/Tal1 interrupting locus
1933	10577782	-7.38539	0.000550118	0.00298075	0.437462	Htra4	HtrA serine peptidase 4
1934	10580169	-7.38131	0.000550399	0.00298075	0.578826	Ccdc130	coiled-coil domain containing 130
1935	10512315	-7.38015	0.000550681	0.00298075	0.528285	NA	NA
1936	10598178	-7.37779	0.000550962	0.00298075	0.630926	Disp1	dispatched homolog 1 (Drosophila)
1937	10341364	7.37654	0.000551243	0.00298075	2.02598	NA	NA
1938	10436048	7.37491	0.000551524	0.00298075	1.93425	NA	NA
1939	10509168	-7.37337	0.000551806	0.00298075	0.218811	E2f2	E2F transcription factor 2
1940	10519183	7.37193	0.000552087	0.00298075	1.73612	Atad3a	ATPase family, AAA domain containing 3A
1941	10504194	-7.37092	0.000552649	0.00298075	0.593662	NA	NA
1942	10504164	-7.37092	0.000552649	0.00298075	0.593662	NA	NA
1943	10553993	7.37052	0.000552931	0.00298075	1.68707	Snrpa1	small nuclear ribonucleoprotein polypeptide A'
1944	10439276	7.36956	0.000553212	0.00298075	2.19492	Fam162a	family with sequence similarity 162, member A
1945	10477966	-7.36813	0.000553493	0.00298075	0.618775	Manbal	mannosidase, beta A, lysosomal-like
1946	10372687	7.36718	0.000553774	0.00298075	1.4687	Nup107	nucleoporin 107
1947	10603814	-7.36583	0.000554056	0.00298075	0.471222	Slc9a7	solute carrier family 9 (sodium/hydrogen exchanger), member 7
1948	10570437	-7.36461	0.000554337	0.00298075	0.623411	Fbxo25	F-box protein 25
1949	10428796	-7.36423	0.000554618	0.00298075	0.560722	Fbxo32	F-box protein 32
1950	10387557	7.36406	0.000554899	0.00298075	1.77761	Eif4a1	eukaryotic translation initiation factor 4A1
1951	10348537	7.36308	0.000555181	0.00298075	4.60556	Ramp1	receptor (calcitonin) activity modifying protein 1
1952	10340651	-7.36286	0.000555462	0.00298075	0.510109	NA	NA
1953	10442258	-7.36251	0.000555743	0.00298075	0.444213	Zfp943	zinc finger prtoein 943
1954	10574288	7.36136	0.000556024	0.00298075	8.32277	Ccdc135	coiled-coil domain containing 135
1955	10342684	7.36122	0.000556306	0.00298075	1.34645	NA	NA
1956	10392735	7.36017	0.000556587	0.00298075	1.21627	Cdc42ep4	CDC42 effector protein (Rho GTPase binding) 4
1957	10463517	7.35982	0.000556868	0.00298075	2.60907	Pprc1	peroxisome proliferative activated receptor, gamma, coactivator-related 1
1958	10366705	7.3567	0.000557149	0.00298075	1.8042	NA	NA
1959	10357454	7.35361	0.000557431	0.00298075	1.57575	Dars	aspartyl-tRNA synthetase
1960	10576246	7.3526	0.000557712	0.00298075	1.75078	NA	NA
1961	10529041	-7.35244	0.000557993	0.00298075	0.783469	Preb	prolactin regulatory element binding
1962	10421029	7.35168	0.000558274	0.00298075	3.17824	Cdca2	cell division cycle associated 2
1963	10438738	-7.35148	0.000558556	0.00298075	0.20701	Bcl6	B cell leukemia/lymphoma 6
1964	10348618	-7.34746	0.000559118	0.00298133	0.731327	Asb1	ankyrin repeat and SOCS box-containing 1
1965	10413419	-7.34298	0.000559399	0.00298133	0.425923	Arhgef3	Rho guanine nucleotide exchange factor (GEF) 3
1966	10541216	-7.34084	0.000559681	0.00298133	0.649776	Kdm5a	lysine (K)-specific demethylase 5A
1967	10466402	7.33849	0.000559962	0.00298133	1.27093	Eif4a1	eukaryotic translation initiation factor 4A1
1968	10339245	-7.33798	0.000560243	0.00298133	0.69622	NA	NA
1969	10551464	7.33722	0.000560524	0.00298133	1.5092	Fbl	fibrillarin
1970	10415778	7.33476	0.000560805	0.00298133	2.04964	Arl11	ADP-ribosylation factor-like 11
1971	10571849	-7.33245	0.000561087	0.00298133	0.660355	Fbxo8	F-box protein 8
1972	10342130	-7.33226	0.000561368	0.00298133	0.743861	NA	NA
1973	10465651	-7.33203	0.000561649	0.00298133	0.748854	Mark2	MAP/microtubule affinity-regulating kinase 2
1974	10586591	7.33087	0.00056193	0.00298133	4.12951	Car12	carbonic anyhydrase 12
1975	10591781	7.33018	0.000562212	0.00298133	4.50663	Anln	anillin, actin binding protein
1976	10427538	-7.32966	0.000562493	0.00298133	0.627789	Nipbl	Nipped-B homolog (Drosophila)
1977	10508382	7.32958	0.000562774	0.00298133	1.42947	Ak2	adenylate kinase 2
1978	10381539	7.32877	0.000563055	0.00298133	1.78388	G6pc3	glucose 6 phosphatase, catalytic, 3
1979	10594785	-7.32747	0.000563337	0.00298133	0.603351	Rnf111	ring finger 111
1980	10589994	-7.32434	0.000563618	0.00298133	0.429466	Eomes	eomesodermin homolog (Xenopus laevis)
1981	10368270	7.32352	0.000563899	0.00298133	1.73426	NA	NA
1982	10455346	7.32067	0.00056418	0.00298133	1.64779	Tcerg1	transcription elongation regulator 1 (CA150)
1983	10432986	7.32027	0.000564462	0.00298133	1.57734	Aaas	achalasia, adrenocortical insufficiency, alacrimia
1984	10548884	-7.31983	0.000564743	0.00298133	0.589353	Erp27	endoplasmic reticulum protein 27
1985	10563116	-7.31946	0.000565024	0.00298133	0.536286	NA	NA
1986	10596925	-7.31946	0.000565305	0.00298133	0.539742	Ndufaf3	NADH dehydrogenase (ubiquinone) 1 alpha subcomplex, assembly factor 3
1987	10372618	-7.31861	0.000565587	0.00298133	0.601582	Frs2	fibroblast growth factor receptor substrate 2
1988	10368647	7.31413	0.000565868	0.00298133	3.39071	Dse	dermatan sulfate epimerase
1989	10474239	7.31346	0.000566149	0.00298133	1.37996	NA	NA
1990	10466925	-7.31183	0.00056643	0.00298133	0.630141	Ak3	adenylate kinase 3
1991	10351465	-7.30884	0.000566712	0.00298133	0.54454	1700084C01Rik	RIKEN cDNA 1700084C01 gene
1992	10345025	7.307	0.000566993	0.00298133	1.67862	NA	NA
1993	10473737	7.30637	0.000567274	0.00298133	1.61396	Mtch2	mitochondrial carrier homolog 2 (C. elegans)
1994	10436106	7.30546	0.000567555	0.00298133	3.09891	C330027C09Rik	RIKEN cDNA C330027C09 gene
1995	10529661	-7.30412	0.000567837	0.00298133	0.666655	Zbtb49	zinc finger and BTB domain containing 49
1996	10342352	-7.30293	0.000568118	0.00298133	0.584798	NA	NA
1997	10516081	7.30246	0.000568399	0.00298133	1.44463	Ppie	peptidylprolyl isomerase E (cyclophilin E)
1998	10591612	7.30189	0.00056868	0.00298133	1.31935	Dock6	dedicator of cytokinesis 6
[truncated: 6,442 more rows]
