# Supplementary material for: Infection Exposure Is a Causal Factor in B-cell Precursor Acute Lymphoblastic Leukemia as a Result of Pax5 -Inherited Susceptibility
Source: Oxford University Press journal article supplement (doi:10.1158/2159-8290.cd-15-0892), 2015-09-25
Supplement: 21598290cd150892-sup-153083_1_supp_3134887_n4982l.xlsx [file 21598290cd150892-sup-153083_1_supp_3134887_n4982l.xlsx]

## Sheet: Hoja1
Supplementary Table S3: Pax5 target genes differentially express in p-BALL bearing Pax5+/- mice according to Delogu, A. et al. 2006; Schebesta, A. et al 2007. and Revilla-i-Domingo, R. et al. 2012.
Genes upregulated by Pax5 in WT B cells
nº	probeset ID	d.value	p.value	q.value	R.fold	Genename	Description	Pax5 regulated gene
152	10562812	-14.6595	4.27495e-05	0.00294623	0.263364	Spib	Spi-B transcription factor (Spi-1/PU.1 related)	Spib
913	10404389	-9.22292	0.000258184	0.00296214	0.157034	Irf4	interferon regulatory factor 4	Irf4
937	10407782	-9.16531	0.000265215	0.00296484	0.12306	Edaradd	EDAR (ectodysplasin-A receptor)-associated death domain	Edaradd
1124	10503695	-8.70816	0.000319215	0.00297069	0.137137	Bach2	BTB and CNC homology 2	Bach2
1125	10383731	8.70379	0.000319496	0.00297069	2.83598	Smtn	smoothelin	Smtn
1423	10495781	-8.13265	0.00040387	0.00297217	0.137411	Bcar3	breast cancer anti-estrogen resistance 3	Bcar3
1524	10390640	-7.95502	0.000432838	0.0029738	0.0486316	Ikzf3	IKAROS family zinc finger 3	Ikzf3
1795	10427997	-7.5555	0.000510462	0.00297874	0.341186	Ankrd33b	ankyrin repeat domain 33B	Ankrd33b
1939	10509168	-7.37337	0.000551806	0.00298075	0.218811	E2f2	E2F transcription factor 2	E2f2
2232	10580504	-6.98938	0.000636742	0.0029883	0.585067	Snx20	sorting nexin 20	Snx20
2280	10502081	-6.92734	0.000651648	0.00299405	0.232775	Enpep	glutamyl aminopeptidase	Enpep
3153	10495967	-6.09982	0.000914332	0.00303778	0.2601	Tifa	TRAF-interacting protein with forkhead-associated domain	Tifa
3193	10397966	-6.06404	0.000926707	0.00304029	0.0952058	Otub2	OTU domain, ubiquitin aldehyde binding 2	Otub2
3282	10408850	-5.99788	0.000956519	0.00305293	0.338689	Nedd9	neural precursor cell expressed, developmentally down-regulated gene 9	Nedd9
4423	10557399	-5.1959	0.00135589	0.00321111	0.228221	Sbk1	SH3-binding kinase 1	Sbk1
4990	10476252	-4.9053	0.00158511	0.00332765	0.41603	Cdc25b	cell division cycle 25B	Cdc25b
5489	10550365	-4.66959	0.00181601	0.00346572	0.644856	Prkd2	protein kinase D2	Prkd2
5659	10360173	-4.6001	0.00189701	0.00351134	0.283291	Slamf7	SLAM family member 7	Slamf7
6476	10359689	-4.2664	0.00240128	0.00388433	0.112323	Atp1b1	ATPase, Na+/K+ transporting, beta 1 polypeptide	Atp1b1
6890	10512480	-4.11109	0.00270222	0.00410831	0.380918	Sit1	suppression inducing transmembrane adaptor 1	Sit1
7259	10549222	3.97152	0.00304309	0.00439155	3.01986	Bcat1	branched chain aminotransferase 1, cytosolic	Bcat1
8433	10370471	-3.57392	0.00469625	0.00570788	0.727407	Agpat3	1-acylglycerol-3-phosphate O-acyltransferase 3	Agpat3
Genes downregulated by Pax5 in WT B cells
nº	probeset ID	d.value	p.value	q.value	R.fold	Genename	Description	Pax5 regulated gene
183	10357833	14.1004	5.14681e-05	0.00294623	6.85566	Atp2b4	ATPase, Ca++ transporting, plasma membrane 4	Atp2b4
702	10542355	9.96555	0.000198279	0.00295723	7.26466	Emp1	epithelial membrane protein 1	Emp1
994	10466304	9.03661	0.000281809	0.00296985	3.19385	Dtx4	deltex 4 homolog (Drosophila)	Dtx4
1381	10407327	8.20521	0.000391776	0.0029718	6.00246	Emb	embigin	Emb
1951	10348537	7.36308	0.000555181	0.00298075	4.60556	Ramp1	receptor (calcitonin) activity modifying protein 1	Ramp1
2672	10476945	6.52928	0.000767803	0.00301019	6.51442	Cst7	cystatin F (leukocystatin)	Cst7
3270	10535780	6.00442	0.000952863	0.00305239	9.81003	Flt3	FMS-like tyrosine kinase 3	Flt3
5373	10368720	4.71575	0.0017592	0.00342978	2.36903	Slc16a10	solute carrier family 16 (monocarboxylic acid transporters), member 10	Slc16a10

## Sheet: Hoja2
Agpat3
Ankrd33b
Atp1b1
Bach2
Bcar3
Bcat1
Cdc25b
E2f2
Edaradd
Enpep
Ikzf3
Irf4
Nedd9
Otub2
Prkd2
Sbk1
Sit1
Slamf7
Smtn
Snx20
Spib
Tifa
