# Supplementary material for: Infection Exposure Is a Causal Factor in B-cell Precursor Acute Lymphoblastic Leukemia as a Result of Pax5 -Inherited Susceptibility
Source: Oxford University Press journal article supplement (doi:10.1158/2159-8290.cd-15-0892), 2015-09-25
Supplement: 21598290cd150892-sup-153083_1_supp_3134888_n6982l.xlsx [file 21598290cd150892-sup-153083_1_supp_3134888_n6982l.xlsx]

## Sheet: Hoja1
Supplementary Table S4: Total numbers and percentage of hematopoietic subsets in young Pax5+/- and wild type mice
			3 months		6 months		9 months
			Percentage ± SD		Percentage ± SD		Percentage ± SD
Compartment	Subset	Markers	Wild-Type (n=22)	Pax5+/- (n=12)	Wild-Type (n=22)	Pax5+/- (n=12)	Wild-Type (n=22)	Pax5+/- (n=12)
Peripheral Blood	CD4 T cells	CD4+	28.6 ± 7.10	39.85 ± 5.70	24.62 ± 6.25	28.29 ± 12.53	23.74 ± 6.11	26.97 ± 7.59
	CD8 T cells	CD8+	15.45 ± 3.88	19.17 ± 4.23	16.09 ± 5.43	17.26 ± 6.99	15.52 ± 5.62	13.42 ± 9.09
	B cells	IgM+/-B220+	32.38 ± 7.44	19.05 ± 9.26	36.06 ± 10.16	20.57 ± 8.50	36.89 ± 11.1	25.93 ± 10.68
	Granulocytes	Gr1+Mac1+	8.70 ± 7.46	6.87 ± 3.86	7.15 ± 5.07	13.09 ± 5.59	9.24 ± 3.80	16.74 ± 6.12
Compartment	Subset	Markers	Wild-Type (n=4)		Pax5+/- (n=8)
Bone Marrow			Percentage of cells	number of cells	Percentage of cells	number of cells
	CD4 T cells	CD4+	1.07 ± 0.30	608,830 ± 170,700	1.27 ± 0.52	722,630 ± 295,880
	CD8 T cells	CD8+	1.22 ± 0.74	694,180 ± 421,060	1.01 ± 0.44	574,690 ± 250,360
	Immature B cells	IgM+ B220low	0.91 ± 0.26	517,790 ± 147,940	2.41 ± 0.99	1,371,290 ± 563,310
	preB and proB cells	IgM- B220low	5.62 ± 2.49	3,197,780 ± 1,416,810	14.17 ± 3.43	8,062,730 ± 1,951,670
	Recirculating B cells	IgM+ B220high	6.47 ± 1.68	3,681,430 ± 955,920	5.40 ± 2.30	3,072,600 ± 1,308,700
	B cells	IgM+/-B220+	12.78 ± 2.91	7,271,820 ± 1,655,790	21.99 ± 5.93	12,512,310 ± 3,374,170
	Granulocytes	Gr1+Mac1+	42.32 ± 17.81	24,080,080 ± 10,133,890	41.40 ± 8.72	23,556,600 ± 4,916,680
	Hematopoietic stem cells	Sca1+Lin-cKit+	0.71 ± 0.64	141,396 ± 129,445	0.17 ± 0.09	33,855 ± 17,923
