# Supplementary material for: Infection Exposure Is a Causal Factor in B-cell Precursor Acute Lymphoblastic Leukemia as a Result of Pax5 -Inherited Susceptibility
Source: Oxford University Press journal article supplement (doi:10.1158/2159-8290.cd-15-0892), 2015-09-25
Supplement: 21598290cd150892-sup-153083_1_supp_3134889_ny98f0.xlsx [file 21598290cd150892-sup-153083_1_supp_3134889_ny98f0.xlsx]

## Sheet: va_fp_0.1freq_filter2_sorted
Mouse ID	coordinates	exchange	variation.type	samples.genotype	samples.num	samples.gene	symbol	rsid	variation.type
O361	1:11511931-11511931	11511931-11511931:A>C	A>C	SNP	[9_T.mutect] 0/1 (0.0), [9T_varscan_fp_0.1freq_0.1filter] 0/1 (0.0)	2	2	A830018L16Rik		missense_variant
	1:85100291-85100291	85100291-85100291:C>T	C>T	SNP	[9T_varscan_fp_0.1freq_0.1filter] 0/1 (0.0)	1	1	Gm10553		missense_variant
	2:89618126-89618126	89618126-89618126:T>G	T>G	SNP	[9_T.mutect] 0/1 (0.0)	1	1	Olfr1248	rs220812497	missense_variant
	3:93219347-93219347	93219347-93219347:A>T	A>T	SNP	[9T_varscan_fp_0.1freq_0.1filter] 0/1 (0.0)	1	1	Flg2		missense_variant
	4:60069808-60069808	60069808-60069808:T>A	T>A	SNP	[9T_varscan_fp_0.1freq_0.1filter] 0/1 (0.0)	1	1	Mup7	rs13469831	missense_variant
	4:60222445-60222445	60222445-60222445:C>A	C>A	SNP	[9T_varscan_fp_0.1freq_0.1filter] 1/1 (0.0)	1	1	Mup8		missense_variant
	4:61303382-61303382	61303382-61303382:C>G	C>G	SNP	[9T_varscan_fp_0.1freq_0.1filter] 0/1 (0.0)	1	1	Mup14		missense_variant
	4:88780215-88780215	88780215-88780215:G>C	G>C	SNP	[9T_varscan_fp_0.1freq_0.1filter] 0/1 (0.0)	1	1	Gm13272		missense_variant
	4:101163709-101163709	101163709-101163709:A>G	A>G	SNP	[9_T.mutect] 0/1 (0.0), [9T_varscan_fp_0.1freq_0.1filter] 0/1 (0.0)	2	2	Jak1		missense_variant
	4:129992415-129992415	129992415-129992415:C>T	C>T	SNP	[9T_varscan_fp_0.1freq_0.1filter] 1/1 (0.0), [10T_varscan_fp_0.1freq_0.1filter] 0/1 (0.0)	2	2	Bai2	rs249378026	missense_variant
	5:14858756-14858756	14858756-14858756:T>C	T>C	SNP	[9_T.mutect] 0/1 (0.0), [9T_varscan_fp_0.1freq_0.1filter] 0/1 (0.0)	2	2	Pclo		missense_variant
	5:121167955-121167955	121167955-121167955:C>T	C>T	SNP	[9_T.mutect] 0/1 (0.0), [9T_varscan_fp_0.1freq_0.1filter] 0/1 (0.0)	2	2	Ptpn11		missense_variant
	5:124402204-124402204	124402204-124402204:G>A	G>A	SNP	[9T_varscan_fp_0.1freq_0.1filter] 0/1 (0.0)	1	1	Sbno1		missense_variant
	6:69243160-69243160	69243160-69243160:T>G	T>G	SNP	[9T_varscan_fp_0.1freq_0.1filter] 0/1 (0.0)	1	1	Igkv4-71		missense_variant
	7:16497980-16497980	16497980-16497980:C>T	C>T	SNP	[9_T.mutect] 0/1 (0.0), [9T_varscan_fp_0.1freq_0.1filter] 0/1 (0.0)	2	2	Grlf1		missense_variant
	7:38519652-38519652	38519652-38519652:T>G	T>G	SNP	[9T_varscan_fp_0.1freq_0.1filter] 0/1 (0.0)	1	1	Gm5591		missense_variant
	7:38522012-38522012	38522012-38522012:C>T	C>T	SNP	[9T_varscan_fp_0.1freq_0.1filter] 0/1 (0.0)	1	1	Gm5591		missense_variant
	8:71684008-71684008	71684008-71684008:G>A	G>A	SNP	[9_T.mutect] 0/1 (0.0), [10_T_cln.mutect] 0/1 (0.0), [9T_varscan_fp_0.1freq_0.1filter] 0/1 (0.0), [10T_varscan_fp_0.1freq_0.1filter] 0/1 (0.0)	4	4	Jak3		missense_variant
	10:99444782-99444782	99444782-99444782:C>T	C>T	SNP	[9T_varscan_fp_0.1freq_0.1filter] 0/1 (0.0)	1	1	Gad1-ps		missense_variant
	11:30837369-30837369	30837369-30837369:G>A	G>A	SNP	[9_T.mutect] 0/1 (0.0)	1	1	Psme4		missense_variant
	13:27094283-27094283	27094283-27094283:G>A	G>A	SNP	[9_T.mutect] 0/1 (0.0), [9T_varscan_fp_0.1freq_0.1filter] 0/1 (0.0)	2	2	Prl3d1		missense_variant
	14:42159433-42159433	42159433-42159433:T>G	T>G	SNP	[9T_varscan_fp_0.1freq_0.1filter] 0/1 (0.0)	1	1	Gm17027		missense_variant
	15:78348410-78348410	78348410-78348410:C>T	C>T	SNP	[9_T.mutect] 0/1 (0.0)	1	1	Csf2rb		missense_variant
	15:88781189-88781189	88781189-88781189:G>A	G>A	SNP	[9_T.mutect] 0/1 (0.0)	1	1	Zbed4		missense_variant
	15:100406292-100406292	100406292-100406292:A>T	A>T	SNP	[9T_varscan_fp_0.1freq_0.1filter] 0/1 (0.0)	1	1	Slc11a2		missense_variant
	15:100969118-100969118	100969118-100969118:T>G	T>G	SNP	[9_T.mutect] 0/1 (0.0), [9T_varscan_fp_0.1freq_0.1filter] 0/1 (0.0)	2	2	Scn8a		missense_variant
	16:35769102-35769102	35769102-35769102:A>C	A>C	SNP	[9T_varscan_fp_0.1freq_0.1filter] 0/1 (0.0)	1	1	Dirc2		missense_variant
	17:37805463-37805463	37805463-37805463:C>A	C>A	SNP	[9_T.mutect] 0/1 (0.0)	1	1	Olfr124		missense_variant
	X:48417884-48417884	48417884-48417884:C>A	C>A	SNP	[9_T.mutect] 0/1 (0.0)	1	1	Elf4		missense_variant
	X:83714304-83714304	83714304-83714304:T>G	T>G	SNP	[9_T.mutect] 0/1 (0.0), [9T_varscan_fp_0.1freq_0.1filter] 0/1 (0.0)	2	2	Dmd		missense_variant
	X:108758963-108758963	108758963-108758963:G>A	G>A	SNP	[9T_varscan_fp_0.1freq_0.1filter] 0/1 (0.0)	1	1	Brwd3		missense_variant
O388	1:85591585-85591585	85591585-85591585:G>T	G>T	SNP	[10T_varscan_fp_0.1freq_0.1filter] 0/1 (0.0)	1	1	Sp110		missense_variant
	3:28024285-28024285	28024285-28024285:G>A	G>A	SNP	[10_T_cln.mutect] 0/1 (0.0), [10T_varscan_fp_0.1freq_0.1filter] 0/1 (0.0)	2	2	Pld1		missense_variant
	4:129992415-129992415	129992415-129992415:C>T	C>T	SNP	[9T_varscan_fp_0.1freq_0.1filter] 1/1 (0.0), [10T_varscan_fp_0.1freq_0.1filter] 0/1 (0.0)	2	2	Bai2	rs249378026	missense_variant
	6:141250074-141250074	141250074-141250074:C>A	C>A	SNP	[10T_varscan_fp_0.1freq_0.1filter] 0/1 (0.0)	1	1	Pde3a		missense_variant
	7:19534687-19534687	19534687-19534687:C>G	C>G	SNP	[10_T_cln.mutect] 0/1 (0.0)	1	1	Ppp1r37		missense_variant
	7:121125562-121125562	121125562-121125562:T>C	T>C	SNP	[10_T_cln.mutect] 0/1 (0.0), [10T_varscan_fp_0.1freq_0.1filter] 0/1 (0.0)	2	2	Otoa		missense_variant
	8:71684008-71684008	71684008-71684008:G>A	G>A	SNP	[9_T.mutect] 0/1 (0.0), [10_T_cln.mutect] 0/1 (0.0), [9T_varscan_fp_0.1freq_0.1filter] 0/1 (0.0), [10T_varscan_fp_0.1freq_0.1filter] 0/1 (0.0)	4	4	Jak3		missense_variant
	9:3028862-3028862	3028862-3028862:A>T	A>T	SNP	[10T_varscan_fp_0.1freq_0.1filter] 0/1 (0.0)	1	1	Gm10106		missense_variant
	9:58859960-58859960	58859960-58859960:C>A	C>A	SNP	[10T_varscan_fp_0.1freq_0.1filter] 0/1 (0.0)	1	1	Hcn4		missense_variant
	9:62429226-62429226	62429226-62429226:C>A	C>A	SNP	[10T_varscan_fp_0.1freq_0.1filter] 0/1 (0.0)	1	1	Coro2b		missense_variant
	11:79441004-79441004	79441004-79441004:C>T	C>T	SNP	[10_T_cln.mutect] 0/1 (0.0), [10T_varscan_fp_0.1freq_0.1filter] 0/1 (0.0)	2	2	Nf1		stop_gained
	11:108942230-108942230	108942230-108942230:C>T	C>T	SNP	[10_T_cln.mutect] 0/1 (0.0), [10T_varscan_fp_0.1freq_0.1filter] 0/1 (0.0)	2	2	Axin2		missense_variant
	17:42710353-42710353	42710353-42710353:C>T	C>T	SNP	[10T_varscan_fp_0.1freq_0.1filter] 0/1 (0.0)	1	1	Gpr111		missense_variant
	18:49955887-49955887	49955887-49955887:G>T	G>T	SNP	[10T_varscan_fp_0.1freq_0.1filter] 0/1 (0.0)	1	1	Dmxl1		missense_variant
	19:13313662-13313662	13313662-13313662:A>C	A>C	SNP	[10T_varscan_fp_0.1freq_0.1filter] 0/1 (0.0)	1	1	Olfr1465	rs50676589	missense_variant
	19:13445798-13445798	13445798-13445798:T>C	T>C	SNP	[10T_varscan_fp_0.1freq_0.1filter] 0/1 (0.0)	1	1	Olfr1471	rs243223850	missense_variant
S665	4:44692006-44692006	44692006-44692006:G>C	G>C	SNP	[11T_varscan_fp_0.1freq_0.1filter] 0/1 (0.0)	1	1	Pax5		missense_variant
	5:118065982-118065982	118065982-118065982:C>A	C>A	SNP	[11T_varscan_fp_0.1freq_0.1filter] 0/1 (0.0)	1	1	Gm9754		stop_gained
	5:146183465-146183465	146183465-146183465:C>T	C>T	SNP	[11T_varscan_fp_0.1freq_0.1filter] 0/1 (0.0)	1	1	1700001J03Rik		missense_variant
	6:69226856-69226856	69226856-69226856:G>A	G>A	SNP	[11T_varscan_fp_0.1freq_0.1filter] 0/1 (0.0)	1	1	Igkv4-72		missense_variant
	9:3017163-3017163	3017163-3017163:G>A	G>A	SNP	[11T_varscan_fp_0.1freq_0.1filter] 0/1 (0.0)	1	1	Gm10720		missense_variant
	11:48915587-48915587	48915587-48915587:A>G	A>G	SNP	[11T_varscan_fp_0.1freq_0.1filter] 0/1 (0.0)	1	1	Gm12185		missense_variant
	11:102313873-102313873	102313873-102313873:A>C	A>C	SNP	[11_T.mutect] 0/1 (0.0)	1	1	Ubtf		missense_variant
	14:30036483-30036483	30036483-30036483:G>A	G>A	SNP	[11T_varscan_fp_0.1freq_0.1filter] 0/1 (0.0)	1	1	Chdh		missense_variant
	14:31500214-31500214	31500214-31500214:T>A	T>A	SNP	[11T_varscan_fp_0.1freq_0.1filter] 0/1 (0.0)	1	1	Eaf1		missense_variant
